# 1 **Enhanced cultured diversity of the mouse gut microbiota enables custom-** 2 **made synthetic communities**

3 Afrizal Afrizal,<sup>1,\*</sup> Susan A. V. Jennings,<sup>1,\*</sup> Thomas C. A. Hitch,<sup>1,\*</sup> Thomas Riedel,<sup>2,3</sup> Marijana Basic,<sup>4</sup>  
4 Atscharah Panyot,<sup>1</sup> Nicole Treichel,<sup>1</sup> Fabian T. Hager,<sup>5</sup> Ramona Brück,<sup>6</sup> Erin Oi-Yan Wong,<sup>7</sup> Alexandra  
5 von Stempel,<sup>8</sup> Claudia Eberl,<sup>8</sup> Eva M. Buhl,<sup>9</sup> Birte Abt,<sup>2,3</sup> André Bleich,<sup>4</sup> René Tolba,<sup>10</sup> William W.  
6 Navarre,<sup>7</sup> Fabian Kiessling,<sup>6</sup> Hans-Peter Horz,<sup>11</sup> Natalia Torow,<sup>12</sup> Vuk Cerovic,<sup>5</sup> Bärbel Stecher,<sup>8,13</sup> Till  
7 Strowig,<sup>14</sup> Jörg Overmann,<sup>2,3</sup> Thomas Clavel<sup>1,#</sup>

8 \* These authors share first authorship

9 # Correspondence: [tclavel@ukaachen.de](mailto:tclavel@ukaachen.de)

10 <sup>1</sup> Functional Microbiome Research Group, Institute of Medical Microbiology, University Hospital of  
11 RWTH Aachen, Aachen, Germany

12 <sup>2</sup> Leibniz Institute DSMZ-German Collection of Microorganisms and Cell Cultures, Braunschweig,  
13 Germany

14 <sup>3</sup> German Centre for Infection Research (DZIF), Partner site Hannover-Braunschweig, Braunschweig,  
15 Germany

16 <sup>4</sup> Institute for Laboratory Animal Science, Hannover Medical School, Germany

17 <sup>5</sup> Institute of Molecular Medicine, University Hospital of RWTH Aachen, Aachen, Germany

18 <sup>6</sup> Institute of Experimental Molecular Imaging, University Hospital of RWTH Aachen, Aachen, Germany

19 <sup>7</sup> Department of Molecular Genetics, University of Toronto, Toronto, ON, M5S 1A8, Canada

20 <sup>8</sup> Max von Pettenkofer Institute of Hygiene and Medical Microbiology, Ludwig-Maximilians-University  
21 of Munich, Germany

22 <sup>9</sup> Electron Microscopy Facility, Institute of Pathology, RWTH University Hospital, Aachen, Germany.

23 <sup>10</sup> Institute of Laboratory Animal Science, University Hospital of RWTH Aachen, Aachen, Germany

24 <sup>11</sup> Phage Biology Group, Institute of Medical Microbiology, University Hospital of RWTH Aachen,  
25 Aachen, Germany

26 <sup>12</sup> Neonatal Infection and Pathogenicity, Institute of Medical Microbiology, University Hospital of  
27 RWTH Aachen, Aachen, Germany

28 <sup>13</sup> German Centre for Infection Research (DZIF); Partner Site Munich, Germany

29 <sup>14</sup> Department of Microbial Immune Regulation, Helmholtz Centre for Infection Research,  
30 Braunschweig, Germany

31

32 **Microbiome research is hampered by the fact that many bacteria are still unknown and by the lack**  
33 **of publicly available isolates. Fundamental and clinical research is in need of comprehensive and**  
34 **well-curated repositories of cultured bacteria from the intestine of mammalian hosts. In this work,**  
35 **we expanded the mouse intestinal bacterial collection ([www.dsmz.de/miBC](http://www.dsmz.de/miBC)) to 212 strains, all**  
36 **publicly available and taxonomically described. This includes the study of strain-level diversity,**  
37 **small-sized bacteria, and the isolation and characterization of the first cultured members of one**  
38 **novel family, 10 novel genera, and 39 novel species. We demonstrate the value of this collection by**  
39 **performing two studies. First, metagenome-educated design allowed establishing custom synthetic**  
40 **communities (SYNs) that reflect different susceptibilities to DSS-induced colitis. Second, nine**  
41 **phylogenetically and functionally diverse species were used to amend the Oligo-Mouse Microbiota**  
42 **(OMM)12 model [Brugiroux et al. 2016 Nat Microbiol]. These strains compensated for differences**  
43 **observed between gnotobiotic OMM12 and specific pathogen-free (SPF) mice at multiple levels,**  
44 **including body composition and immune cell populations (e.g., T-cell subtypes) in the intestine and**  
45 **associated lymphoid tissues. Ready-to-use OMM stocks are available to the community for use in**  
46 **future studies. In conclusion, this work improves our knowledge of gut microbiota diversity in mice**  
47 **and enables functional studies via the modular use of isolates.**

48

49 Omics technologies have been instrumental for exploring the diversity and functions within the gut  
50 microbiota, which include prokaryotes, fungi, and viruses, and for studying microbe-microbe and  
51 microbe-host interactions.<sup>1</sup> A major challenge that remains is the large proportion of unknown  
52 microbial genes and corresponding taxa, which limits both molecular and experimental studies.<sup>2,3</sup> The  
53 renewed interest in cultivation-based research on gut microbiomes helps address this issue, albeit  
54 primarily in the case of human gut bacteria.<sup>4-8</sup> As enteric microbiomes are host species-specific and  
55 mice are important research models,<sup>9-11</sup> we created the mouse intestinal bacterial collection (miBC) in  
56 2016, making all strains publicly available.<sup>12</sup> This included the first taxonomically described members  
57 of multiple novel genera, and the family *Muribaculaceae*, which has subsequently been reported by  
58 many.<sup>13</sup> Since 2016, others have gathered bacterial isolates from the mouse intestine, albeit focusing  
59 on the *ob/ob* mouse model commonly used to study metabolic diseases (mouse gut microbial biobank;  
60 mGMB)<sup>14</sup> or on functional differences between human and mouse gut microbiota (mouse  
61 gastrointestinal bacteria catalogue; MGBC).<sup>15</sup> Despite these studies, many bacterial species remain  
62 either undescribed or unavailable in international culture repositories. Moreover, the utility of strains  
63 from these other collections for functional studies has not been demonstrated experimentally. Here  
64 we report new taxonomic and functional bacterial diversity from the mouse intestine, including the  
65 descriptions of 39 novel taxa, the study of strain-level diversity, and small-sized bacteria. We also  
66 present proof-of-concept experiments using miBC strains for modular functional investigation of  
67 microbe-host interactions. These experiments show a direct role of certain bacterial species in  
68 modulating immune responses and open avenues for study-specific synthetic communities (SYNs) of  
69 mouse gut bacteria.

70

## 71 **Results**

72 *Expanding the cultured bacterial diversity from mouse gut microbiota*

73 Diversity within the original collection released in 2016<sup>12</sup> was doubled by including 112 bacterial  
74 strains, representing 73 fully-described species (reaching 141 species for the entire collection). This  
75 was achieved by obtaining isolates using different samples and culture conditions as specified in  
76 **Supplementary Table S1** and in the methods. The strains have been processed at international culture  
77 collections to guarantee long-term public availability. Their metadata and nucleotide sequences (near  
78 full-length 16S rRNA gene sequences and draft or closed genomes) can be accessed via the project  
79 repositories: [www.dsmz.de/miBC](http://www.dsmz.de/miBC) and <https://github.com/ClavellLab/miBC>. The phylogenomics and  
80 occurrence in the mouse gut of new collection members are depicted in **Fig. 1**. Diversity was enriched  
81 across all bacterial phyla, including multiple strains of *Mucispirillum schaedleri* within the phylum  
82 Deferribacteres. The collection represents a total of six phyla, dominated by Firmicutes, and 35  
83 families, dominated by *Lachnospiraceae* and *Lactobacillaceae*. Insights into novel bacterial diversity  
84 are presented in the next section. When several strains of the same species were obtained from mice  
85 of different origins, they were retained within the collection (**Supplementary Table S1**). In particular,  
86 due to the role of *Enterobacteriaceae* under dysbiotic conditions in multiple disease contexts,<sup>16-19</sup> we  
87 included 20 *Escherichia coli* isolates with various origins, genomic and phenotypic features. All *E. coli*  
88 strains fermented lactose, a hallmark of this species compared with neighbouring members of the  
89 genus *Shigella*. In contrast, they varied in their ability to express flagella and their susceptibility to  
90 infection by known and newly isolated lytic phages<sup>20</sup> (**Supplementary Fig. S1**). This toolbox will  
91 facilitate experiments to study community dynamics within SYNs at the strain level.

92 We then investigated how well the cultured isolates within miBC cover the mouse gut microbiota  
93 diversity as detected by sequencing. Analyses were performed in comparison with the two  
94 aforementioned resources of isolates recently published by others (mGMB and MGBC),<sup>14,15</sup> with the  
95 limitation that MGBC does not provide full-length 16S rRNA gene sequences. We observed that 73  
96 miBC isolates were shared with mGMB based on 16S rRNA genes at <98.7% sequence identity, yet  
97 miBC had almost twice as many isolates not accounted for by mGMB (134 vs. 77 sequences;  
98 representing 110 species) (**Fig. 2a**). A similar pattern was observed at the genome level (<95% ANI  
99 value), although the third collection MGBC contained an even greater number of unique isolates (n =  
100 141) (**Fig. 2b**). Significant overlaps between the three collections were observed, accounting for  
101 approximately half of the genomes within each resource. The 101 genomes unique to miBC  
102 represented 89 species-clusters (>=95% ANI). This indicates that expanding culture collections, as done  
103 here, is helpful not only for increasing strain-level diversity of isolates across different countries, but  
104 also to provide unique bacterial diversity not yet captured by others.

105 The cultured fraction of sequencing-based diversity was then assessed at three levels. First, using  
106 11,485 amplicon datasets of mouse gut samples retrieved from IMNGS (>5,000 high-quality 16S rRNA  
107 gene sequences per sample),<sup>21</sup> the median relative abundance accounted for by miBC was 36.2% at  
108 the genus and 27.0% at the species level (**Fig. 2c**). Compared with our original collection, this  
109 significantly improved coverage by 14.0% (genus) and 9.8% (species) (p<0.0001; Wilcoxon Rank-Sum).  
110 The coverage of the expanded miBC was also significantly better (p=0.002) than mGMB,<sup>14</sup> which  
111 covered 35.3% at the genus and 24.4% at the species level.

112 Second, we used 16S rRNA gene amplicon data from laboratory mice in different facilities and from  
113 wildling mice known to have a more diverse gut microbial ecosystem.<sup>22</sup> The microbiota structure of  
114 laboratory mice depended on both the facility and gut region considered (ileum and caecum)  
115 (**Supplementary Text** and **Supplementary Fig. S2**). We observed substantial shifts in diversity and  
116 composition after weaning, without further consistent changes due to ageing (up to 50 weeks)

117 compared with passive microbiota shifts within the given facility. The OTU coverage by miBC varied  
118 between facilities and was similar to mGMB in the small intestine (except in Facility 3), yet generally  
119 lower in the distal gut (**Fig. 2d-f**). This implies that several of the 134 isolates uniquely present in miBC  
120 represent taxa not captured by amplicon sequencing, either because they belong to sub-dominant  
121 populations or because some of them are generally missed by the method (*e.g.*, DNA extraction  
122 efficiency; see next section on small-sized bacteria). Nevertheless, the miBC-unique cultured species  
123 clearly increased the fraction of amplicon sequences covered by sequences from the isolates within  
124 mGMB alone (**Fig. 2d-f**; violet dots).

125 Third, functional coverage was assessed at the metagenomic level using a recently published gene  
126 catalogue of the mouse gut.<sup>23</sup> The expanded miBC collection covered 37.7% of all proteins in this  
127 dataset. When supplemented with the mGMB- and MGBC-derived genomes, a further 9.6% and 6.1%  
128 of proteins were accounted for, respectively (**Fig. 2g**). This means that miBC includes the majority of  
129 functions from bacterial strains cultured so far and that the three collections together cover over half  
130 (53.5%) of all functions detected by shotgun sequencing within the murine gut.

131

### 132 *Novel taxa and diversity of small-sized bacteria*

133 The present cultivation work allowed to discover 39 novel bacterial taxa, which were described using  
134 Protologger,<sup>24</sup> including taxonomic, ecological, and functional features based on near full-length 16S  
135 rRNA gene and genome sequences. Cell morphology was assessed by scanning electron microscopy  
136 (<https://github.com/ClavellLab/miBC>). These analyses led to the proposal of one novel family, 10 novel  
137 genera, and 39 novel species. Amongst them, the highest number of CAZymes was 410 in the genome  
138 of *Bacteroides muris*, suggesting that this species plays a role in carbohydrate degradation in the  
139 mouse gut. In contrast, the three novel *Adlercreutzia* species as well as *Anaerotardibacter muris* (all  
140 members of family *Eggerthellaceae*) had the lowest CAZymes repertoire ( $\leq 80$  enzymes per genome).  
141 The pathway for sulfate assimilatory reduction to sulfide (EC:2.7.7.4, 2.7.1.25, 1.8.4.8, 1.8.1.2) was only  
142 detected in *Neobacillus muris* and *Weizmannia agrestimuris* (novel species and genus, respectively,  
143 within family *Bacillaceae*). Whilst the species *Odoribacter lunatus* (family *Odoribacteraceae*, phylum  
144 Bacteroidetes), which forms peculiar crescent-shaped cells, was absent from any of the 11,845 16S  
145 rRNA amplicon datasets analysed, *Alistipes muris*, *Otoolea muris*, and *Senimuribacter intestinalis* were  
146 highly prevalence in the mouse gut ( $>50\%$  of samples positive for these species). Detailed information  
147 about all new bacteria obtained in this work is provided in **Supplementary Table S1** and in the  
148 protologues listed at the end of the methods section.

149 A specific protocol that we followed to successfully isolate novel bacteria was to pass gut suspensions  
150 through filters with a pore size of 0.45  $\mu\text{m}$  to select for small-sized cells. This proved to be efficient in  
151 obtaining not only several strains of the species *Mucispirillum schaedleri*, as reported previously,<sup>25</sup> but  
152 also three novel species distantly related to members of the family *Christensenellaceae*.<sup>26</sup> According  
153 to their phylogenomy (**Fig. 3a**) and additional taxonomic analyses (see protologues), these isolates are  
154 proposed to be the first cultured members of a novel family, for which the name *Pumilibacteraceae* is  
155 proposed. Whilst certain isolates obtained via this filtration protocol grew indeed as small cells only,  
156 *e.g.*, cocci with a diameter  $<0.5 \mu\text{m}$  in the case of strain CLA-AA-M08<sup>T</sup> (**Fig. 3b**), others formed thin but  
157 long cells or displayed a more classical morphology, albeit with marked inter-cell heterogeneity,  
158 possibly explaining why some cells could pass the filter during preparation (see electron micrographs  
159 under <https://github.com/ClavellLab/miBC>). All three *Pumilibacteraceae* species and  
160 *Anaerotardibacter muris* (novel genus within family *Eggerthellaceae*) require relatively long incubation

161 time to reach visible growth, are very sensitive to oxygen, and grow on agar medium only. A sufficient  
162 amount of genomic DNA could be obtained from *A. muris* only when additional enzymatic steps were  
163 included in the protocol, indicating that this species is difficult to lyse. Based on genome analysis, the  
164 three novel species within family *Pumilibacteraceae* were predicted to produce acetate, both from  
165 acetyl-CoA (EC:2.3.1.8, 2.7.2.1) and a combination of sulfide and L-serine (EC:2.3.1.30, 2.5.1.47).  
166 Moreover, they seem unable to utilise many carbohydrates, which co-occurred with a minimal  
167 CAZymes repertoire (<150 enzymes).

168 As a few intriguing isolates were obtained after 0.45 µm-filtration of gut content suspensions as  
169 presented above (**Supplementary Table S1**), we sought to characterise the diversity of such bacteria  
170 in a broader manner independent of the tedious handling and identification of single strains.  
171 Therefore, three freshly collected samples from laboratory mice were analysed by high-throughput  
172 16S rRNA gene amplicon sequencing either as such or after filtration and cultivation on three different  
173 agar media, each in triplicate (see Methods section and data in **Supplementary Table S2**). Cultures  
174 from unfiltered caecal slurries served as controls. The diversity of taxa detected as dominant members  
175 of cultured communities (>1 % relative abundance) is shown in **Fig. 3c**. Out of the 14 molecular species  
176 spanning four phyla that were obtained from filtered material, 10 were considered to represent novel  
177 taxa (values <97 % in brackets and bold letters in the tree), of which three corresponded to the pure  
178 cultures mentioned above and are described in this work (orange stars). Moreover, nine of the 14  
179 molecular species were exclusively present in the cultured communities obtained after filtration (see  
180 names and numbers in dark blue in **Fig. 3c** and **Fig. 3d**). These experiments demonstrate that easy-to-  
181 implement processing steps during sample preparation prior to cultivation allow the selection of  
182 specific taxa that would be otherwise too difficult to obtain directly from native communities. Whilst  
183 one of these small bacteria obtained as pure culture (no. 12, *Pumilibacter muris* CLA-AA-M08<sup>T</sup> within  
184 the proposed novel family) was recovered in all media of all three samples tested and occurred at a  
185 relative abundance of ca. 0.3 % in the original sample vs. up to >90 % after filtration (**Fig. 3d**), others  
186 occurred in only one instance from filtered material (one replicate of one of the media for one given  
187 sample; blue bars). This shows that increasing the scale of such a work will be necessary in the future  
188 to capture an even broader range of novel mouse gut bacteria.

189

### 190 *Metagenome-based design of synthetic communities (SYNs) to study differential host* 191 *responses*

192 To demonstrate the value of a well-curated collection of mouse gut bacterial isolates to perform  
193 functional experiments, we first adopted a modular approach for synthetic community (SYN) design to  
194 generate consortia that mimic differential metagenomic functions. In this example, we generated SYNs  
195 associated with host susceptibility to DSS-induced colitis. For this purpose, the genomic cultured  
196 diversity in miBC and in shotgun metagenomes previously generated from mice of different origins,  
197 and characterized by varying disease severity after DSS treatment,<sup>27</sup> were used as a foundation for  
198 data-driven SYN design using a modified version of our recently published bioinformatic workflow  
199 MiMiC (see methods).<sup>28</sup> The binary (presence/absence) metagenomic profiles of protein families  
200 (Pfam) from the original faecal samples were clearly distinct in mice susceptible to DSS colitis (**Fig.**  
201 **4a**). Whilst the two generated SYNs both consisted of species within the phyla Firmicutes and  
202 Bacteroidetes, their species composition differed markedly, with only two isolates being shared (**Fig.**  
203 **4b**). This difference was less pronounced at the functional level, with 898 Pfams being unique and

204 3,985 shared between the two consortia, **Fig. 4c**. However, these unique functions were important  
205 enough to cause each consortium to better cover the respective samples they were derived from (**Fig.**  
206 **4d**), especially in the case of mice resistant to DSS colitis where R-syn covered 4% additional functions  
207 than S-syn. When mapped to KEGG, these differences in Pfam coverage translated to a greater range  
208 of functional modules (231 vs. 220) and a greater metabolic capacity (metabolic pathways (map01100);  
209 922 KOs vs. 865). This implies that the loss of commonly present functions (Pfams unique in  
210 metagenomes linked to the resistant phenotype) was partly responsible for the susceptibility to  
211 inflammation in this DSS model. Separation of the SYNs was also clearly observed on the  
212 multidimensional scaling plot and imitated the profiles of the original samples (**Fig. 4a**). SCFAs have  
213 long been known to impact gut health and both butyrate and propionate have been shown to improve  
214 resistance to DSS-induced colitis.<sup>29,30</sup> In general, multiple pathways were observed to be less  
215 fragmented within the R-syn than S-syn. For instance, whilst both communities contained enzymes  
216 involved in the production of butyrate and propionate, more complete KEGG pathways were observed  
217 in the R-syn (propionate (map00640), 36 vs. 28; butyrate (map00650), 38 vs. 33). Propionate  
218 production could be followed from either succinate or glycerone phosphate to propanoyl-CoA in R-  
219 syn, which leads to three possible routes for propionate production, while both pathways for  
220 propanoyl-CoA production were incomplete in S-syn.

221

#### 222 *Colonization profiles of a new reference SYN*

223 A few low-diversity mouse microbiota used as reference gut communities have been published to  
224 date,<sup>31-33</sup> including the Oligo-Mouse Microbiota (OMM). The original OMM consists of 12 bacterial  
225 strains from the mouse intestine, herein termed OMM12.<sup>31</sup> OMM12 has been used multiple times as  
226 described or complemented with one or more additional strains to study either microbe-host  
227 interactions or the ecosystem itself under controlled conditions, demonstrating the usefulness of such  
228 experimental models.<sup>20,34-39</sup> However, due to the absence of important microbial functions in the  
229 OMM12, we selected additional phylogenetically and functionally diverse species from miBC to create  
230 the OMM19.1 model. We subsequently performed gnotobiotic experiments in two mouse facilities to  
231 validate colonization profiles and to study differential effects on the host. The selected strains and  
232 their features are presented in **Supplementary Fig. S3**. Ready-to-use strain mixtures of both OMM12  
233 and 19.1 are publicly available for further use ([www.dsmz.de/miBC](http://www.dsmz.de/miBC)).

234 Three sets of experiments were performed to test colonization by the OMM19.1 strains: (1) targeted  
235 colonization of germfree mice after weaning in gnotobiotic facility A (Aachen, Germany) to test  
236 engraftment in different gut regions; (2) colonization from birth using a breeding scenario in the same  
237 facility to test vertical transmission; (3) colonization after weaning in an independent gnotobiotic  
238 facility B (Hannover Medical School, Germany) to validate results. Bacterial composition was  
239 monitored by 16S rRNA gene amplicon sequencing with confirmation by qPCR for ileum and colon  
240 samples in colonization trial 1. All but one of the OMM19.1 species, *Flintibacter butyricus*, colonized  
241 the mice successfully, at varying relative abundances depending on gut regions (**Fig. 5a** and  
242 **Supplementary Fig. S4**). Stable colonization by *Extibacter muris* and *Escherichia coli* in this model  
243 agrees with previous findings.<sup>34,37</sup> The relative abundance of *Bacteroides caecimuris*, a dominant  
244 member in the caecum and colon of OMM12 mice, was consistently reduced by colonization of the  
245 OMM19.1 strains, most likely due to the addition of *Parabacteroides goldsteinii* and *Xylanibacter*  
246 *rodentium*, two members of the same order (*Bacteroidales*) which were the most abundant OMM19.1

247 strains in the distal gut. In the small intestine, the dominance of *Akkermansia muciniphila* in OMM12  
248 mice was apparently affected by colonization with *Ligilactobacillus murinus*. Interestingly,  
249 *Enterococcus faecalis* was not detected by both amplicon sequencing and qPCR in the intestine of  
250 OMM19.1, even though it was present in all three gut regions in OMM12 controls, suggesting that this  
251 species was affected by the added strains. Colonization by *M. schaedleri* in the colon of OMM19.1 mice  
252 (sporadically in the small intestine) was not seen in sequencing data but was confirmed by qPCR, albeit  
253 at low relative abundances (**Supplementary Fig. S4**). This agrees with the preferred habitat of this  
254 species being mucosa-associated areas.<sup>40</sup> *Bifidobacterium animalis* was also detected in the colon of  
255 OMM12 mice by qPCR, but not in OMM19.1 counterparts.

256 Vertical transmission of the OMM19.1 members was confirmed for 15 of the 16 strains detected in the  
257 caecum of F0-mice and mean relative abundances across OMM19.1 members were altogether stable  
258 (**Fig. 5b**). *Muribaculum intestinale*, which was previously shown to be sensitive to colonization  
259 protocols,<sup>41</sup> could not be detected by amplicon sequencing after breeding; *E. faecalis* was also not  
260 detectable anymore in OMM12 mice of the F1 generation. In contrast *M. schaedleri* was present in F1-  
261 mice although detected only by qPCR in F0-controls. Colonization profiles in the caecum of mice from  
262 a second facility confirmed the presence of all dominant members of the OMM19.1 communities (**Fig.**  
263 **5c**). The following species, detected at low relative abundances in the first facility, were absent in the  
264 second, although colonization in other gut regions was not tested and qPCR was not performed:  
265 *Flavonifractor plautii*, *Clostridium ramosum*, *E. faecalis*, *M. schaedleri*. In summary, whilst it is expected  
266 that colonization profiles in future experiments may vary between gut regions and facilities (*e.g.*,  
267 differences in diet and other environmental factors) and depend on the method used for detection,  
268 providing standardized stocks as a starting point for colonization and using validated colonisation  
269 protocols<sup>41</sup> reduce the risk of variations. Moreover, such stocks delivered robust profiles for dominant  
270 members of the communities (>1 % relative abundance) in our experiments.

271

## 272 *Differential effects on the host*

273 To compare effects of the different types of microbial communities on the host (OMM12 and  
274 OMM19.1 vs. germfree (GF) and specific pathogen-free (SPF) controls), mice colonized after weaning  
275 in facility A were phenotyped via body imaging and immune cell profiling in the intestinal lamina  
276 propria (LP) and gut-associated lymphoid tissues (GALT) by flow cytometry. For many of the  
277 parameters, OMM19.1 mice showed an intermediate state between OMM12 and SPF controls, even  
278 though results did not reach statistical significance for several single parameters due to inter-individual  
279 variabilities (**Fig. 6**). In contrast to an expected decrease in caecum weight due to colonization (**Fig. 6a**),  
280 total body weight and fat content were not different between groups (**Fig. 6a** and **6b**). However,  
281 interesting findings included increased heart and lung volume, as well as an increase in femur density  
282 (but not length) (**Fig. 6b**). In terms of immune readouts (**Fig. 6c** and **Supplementary Fig. S5**), most  
283 notable changes were observed in T cell subtypes and IgA<sup>+</sup> plasma cells in various LP and GALT  
284 compartments. Whilst the overall proportion of CD4<sup>+</sup> T cells did not differ between the groups,  
285 phenotypic composition of these cells was altered by the microbiota. RORγt<sup>+</sup> CD4<sup>+</sup> Th17 cells were  
286 nearly absent in GF mice but their prevalence increased with complexity of the microbiota in both LP  
287 and GALT. The fraction of Foxp3<sup>+</sup> Tregs in the SI and mesenteric lymph nodes (MLNs) did not change  
288 with colonisation status but was increased in the colonic LP of colonised mice. Notably, within the  
289 Foxp3<sup>+</sup> Treg population, RORγt-expressing Tregs were increased in OMM-19.1 mice in all

290 compartments compared with GF and OMM-12 controls. Similarly, there was an overall increase in the  
291 frequency of IgA+ plasma cells in both intestinal LP compartments, with OMM-19.1 mice showing  
292 intermediate values between the OMM-12 and SPF groups. Few differences were observed in the  
293 proportion of other innate and adaptive immune cell populations (**Supplementary Fig. S5**).

294 Taken together, this work provides access to strains and mixed consortia allowing for targeted  
295 colonization studies in gnotobiotic mice. Body composition and immune parameters demonstrated  
296 that implementing the OMM12 model with additional strains and their functions contributed to  
297 inducing host responses closer to conventionally colonized mice.

298

299

## 300 Discussion

301 Mouse models are widely used in fundamental and clinical research. It is thus important to characterize  
302 in detail the factors that modulate their physiology, such as the gut microbiota. Despite work in the  
303 last five years,<sup>12,14,15</sup> the diversity of yet-uncultured bacteria from the mouse intestine is still high,  
304 which hinders further advances in the field. Establishing state-of-the-art collections of mouse gut  
305 bacteria is a tedious endeavour due to the high-quality standards that are difficult to comply with and  
306 followed by very few. The final resource must be well curated, and the isolates must be made publicly  
307 available at the time of publication and, in the best case, fully characterized taxonomically. The present  
308 work aims towards these goals. Moreover, it provides insights into the contribution of isolates to  
309 pathophysiology of the host.

310 The expanded range of bacterial diversity within miBC makes new strains available to perform  
311 experimental studies more easily. For instance, *Mucispirillum schaedleri* was already included in  
312 altered versions of the Schaedler Flora,<sup>33</sup> but access of this species has been problematic since then.  
313 The new strains provided here will help to further elucidate its ecology (*e.g.*, enrichment in the  
314 intestine of rodents), lifestyle, and role in inflammation and resistance to infections.<sup>42</sup> Compared with  
315 other published resources,<sup>14,15</sup> we aim to provide detailed information on novel taxa and eventually  
316 validate their names to generate added value for the community. Our collection includes multiple  
317 novel species within important bacterial groups in the mouse gut, such as the *Muribaculaceae*,  
318 *Coriobacteriales*, or *Clostridiales*.<sup>2,13</sup> Whilst this taxonomic distribution agrees overall with the diversity  
319 of isolates provided by others,<sup>14,15</sup> each collection brings unique diversity to light. The present work  
320 reports full-description of 39 novel taxa, including one new family represented by small-sized bacteria.

321 There are only a few examples of synthetic communities (SYNs) from the mouse intestine that have  
322 been established and used since the 1960s.<sup>31-33</sup> Such models can be implemented in two manners: (I)  
323 as reference communities to perform gnotobiotic studies under controlled and reproducible  
324 conditions,<sup>32,38</sup> or (II) as modular systems to test the effects of specific strains added to the  
325 community.<sup>34,37</sup> By amending the original OMM12 model via the addition of phylogenetically and  
326 functionally complementary strains and by making the corresponding strains mixtures and all single  
327 miBC strains available, the work presented here facilitates both types of models aforementioned.  
328 Previous work has highlighted the link between the gut microbiota and growth of the host, including  
329 bone-related parameters, especially under malnutrition.<sup>43,44</sup> We found that increasing bacterial  
330 diversity of the OMM model to 19 strains shifted body composition towards the phenotype of  
331 conventionally colonized mice, including femur density and the size of several organs. A recently



332 published community of 15 mouse isolates (GM15), which also included four miBC strains, was shown  
333 to increase femur length to values observed in OMM12 and SOPF/SPF controls.<sup>32</sup> However, this  
334 community is not publicly available. Previous work pointed at the role of lactobacilli in maintaining  
335 growth of infant mice during chronic undernutrition.<sup>44</sup> Whilst GM15 and OMM19.1 have two species  
336 within family *Lactobacillaceae* in common (*Limosilactobacillus reuteri* and *Ligilactobacillus murinus*),<sup>45</sup>  
337 additional work will be needed to dissect the role of single OMM19.1 members in the phenotypes  
338 observed.

339 The bacterial strains used to establish the OMM19.1 model influenced immune cell populations in  
340 GALT, especially ROR $\gamma$ t+ T cells and IgA+ plasma cells. It is sound to ask whether these effects are due  
341 to the increased diversity *per se* or to specific functions of the added strains. Some bacteria, particularly  
342 those associated with the intestinal epithelium, were reported to effectively induce adaptive immune  
343 responses, notably IgA production and ROR $\gamma$ t+ T cell priming.<sup>46,47</sup> Moreover, microbial colonisation is  
344 known to stimulate the maturation of germinal centres in GALT, resulting in the accumulation of IgA  
345 somatic mutations that influence microbiota reactivity.<sup>36,48</sup> Recent studies highlighted the importance  
346 of secondary bile acids produced by gut bacteria in regulating the maturation and functions of Treg  
347 and Th17 populations.<sup>49-51</sup> *Extibacter muris* is such a bacterium within OMM19.1 capable of producing  
348 secondary bile acids by 7 $\alpha$ -dehydroxylation.<sup>37</sup> Another recent study reported high induction of ROR $\gamma$ t+  
349 Tregs by the species *Clostridium ramosum*, which is also a member of OMM19.1.<sup>52</sup> The fraction of IgA+  
350 plasma cells was very low in the colon of GF mice and expanded substantially due to colonisation. The  
351 role of these and other bacteria<sup>53</sup> in conferring the differential effects observed between OMM12 and  
352 19.1 at the level of immune cells will be worth investigating in the future.

353 Variations in the gut microbiota of mouse models, *e.g.*, due to the origin of mice, has been shown to  
354 markedly influence immune responses and the susceptibility of mice to DSS-induced colitis.<sup>27,54</sup>  
355 Approaches used so far to design the composition of SYNs has primarily been taxa-centric, *i.e.*, based  
356 on expert knowledge of the diversity and functions of isolates that are easy to culture. In a yet  
357 unpublished work, phenotype variations in the DSS-induced colitis model were investigated at a large-  
358 scale, emphasizing again the importance of gut microbes in this model.<sup>55</sup> This study followed also a  
359 taxa-centric approach to identify novel species within the genera *Duncaniella*<sup>13</sup> and *Alistipes*<sup>56</sup> that play  
360 a role in disease onset. We here propose a function-based approach that, independent of taxonomic  
361 boundaries and based on the functional landscape within host-specific collections of isolates, provides  
362 SYN compositions that reflect dysbiotic conditions captured by shotgun sequencing. The biological  
363 relevance of such SYNs designed using individual metagenomic data remains to be tested in future  
364 studies. Whilst the relatively low diversity within SYNs is a limiting factor when compared to stool-  
365 derived *in vitro* communities,<sup>57</sup> working with a controlled system is an important advantage. Moreover,  
366 such approaches based on custom-made SYNs adapted to the needs of specific studies will gain in  
367 power proportionally to further expansion of isolate collections.

368 In conclusion, the resource presented here provides multiple novel insights into the mouse gut  
369 microbiota that will hopefully facilitate the work by others on microbe-host interactions in health and  
370 disease. Next steps include further technical developments (both wet lab and *in silico*)<sup>24,58</sup> to enhance  
371 the throughput and optimize the in-to-output ratio of cultivation approaches, especially regarding  
372 rapid and precise identification of isolates. Large-scale cultivation studies<sup>5</sup> still report a low depth of  
373 cultivation per individual sample, and yet-unpublished work on the development of high-complexity  
374 SYNs<sup>59</sup> is based on isolates of various origins. Further efforts are thus required to reach the goal of  
375 personalized microbiome-based research and applications using isolates.

376

## 377 **Methods**

### 378 **Samples and culture media for bacterial isolation**

379 Samples were collected from mice euthanized for scientific procedures in accordance with the German Animal Protection  
380 Law (TierSchG). The internal animal care and use committee (IACUC) at the University Hospital of RWTH Aachen approved  
381 the collection of gut content from donor mice not subjected to any experimental treatment (internal approval no. 70018A4).  
382 Gut content was also collected in the context of studies otherwise ethically approved by the federal authority (Landesamt für  
383 Natur, Umwelt und Verbraucherschutz, North Rhine Westfalia, LANUV; approval no. 81-02.04.2020.A131 and 81-  
384 02.04.2019.A065). Particular attention was paid by the experimenters during dissection and sampling to reduce the risk of  
385 potential contaminations by bacteria from the environment (e.g., use of sterile materials only, disinfected dissection set,  
386 thorough disinfection of the dissection area and the mice prior to dissection). Gut contents were collected into 2ml Eppendorf  
387 tubes immediately after culling and brought into an anaerobic workstation (MBraun, Garching, Germany) with an atmosphere  
388 consisting of 4.7 % H<sub>2</sub> and 6 % CO<sub>2</sub> in N<sub>2</sub> and a partial pressure of oxygen <0.1 ppm. The list of culture media used in this study  
389 and their compositions are provided in **Supplementary Table S1**.

390

### 391 **Bacterial isolation and characterization**

392 Sterile agar media were placed in the anaerobic workstation at least 24 hours before use. Fresh gut contents were re-  
393 suspended (1:10 wt/vol) in anaerobic, reduced (0.05% L-cysteine, 0.02% DTT) phosphate-buffered saline (PBS). The  
394 suspensions were then serially diluted in PBS down to 10<sup>-6</sup>. Each dilution was plated onto the agar media and incubated at 37  
395 °C for up to 7 days. Single colonies were picked and re-streaked three times onto fresh agar plates to guarantee purity of the  
396 isolates. The strains were first identified using a MALDI-Biotyper (Bruker Daltonik), following the manufacturer's instructions.  
397 For isolates not identifiable at the species-level by MALDI (score <1.7) or identified as species not yet contained in the original  
398 collection,<sup>12</sup> the 16S rRNA gene was sequenced. Genes were amplified by PCR using primer 27f and 1492r.<sup>60</sup> PCR products  
399 were purified and sent for Sanger sequencing at Eurofin Genomics (Ebersberg, Germany) or Microsynth SeqLab (Göttingen,  
400 Germany) using primer 27f, 1492r, 338r, and 785r. The raw sequences were first checked and modified manually  
401 with help of the electropherograms prior to building contigs to obtain near full-length 16S rRNA gene sequences.  
402 The most closely related species with a valid name were identified using Ezbiocloud.<sup>61</sup> A cut-off value of 98.7% was used as a  
403 first layer of delineation between known and novel species.<sup>62</sup>

404 For phage infection assays, *E. coli* strains were incubated in BHI medium overnight at 37 °C and 100 µl of biomass was plated  
405 onto LB agar plates. After drying, 2.5 µl of phage lysate dilution series (in BHI medium down to 10<sup>-7</sup>) were pipetted onto the  
406 plate, each dilution in triplicate. After overnight incubation at 37 °C, productive lysis by the phages was observed visually by  
407 the appearance of individual plaques within the spotting zone at appropriate phage dilutions. For the assays with phage  
408 Mt1B1\_P3, Mt1B1\_P10 and Mt1B1\_P17,<sup>20</sup> the bacteria were streaked on LB agar plates from frozen stocks. After overnight  
409 incubation at 37°C, single colonies were resuspended in 90µl LB Medium of which 20µl were immediately streaked onto EBU  
410 (Evans blue, uranine) agar plates. After drying, 5µl of the phage lysates were spotted in duplicate and incubated overnight at  
411 37°C. Bacterial lysis was observed visually by the appearance of plaques and colour change to a darker green of the agar plate  
412 around the spot. All *E. coli* strains were also further analysed using EnteroPluri-Test (Liöfilchem®) to test for substrate  
413 utilisation. Single colonies from freshly grown strains on BHI agar were used for inoculation using sterile needles. The tests  
414 were visually assessed after incubation at 37 °C for 24 h according to the manufacturer's instructions.

415

### 416 **Strain processing at the DSMZ**

417 After shipment as live cultures at room temperature or cryo-stocks on dry ice, strains were cultured and quality checked  
418 following standard operating procedures at the Leibniz Institute DSMZ using the strain-specific conditions specified on the  
419 website ([www.dsmz.de/miBC](http://www.dsmz.de/miBC)). Purity was confirmed by re-streaking whenever possible, visual observation of colony  
420 morphologies, and microscopic observation of cells. Isolates were assigned unique collection numbers and they were kept  
421 either as cryo-stocks in capillaries stored in liquid nitrogen or in lyophilized form using glass ampoules stored at 4 °C for long-  
422 term storage. The Oligo-Mouse Microbiota (OMM) strain mixtures (OMM10-basis; extension set 1.2; extension set 2.9) were  
423 prepared in an anaerobic workstation by mixing equal volumes of the corresponding strains freshly cultured separately under  
424 appropriate anaerobic conditions. The final stocks contained 12% glycerol as a cryo-protectant and were stored at -80 °C in  
425 crimp closed glass vials (Macherey-Nagel, ref. no. 70201HP and 70239).

426

### 427 **Flagellin assays**

428 The Flagellin Bioactivity Assay was modified from a method described previously.<sup>63</sup> HEK-Blue™-hTLR5 cells were used, which  
429 were generated by co-transfection of the human TLR5 gene and an inducible SEAP (secreted embryonic alkaline phosphatase)

430 reporter gene into HEK293 cells. The SEAP gene is placed under the control of the IFN- $\beta$  minimal promoter fused to five NF-  
431  $\kappa$ B and AP-1-binding sites. Stimulation of the TLR5 receptor by ligands, such as flagellin, activates NF- $\kappa$ B and AP-1, which  
432 induce the production of SEAP. Activity is determined using QUANTI-Blue<sup>TM</sup> (Invivogen), with a change from pink to purple-  
433 blue colour indicating a positive reaction and thus TLR5 induction. Cells resuspended in maintenance medium (per litre of  
434 DMEM without L-glutamine: 100 mL heat-inactivated FCS, 1 mmol L-glutamine, 5 mL Pen/Strep, 200  $\mu$ L normocin, 300  $\mu$ L  
435 blasticidin, 100  $\mu$ L zeocin) were pipetted into wells of a 96-well plate at a density of ca.  $2.5 \times 10^4$  cells per well. The *E. coli*  
436 strains used in these experiments are listed in **Supplementary Table S1** and presented in **Supplementary Fig. S1**. Suspensions  
437 of freshly grown *E. coli* strains in BHI medium ( $OD_{600}$ , 0.5) were diluted 100-fold and 20  $\mu$ l were added to the HEK-cells in  
438 triplicates. FLA-ST, standard flagellin from *Salmonella enterica* Typhimurium (Invivogen), was used to generate a standard  
439 curve (10-200 ng/ml). BHI medium without bacteria was used as a negative control. The plates were incubated at 37 °C under  
440 an atmosphere containing 5% CO<sub>2</sub> for 21 h and then centrifuged (100 x g, 4 °C, 5 min). Supernatants (20  $\mu$ l) were added to  
441 180  $\mu$ l of QUANTI-Blue<sup>TM</sup> (Invivogen) and incubated for 45 minutes. SEAP activity was measured at 630 nm using a microplate  
442 reader. The assay was repeated three times for each strain.

443

#### 444 **Genome sequencing and analysis**

445 The biomass of freshly grown isolates revived from frozen glycerol stocks was collected from liquid media or agar plates. The  
446 DNA was isolated using a modified version of the method by Godon et al. (1997).<sup>64</sup> Cells were lysed by bead-beating in the  
447 presence of DNase inhibitor and detergent, then purified on NucleoSpin gDNA Clean-up columns (Macherey-Nagel,  
448 Germany). For isolates that were hard to lyse (e.g., CLA-AA-M13), additional enzymatic steps with lysozyme (Carl Roth, ref.  
449 8259.1; 3 mg/L; 37 °C, 30 min) and proteinaseK (Carl Roth, ref. 7528.1; 500 mg/L; 50 °C, 1-2 h) was added prior to bead-  
450 beating. DNA integrity was checked by gel electrophoresis and concentration was measured using a Qubit fluorometer  
451 (Thermo Fischer Scientific, USA).

452 DNA libraries were prepared with the NEBNext Ultra II FS DNA Library Prep Kit for Illumina (NEB, USA) according to the  
453 manufacturer's protocol using ~300 ng of DNA. The time used for enzymatic shearing to ca. 200 bp was 30 minutes. The PCR  
454 enrichment of adaptor-ligated DNA was conducted with five cycles and NEBNext Multiplex Oligos for Illumina (NEB, USA) for  
455 paired-end barcoding. For size selection and clean-up of adaptor-ligated DNA, AMPure beads (Beckman Coulter, USA) were  
456 used. Quality check (Bioanalyzer System, Agilent Technologies, USA) and DNA quantification (Quantus, Promega, USA) of  
457 resulting libraries were conducted at the IZKF Core Facility (UKA, RWTH Aachen University), as was the sequencing on a  
458 NextSeq500 (Illumina, USA) with a NextSeq500 Mid Output Kit v2.5 (300 Cycles).

459 Raw reads were quality-filtered and adapters as well as phiX reads were removed using Trimmomatic v0.39<sup>65</sup> and bbduk.<sup>66</sup>  
460 Assemblies were obtained using SPAdes v3.13.1.<sup>67</sup> Any contigs shorter than 1000nt were removed before quality check using  
461 CheckM.<sup>68</sup> Genomes were deemed to be of high quality when >95% complete and containing  $\leq$ 5% contamination. The N50,  
462 longest contig, shortest contig, total number of contigs and coverage were calculated using the 'Assembly\_stats.py' code  
463 available at: <https://github.com/thh32/Assembly-stats>. Comparison to both mGMG<sup>14</sup> and MGBC<sup>15</sup> was done using all publicly  
464 available genomes at the time of analysis (October 2021). This consisted of 108 genomes for the mGMB collection, each  
465 representing a different species, and 276 for the MMGC collection, representing 132 species. Comparisons between 16S rRNA  
466 gene sequences was conducted using the code within Protologger<sup>24</sup> with matches determined at 98.7% similarity. Genome  
467 comparison was conducted using FastANI using a match threshold of 95%.<sup>69</sup>

468

#### 469 **Ageing mouse dataset**

470 To accurately determine the cultured fraction of gut microbiota from laboratory mice (specific pathogen-free, SPF; C57BL/6  
471 wildtype mice), the content of the small intestine and caecum from animals in two facilities were sampled at different ages:  
472 3 weeks, 4 weeks, 15 weeks, and 50 weeks (Facility 2, Munich) or 45 weeks (Facility 3, Hannover). To avoid cage and litter  
473 effects, several litters and cages were sampled at each time-point. Moreover, to account for natural microbiota drifts within  
474 each facility over time, additional 10-week-old mice were used as controls and sampled at the earliest and latest time point.  
475 Routine microbiological monitoring allowed excluding infections by common murine pathogens.<sup>70</sup> These experiments did not  
476 include any interventions on the mice, which were housed in controlled environments with water and standard chow diets  
477 provided *ad libitum*. All procedures were in accordance with the German Animal Welfare Legislation. For experiments in  
478 Facility 2, the breeding and sampling of wildtype animals for scientific purposes was according to Paragraph 4, Section 3, and  
479 did not require specific approval due to the absence of intervention. Use of the animals was documented in the yearly animal  
480 records sent to the authorities. Breeding and housing of the mice in the facility fulfilled all legal requirements according to  
481 Paragraph 11, Section 1, Sentence 1. For experiments in Facility 3, the procedures were approved by the local Institutional  
482 Animal Care and Research Advisory Committee and covered by the permission of the local veterinary authority (reference  
483 no. 2015/78).

484

#### 485 **Mouse experiments with Oligo-Mouse Microbiota (OMM)**

486 Experiments in gnotobiotic facility A (University Hospital of RWTH Aachen, Germany):

487 All experiments were performed under Ethical Approval LANUV no. 81-02.04.2019.A065 in accordance with EU regulation  
488 2010/63/EU. All mice used were bred in germfree (GF) isolators (NKPIsotec, Flexible film isolator type 2D) under sterile  
489 conditions. To obtain specific-pathogen free (SPF) mice with the same genetic background (C57BL/6N) as their GF  
490 counterparts, mice were taken from the isolator and housed with SPF mice, allowing passive colonisation with a complex  
491 microbiota. The first generation of conventionalised mice after breeding were taken for use in this work. The initial main  
492 cohort of mice were fed *ad libitum* using autoclaved (134 °C, 20 min) fortified standard chow (ssniff V1534-300) and given  
493 autoclaved water (pH 7), with F1 generation mice fed on irradiated fortified chow instead (ssniff V1124-927). GF mice were  
494 removed from breeding isolators at 5 weeks of age and housed in HEPA-filtered bioexclusion isocages (Techniplast ISO30P).  
495 In both isolators and isocages, Tek-Fresh bedding (ENVIGO) was used. Mice were housed in single sex cages in the same room.  
496 Room temperature was kept between 21-24 °C and 25-40% humidity on a 12h:12h day:night cycle. Faecal samples were taken  
497 before starting experiments to confirm the GF status via microscopic observation after Gram-staining and plating on both  
498 anaerobic and aerobic agar plates.

499 To assess effects of the OMM19.1 consortium (n = 16 mice) on the host, it was compared to OMM12 (n = 22), GF (n = 20) and  
500 SPF (n = 23) controls. Each gnotobiotic group was created using age-matched GF mice, including animals from several litters  
501 and cages to account for potential confounding effects. The OMM-stocks (prepared as described above) were introduced  
502 orally by gavage (50 µl per mouse), followed by 100 µl rectally. A fresh aliquot was used for each cage, as recommended  
503 previously.<sup>41</sup> The second dose was given after 72hrs. SPF controls (also age-matched) were taken from the conventionalised  
504 C57BL/6N sister line. OMM19.1 and -12 mice were also bred under gnotobiotic conditions to assess colonization profiles after  
505 vertical transmission. All mice were culled at the age of 13 weeks, *i.e.*, after 8 weeks of colonization for gavaged mice. Gut  
506 content from the small intestine, caecum, and colon was collected for bacterial composition analysis by 16S rRNA gene  
507 amplicon sequencing and quantitative PCR (qPCR). Body imaging was carried out as described below. Small intestinal and  
508 colonic tissues as well as mesenteric lymph nodes (MLNs) and Peyer's patches (PPs) were collected during dissection and  
509 processed immediately for immune phenotyping by flow cytometry, as described below.

510 Experiments in Gnotobiotic Facility B (Institute for Laboratory Animal Science, Hannover Medical School, Germany):

511 This study was conducted according to the German animal protection law and European Directive 2010/63/EU. All  
512 experiments were approved by the Local Institutional Animal Care and Research Advisory committee and permitted by the  
513 Lower Saxony State Office for Consumer Protection and Food Safety (LAVES; file no. 18A367 and 2018/188). GF male and  
514 female C57BL/6JZtm mice were obtained from the Central Animal Facility (Hannover Medical School, Hannover, Germany).  
515 They were maintained in plastic film isolators (Metall+Plastik GmbH, Radolfzell-Stahringen, Germany) in a controlled  
516 environment and twelve-hour light/dark cycles. Hygiene monitoring according to standard operating procedures<sup>70,71</sup>  
517 confirmed that the mice were free of contaminants or infection with common murine pathogens throughout the experiment.  
518 GF mice (n = 3 males and 3 females per group) were removed from the breeding isolator at the age of five weeks and colonized  
519 with the corresponding OMM stocks, SPF microbiota, or left untreated (GF controls). Colonization occurred twice, 3 days  
520 apart, using 50 µl orally and 100 µl rectally of fresh OMM stocks. One OMM aliquot was used for each cage. The SPF group  
521 was colonized by following the same procedure but using freshly prepared caecal slurries from SPF, C57BL/6J mice. After  
522 colonization, mice were kept in airtight cages with positive pressure (IsoCage P, Techniplast Deutschland GmbH, Bavaria,  
523 Germany) and received pelleted 50 kGy gamma-irradiated feed (Sniff) and autoclaved water *ad libitum*. Each group was  
524 created using age-matched GF mice, including several litters and cages to account for potential confounding effects. Mice  
525 were culled via CO<sub>2</sub> inhalation followed by exsanguination at 13 weeks of age (8 weeks post inoculation) and caecal samples  
526 were collected to measure bacterial colonisation by amplicon sequencing.

527

## 528 **Body imaging**

529 On the day of sampling, mice were weighed, anaesthetised with 2% isoflurane in air, and imaged using a micro-computed  
530 tomography device (U-CT, MILabs B.V.). Ultra-focus fast scan mode with a resolution of 0.16 mm x 0.16 mm x 0.16 mm, tube  
531 voltage of 65 kV, tube current of 0.13 mA and a scan time of 27 s was used for fat analysis. Ultra-focus normal scan mode was  
532 used to segment organs and bones. The resolution was the same but tube voltage, tube current and scan time were 55 kV,  
533 0.17 mA and 3 min 42s, respectively. All µCT Scans were reconstructed by MILabs Auto Rec 1.6, organs and fat were  
534 segmented using Imalytics Preclinical 2.1.9.11 (Gremse-IT).<sup>72</sup>

535

## 536 **Immune cell phenotyping by flow cytometry**

537 Intestinal tissues were cut longitudinally and washed in HBSS/3% FCS (Hank's Balanced Salt Solution/Foetal Calf Solution) to  
538 remove any gut content. Peyer's patches (PPs) were removed for separate analysis and excess fat was cut away. Small  
539 intestine (SI) and large intestine (LI) were cut into 5-mm sections and shaken vigorously in HBSS 2 mM EDTA to remove  
540 epithelial cells. Samples were then incubated at 37 °C with shaking for 20 min, after which they were filtered through a 50µm  
541 Nitex mesh (Sefar) and the supernatant discarded. The remaining sample was washed with HBSS. These steps were repeated  
542 again using fresh HBSS 2mM EDTA. A final rinse using HBSS was performed to remove trace amounts of EDTA and filtered  
543 through the Nitex mesh. Depending on the tissue being studied, one of the following methods was used: (i) for the isolation  
544 of leukocytes from the lamina propria (LP) of SI, the tissue was placed in 15ml RPMI containing 1mg/ml collagenase VIII

545 (Sigma, C2139-1G); (ii) for colonic tissue (LI), a mix of enzymes was used (collagenase V, Sigma, C9263-1G, 0.85 mg/ml;  
546 Collagenase D, Roche, 11088882001, 1.25 mg/ml; dispase, Gibco, 17105-041, 1 mg/ml; DNase, Roche, 101104159001,  
547 30µg/ml). Tissues were then incubated at 37 °C with shaking for at least 15 min and manually shaken every 5 minutes until  
548 complete digestion. Tubes containing the tissue were then placed on ice, filtered through a 100-µm cell strainer, and  
549 centrifuged (400 x g, 6 min).

550 For mesenteric lymph nodes (MLNs), after removal of any remaining fat, they were placed in a 1.5-ml sample tube containing  
551 500 µl RPMI (without FCS) and cut into small pieces. 500 µl FCS free RPMI containing 2 mg/ml Collagenase D were added to  
552 each tube (end concentration 1 mg/ml). Tissue was incubated at 37°C for 45 min under constant shaking. The cells were  
553 strained through a 100 µm cells strainer into a 50 ml tube, washed with PBS/3% FCS and centrifuged (400 x g, 6 min, 4°C).

554 PPs were excised from the SI and digested (37 °C, 45 min) using 100 µg/ml liberase TH/DNase (Roche) in RPMI containing 5  
555 % FCS. Mononuclear phagocytes were enriched by MACS using CD11c magnetic beads (Miltenyi) according to the  
556 manufacturer's protocol. The CD11c negative fraction was used for subsequent analysis of B and T cells.

557 Flow cytometry staining and analysis was performed at the IZKF Flow Cytometry Core Facility of the RWTH University Hospital.  
558 For surface staining, single cell suspensions from SI, colon, MLNs and PPs were centrifuged (400 x g, 6 min) and resuspended  
559 in PBS/3% FCS containing a mix of fluorescently labelled antibodies for identification of different cell populations. Antibodies  
560 against mouse Ly6c (HK1.4), MHCII (M5/114.15.2), Ly6G (1A8), CD11b (M1/70), B220 (RA3-6B2), CD19 (6D5), CD64 (X54-  
561 5/7.1), CD103 (2E7), CD11c (N418), CD4 (RM4-5), CD8α (53-6.7), TCRβ (H57-597), TCRγδ (GL3) were purchased from  
562 BioLegend, IgA (mA-6E1) from eBioscience and CD45 (30-F11) from BD. Cells were stained with 7-AAD for viability (Biolegend).

563 For intracellular staining, cell suspensions were stained with the Zombie NIR fixable viability dye (Biolegend) according to  
564 manufacturer's instructions and incubated for 20 minutes at 4 °C. The cells were washed in PBS/3% FCS, centrifuged (400 x  
565 g, 6 min) and resuspended in PBS/3% FCS containing antibodies for surface staining as described above. The cells were stained  
566 for 45 minutes at 4°C in the dark, then washed in PBS/3% FCS, centrifuged (400 x g, 6 min) and the cell pellets were  
567 resuspended in 1X fixation buffer (TF staining kit, eBioscience) overnight at 4°C in the dark. Fixed cells were centrifuged at  
568 400 x g for 6 minutes and the pellet resuspended in 1 x permeabilisation buffer (TF staining kit, eBioscience). The cells were  
569 centrifuged (400 x g, 6 min) and then resuspended in 1 x permeabilisation buffer containing the antibodies for intranuclear  
570 staining: Foxp3 (FJK-16s) and RORγt (B2D) from eBioscience. The cells were stained at room temperature for 1h, then washed  
571 in PBS/3% FCS, centrifuged (400 x g, 6 min) and finally resuspended in PBS/3% FCS for flow cytometry.

572 The cells were acquired on a BD LSRFortessa flow cytometer (BD) and analysed using the FlowJo analysis software (BD).

573

#### 574 High-throughput 16S rRNA gene amplicon analysis

575 Samples were processed and analysed as described previously.<sup>58</sup> In brief, metagenomic DNA was purified on columns  
576 (Macherey-Nagel) after mechanical lysis by bead-beating. The V3-V4 regions of 16S rRNA genes were amplified (25 cycles),  
577 purified using AMPure XP magnetic beads (Beckman-Coulter, Germany) and sequenced in paired-end mode using the v3  
578 chemistry (600 cycles) on an Illumina MiSeq according to the manufacturer's instructions. The platform was semi-automated  
579 (Biomek4000 pipetting robot, Beckman Coulter, Germany) to increase reproducibility and the workflow systematically  
580 included two negative controls (a DNA-extraction control, *i.e.*, sample-free DNA-stabilization solution, and a PCR blank, *i.e.*,  
581 PCR-grade water as template) for each 46 samples sequenced. Raw sequencing reads were processed using IMNGS  
582 ([www.imngs.org](http://www.imngs.org)),<sup>21</sup> a platform based on UPARSE.<sup>73</sup> A sequence identity threshold of 97% was used for clustering sequences  
583 into operational taxonomic units (OTUs). Unless otherwise stated, only OTUs that occurred at a relative abundance ≥0.25%  
584 in at least one sample were kept for further processing.<sup>74</sup> OTUs were taxonomically classified using SILVA (Pruesse et al.,  
585 2012). Further data processing (diversity and composition analyses) was done in R using Rhea.<sup>12</sup>

586 To determine cultured fractions, the 16S rRNA gene sequences of isolates were matched to OTUs using blastn (E-value  
587 <1e-25, 97% identity, 80% query coverage). Large-scale ecological analysis of the mouse gut was conducted using 11,485  
588 datasets downloaded from the IMNGS database.<sup>21</sup> 16S rRNA amplicon samples containing ≥5000 sequences and labelled as  
589 'mouse gut' (n = 11,485) were used. The 16S rRNA gene sequences of all isolates were compared to IMNGS-derived OTU  
590 sequences using blastn (E-value <1e-25, 97% identity, 80% query coverage).

591

#### 592 16S rRNA-gene targeted quantitative PCR (qPCR)

593 16S rRNA gene-targeted primers and probes for the nine new strains within OMM19.1 were designed as described before,<sup>31</sup>  
594 except those for *Mucispirillum schaedleri*, *Escherichia coli*, and *Extibacter muris*, which were published elsewhere.<sup>20,34,37</sup>  
595 Sequences were: *Adlercreutzia mucosicola*, f-5'GCTTCGGCCGGGAAT, r-5'GGCAGGTTGGTCACGTGTTA, Hex-  
596 CAGTGCGCAACGGGTGA-BHQ1; *Clostridium ramosum*, f-5'GCGAACGGGTGAGTAATACATAAGT, r-  
597 5'GCGGTTCTTAGCTATCGTTTCCA, Fam-ACCTGCCCTAGACAGG-BHQ1; *Xylanibacter rodentium*, f-5'AAGCGTGCCGTGAAATGTC, r-  
598 5'CGCACTCAAGGACTCCAGTTC, Hex-CTCAACCTTGACACTGC-BHQ1; *Parabacteroides goldsteinii*, f-  
599 5'CGCGTATGCAACCTACCTATCA, r-5'ACCCTGTTTTATGCGGTATTAGTC, Fam-AATAACCCGGCGCAAAGT-BHQ1; *Flintibacter*  
600 *butyricus*, f-5'TAGCGGGAAAGCAAGTCA, r-5'CAAATGCAGGCCACAGGTT, Fam-ATGTGAAAACCATGGGC-BHQ1;

601 *Ligilactobacillus murinus*, f-5'TCGGATCGTAAAACCCTGTTG, r-5'ACCGTCGAAACGTGAACAGTT; Hex-  
602 TAGAGAAGAAAGTGCCTGAGAG-BHQ1. For absolute quantification of 16S rRNA copy numbers, standard curves using 10-fold  
603 dilution series (1-10<sup>6</sup> copies/μl) of linearized plasmids containing the target sequence were generated using 6 replicates. qPCR  
604 assays and specificity testing were performed as described previously (Brugiroux et al, 2016).

605

#### 606 **Shotgun metagenome analysis**

607 For comparison to the metagenomic gene catalogue, the protein sequences from the genome of each isolate were extracted  
608 using Prodigal (v2.6.3) using default options. These sequences were then annotated against the protein sequences within  
609 iMGMC<sup>23</sup> using DIAMOND blastp (v2.0.8.146),<sup>75</sup> with a minimal bit-score of 100.

610 For the prediction of synthetic communities using MiMiC,<sup>28</sup> host reads were removed from the metagenomic samples using  
611 BBmap based on the methods defined in the iMGMC pipeline.<sup>23</sup> The filtered metagenomic reads were assembled using  
612 Megahit (v1.2.9) with default options.<sup>76</sup> Protein sequences were then extracted from each assembly using Prodigal (v2.6.3),  
613 with the '-p meta' flag.<sup>77</sup> Proteins were then annotated against the Pfam database (v32)<sup>78</sup> using HMMScan,<sup>79</sup> filtered using  
614 the gathering threshold option (--cut\_ga). For each sample, the annotation was converted into a binary presence/absence  
615 vector file. The genome of each isolate was also annotated against the Pfam database and used to generate a binary  
616 presence/absence vector file for comparison against the metagenomic samples. MiMiC scoring was modified to include  
617 weighting (score modifier = 0.0005) for each Pfam present in >50% of samples within a group. Secondly, weighting (score  
618 modifier = 0.0012) was applied to Pfams that occurred significantly more frequently (Fischer exact, p-value < 0.05) within  
619 either of the groups. An initial round of sample-wise consortia selection was conducted for each group of mice (sensitive vs.  
620 resistant to DSS-induced colitis). The isolates selected within at least three samples within a group were included in a reduced  
621 list of isolates used for a second group-wise selection. In this second level of selection, each group-specific reduced list of  
622 isolates was used to generate a list of all potential 12-member consortia. For each group, the vector of each consortium was  
623 compared to the vectors of all individual samples, each providing a MiMiC score as described above. The consortium with the  
624 highest consortia-wide MiMiC score across each group of samples was selected as being most representative of that group.

625

#### 626 **Taxonomic description of novel bacteria**

627 The general scheme followed here to describe novel taxa was as described in our recent work.<sup>58</sup> In brief, draft genomes were  
628 generated for the strains supposed to represent novel taxa due to a 16S rRNA gene sequence identity <98.7% to any bacteria  
629 with a valid name.<sup>61,80</sup> This was followed by taxonomic, ecological, and functional analyses using Protologger  
630 ([www.protologger.de](http://www.protologger.de)).<sup>24</sup> All raw output files of these analyses are available in the project data repository:  
631 <https://github.com/ClavellLab/miBC>. For each isolate, taxonomy was assigned using the following thresholds: <98.7% (as  
632 indication for a novel species), <94.5% (novel genus), and <86.5% (novel family) based on 16S rRNA gene sequence  
633 similarities;<sup>81</sup> ANI values <95% and genome-based differences in G+C content of DNA >1%<sup>82</sup> to separate species; POCP values  
634 <50% for distinct genera.<sup>83</sup> Phylogenomic trees were also considered to make decisions on genus- and family-level  
635 delineation. Manual POCP analysis, Genome-to-Genome Distance Calculator 3.0<sup>84</sup> with a cut-off of 70% for species level, and  
636 ANI Calculator<sup>61</sup> were also performed for the delineation of certain species. Scanning electron micrographs of all the isolates  
637 representing novel taxa are available online (<https://github.com/ClavellLab/miBC>). In addition to the 36 novel taxa described  
638 here in the expanded version of miBC, the protologues below also include the description of three isolates from the original  
639 collection,<sup>12</sup> for which genomes have now been generated, revealing their status of novel species.

640 **Description of *Acetatifactor aquisgranensis* sp. nov.** *Acetatifactor aquisgranensis* (a.quis.gra.nen'sis. M.L. masc. adj.  
641 *aquisgranensis*, pertaining to Aachen (Germany), where the bacterium was isolated). The isolate has the highest 16S rRNA  
642 gene sequence similarity to *Acetatifactor muris* (89.17%). Despite this relatively low value that may indicate a novel genus,  
643 GTDB-Tk classified the genome as an unknown species within the genus *Acetatifactor*. The closest relative based on genome  
644 tree is *A. muris*, which shares a POCP value of 59.45%, above the genus delineation threshold. As the ANI and GGDC value of  
645 the isolate to *A. muris* are 81.00% and 29.10%, respectively, the isolate is proposed to represent a novel species within the  
646 genus *Acetatifactor*. Cells are generally straight to slightly bent rods (1-2μm in length) when grown in BHI medium for 3-7  
647 days at 37°C under anaerobic conditions. In total, 404 CAZymes were identified within the genome. The ability to utilise starch  
648 and cellulose as carbon source was predicted. KEGG analysis identified pathways for the production of acetate from acetyl-  
649 CoA (EC:2.3.1.8, 2.7.2.1), propionate from propanoyl-CoA (EC:2.3.1.8, 2.7.2.1), L-cysteine and acetate from sulfide and L-  
650 serine (EC:2.3.1.30, 2.5.1.47), L-glutamate from ammonia via L-glutamine (EC:6.3.1.2, 1.4.1.-), and folate (vitamin B9) from  
651 7,8-dihydrofolate (EC:1.5.1.3). No antibiotic resistance genes were identified. The 16S rRNA gene sequence of the species  
652 was most prevalent in the mouse gut (47.6% of 1,000 samples positive, at an average relative abundance of 0.23%), followed  
653 by human vagina (1.9%). The type strain is **CLA-AA-M01 (=DSM110981<sup>T</sup>)**. Its G+C content of genomic DNA is 51.2 mol%. It  
654 was isolated from the caecal content of an SPF mouse.

655 **Description of *Adlercreutzia agrestimuris* sp. nov.** *Adlercreutzia agrestimuris* (a.gres.ti.mu'ris. L. masc. adj. *agrestis*, wild; L.  
656 masc. or fem. n. *mus*, a mouse; N.L. gen. n. *agrestimuris*, of a wild mouse). The next relatives based on 16S rRNA gene  
657 sequence analysis was *Enteroscipio rubneri* (92.10% identity), followed by members of the genus *Adlercreutzia*. GTDB-Tk  
658 assigned the genome to an unknown genus within family *Eggerthellaceae*. Phylogenomic analysis confirmed that this isolate

659 belongs to family *Eggerthellaceae*, forming a separate branch within a cluster of species from the genus *Adlercreutzia*. POCP  
660 values >50% were observed for multiple genera within family *Eggerthellaceae*: *Senegalimassilia anaerobia* (family  
661 *Coriobacteriaceae* in LPSN), 58.5%; *Adlercreutzia caecimuris*, 58.4%; *Eggerthella lenta*, 54.3%; *E. rubneri*, 58.1%; *Slackia*  
662 *piriformis*, 57.0%; *Berryella intestinalis*, 55.8%. However, the highest POCP value was 61.7% to *Adlercreutzia equolifaciens*,  
663 the type species of this genus. The isolate also shared POCP values >50% to other strains from this study proposed to  
664 represent additional novel *Adlercreutzia* species: *Adlercreutzia murintestinalis* (58.7%) and *Adlercreutzia aquisgranensis*  
665 (64.0%). None of the close species with a valid name and these other isolates shared ANI and GGDC values above the  
666 corresponding species delineation thresholds. Altogether, with the current state of isolates and genomes available from  
667 members of the family *Eggerthellaceae*, the taxonomic placement of novel taxa is ambiguous due to conflicting data. Despite  
668 relatively low 16S rRNA gene sequence identities and the GTDB-Tk assignment of this isolate, we propose to create a novel  
669 species within the genus *Adlercreutzia*, and not a novel genus, to avoid generating more confusion. This decision was primarily  
670 based on highest POCP value to *Adlercreutzia equolifaciens* (the type species of this genus) and phylogenomic placement of  
671 the isolate. The taxonomy of genera and species within family *Eggerthellaceae* will have to be consolidated in the near future  
672 when a higher number of isolates and genomes are available. Cells are short rods (ca. 0.6-1.2 µm in length) when grown in  
673 WCA medium under anaerobic conditions for up to 5 days. In total, 75 CAZymes were identified within the genome. No genes  
674 for carbon source utilisation were found. KEGG analysis identified pathways for the production of acetate from acetyl-CoA  
675 (EC:2.3.1.8, 2.7.2.1), propionate from propanoyl-CoA (EC:2.3.1.8, 2.7.2.1), L-cysteine and acetate from sulfide and L-serine  
676 (EC:2.3.1.30, 2.5.1.47), and L-glutamate from ammonia via L-glutamine (EC:6.3.1.2, 1.4.1.-). No antibiotic resistance genes  
677 were detected. The 16S rRNA gene sequence of the species was most prevalent in the mouse gut (7.1% of 1,000 samples  
678 positive) at low relative abundance. The type strain is **CLA-SR-6<sup>T</sup> (=DSM 109821<sup>T</sup>)**. Its G+C content of genomic DNA is 48.2%.  
679 It was isolated from the gut content of a wild mouse.

680 **Description of *Adlercreutzia aquisgranensis* sp. nov.** *Adlercreutzia aquisgranensis* (a.quis.gra.nen'sis. M.L. fem. adj.  
681 *aquisgranensis*, pertaining to Aachen (Germany), where the bacterium was isolated). Based on 16S rRNA gene sequence  
682 comparisons, the isolate was most closely related to *Adlercreutzia muris* (94.82%). However, GTDB-Tk assigned the genome  
683 to an unknown genus within family *Eggerthellaceae*. Phylogenomic analysis confirmed that this isolate belongs to family  
684 *Eggerthellaceae*, as it forms a separate branch within a cluster of species from the genus *Adlercreutzia*. The isolate shares  
685 POCP value >50% to species from multiple genera within family *Eggerthellaceae*, albeit with highest value of 60.5% to  
686 *Adlercreutzia caecicola* and 59.5% to *Adlercreutzia equolifaciens*, the type species of this genus. The isolate also shared POCP  
687 values >50% to other strains from this study proposed to represent additional *Adlercreutzia* novel species: *Adlercreutzia*  
688 *murintestinalis* (53.6%) and *Adlercreutzia agrestimuris* (64.0%). Based on (i) the 16S rRNA genes sequence identity above the  
689 genus delineation threshold (94.5%), (ii) high POCP values to several *Adlercreutzia* spp., and (iii) phylogenomic analysis, we  
690 think it is sound to place this isolate within the genus *Adlercreutzia*. None of the close species with a valid name and the other  
691 isolates aforementioned shared ANI and GGDC values above the corresponding species delineation thresholds, confirming  
692 the status of novel species. Cells are rods (0.6-1.2 µm in length) when grown in WCA medium under anaerobic conditions for  
693 up to 5 days. In total, 73 CAZymes were identified within the genome. No genes for carbon source utilisation were found.  
694 KEGG analysis identified pathways for the production of acetate from acetyl-CoA (EC:2.3.1.8, 2.7.2.1), propionate from  
695 propanoyl-CoA (EC:2.3.1.8, 2.7.2.1), and L-glutamate from ammonia via L-glutamine (EC:6.3.1.2, 1.4.1.-). No antibiotic  
696 resistance genes were detected. The 16S rRNA gene sequence of the species was most prevalent in the mouse gut (14.5% of  
697 1,000 samples positive) at low relative abundance. The type strain is **CLA-RA-2<sup>T</sup> (=DSM 108611<sup>T</sup>)**. Its G+C content of genomic  
698 DNA is 64.4%. It was isolated from the gut content of a wild mouse.

699 **Description of *Adlercreutzia murintestinalis* sp. nov.** *Adlercreutzia murintestinalis* (mur.in.tes.ti.na'lis. L. masc. or fem. n. *mus*,  
700 a mouse; N.L. masc. adj. *intestinalis*, intestinal; N.L. fem. adj. *murintestinalis*, of the mouse intestine). The closest relatives  
701 based on 16S rRNA gene sequence similarities are *Adlercreutzia equolifaciens* subsp. *equolifaciens* (92.21%), followed by  
702 *Adlercreutzia equolifaciens* subsp. *celatus* (91.64%), and *Adlercreutzia caecicola* (91.30%). GTDB-Tk assigned the isolate to an  
703 unknown genus within family *Eggerthellaceae*. Phylogenomic analysis confirmed that this isolate belongs to family  
704 *Eggerthellaceae*, forming a separate branch within a cluster of species from the genus *Adlercreutzia*. POCP values above the  
705 genus delineation threshold (50%) were obtained against members of multiple genera within family *Eggerthellaceae*,  
706 including: *Adlercreutzia* (*A. equolifaciens*, 54.12% (highest); *Adlercreutzia caecimuris*, 51.74%; *Adlercreutzia mucosicola*,  
707 53.27%), *Gordonibacter* (*Gordonibacter urolithinifaciens*, 51.99%), and *Senegalimassilia* (*Senegalimassilia anaerobia*, family  
708 *Coriobacteriaceae* in LPSN, 50.31%). The isolate also shared POCP values >50% to other strains from this study proposed to  
709 represent additional novel *Adlercreutzia* species: *Adlercreutzia agrestimuris* (58.7%) and *Adlercreutzia aquisgranensis*  
710 (53.6%). However, none of the close species with a valid name and these other isolates shared ANI and GGDC values above  
711 the respective species delineation thresholds. Altogether, with the current state of isolates and genomes available from  
712 members of the family *Eggerthellaceae*, the taxonomic placement of novel taxa is ambiguous due to conflicting data. Despite  
713 relatively low 16S rRNA gene sequence identities and the GTDB-Tk assignment of this isolate, we propose to create a novel  
714 species within the genus *Adlercreutzia*, and not a novel genus, to avoid generating more confusion. This decision was primarily  
715 based on highest POCP value to *Adlercreutzia equolifaciens* (the type species of this genus) and phylogenomic placement of  
716 the isolate. The taxonomy of genera and species within family *Eggerthellaceae* will have to be consolidated in the future  
717 when a higher number of isolates and genomes are available. The genome contained only 80 CAZymes and no carbohydrate  
718 utilisation pathways were identified. KEGG analysis identified pathways for acetate production from acetyl-CoA (EC:2.3.1.8,  
719 2.7.2.1) and propionate production from propanoyl-CoA (EC:2.3.1.8, 2.7.2.1). Ecological analysis suggested that the species  
720 is most prevalent within amplicon datasets from the mouse gut (5.6%). The type strain is **CLA-AA-M17<sup>T</sup> (=DSM 112345<sup>T</sup>)**. Its  
721 G+C content of genomic DNA is 59.3 mol%. It was isolated from the gut content of an SPF mouse.

722 **Description of *Alistipes muris* sp. nov.** *Alistipes muris* (mu'ris L. gen. n. *muris* of a mouse). This isolate showed highest 16S  
723 rRNA gene sequence similarities to species within the genus *Alistipes* (*Alistipes dispar*, 95.79%; *Alistipes timonensis*, 95.59%;  
724 *Alistipes putredinis*, 95.30%). GTDB-Tk identified the genome as species "Alistipes sp002428825". The genus assignment was  
725 supported by POCP analysis (60.22% to *A. timonensis*) and by the placement of the isolate amongst *Alistipes* species in the  
726 genomic tree, including the type species of this genus, *A. putredinis*. None of the closest relatives shared an ANI value above  
727 95% with the genome of this isolate, confirming its status as a novel species. Cells were rods, mostly 1.0-2.5 µm in length  
728 when grown on YCFA Agar for 3-10 days at 37°C under anaerobic conditions. The total number of CAZyme identified in the  
729 genome was 140. No genes related to carbon source utilisation were found. KEGG analysis identified pathways for the  
730 production of acetate from acetyl-CoA (EC:2.3.1.8, 2.7.2.1), propionate from propanoyl-CoA (EC:2.3.1.8, 2.7.2.1), and L-  
731 glutamate from ammonia via L-glutamine (EC:6.3.1.2, 1.4.1.-). The detection of major facilitator superfamily (MFS) antibiotic  
732 efflux pump (ARO:0010002) may indicate resistance to antibiotics. The 16S rRNA gene sequence of the species was most  
733 prevalent in the mouse gut (51.1% of 1,000 samples positive, at an average relative abundance of 1.98%), followed by pig  
734 (3.6%) and human gut (3.0%). The type strain is **CLA-AA-M12 (=DSM112343<sup>T</sup>)**. Its G+C content of genomic DNA is 59.2 mol%.  
735 It was isolated from filtered (0.45 µm) gut content of an SPF, Fsp27<sup>-/-</sup> mouse.

736 **Description of *Anaerocaecibacter* gen. nov.** *Anaerocaecibacter* (An.ae.ro.cae'ci.bac.ter. Gr. pref. *an-*, not; Gr. masc. n. *aer*,  
737 air; L. neut. n. *caecum*, caecum; N.L. masc. n. *bacter*, rod; N.L. masc. n. *Anaerocaecibacter*, an anaerobic rod from caecum).  
738 The closest relatives based on 16S rRNA gene similarity are *Xylanivirga thermophila* (83.57%), *Christensenella hongkongensis*  
739 (83.57%), *Caldicoprobacter guelmensis* (83.41%), and *Caldicoprobacter faecalis* (83.29%). POCP values to all close relatives  
740 were below 30% and GTDB-Tk placement assigned the type species to an unknown genus within 'f\_CAG-552'. Separation  
741 from the other proposed species *Pumilibacter muris* and *Pumilibacter intestinalis* within the propose novel family  
742 *Pumilibacteraceae* (see protologue below) was confirmed by phylogenomic placement, which showed they were distinct from  
743 each other, and by the POCP value of 45.9% between the type species of each genus. The type species is *Anaerocaecibacter*  
744 *muris*.

745 **Description of *Anaerocaecibacter muris* sp. nov.** *Anaerocaecibacter muris* (mu'ris L. gen. n. *muris* of a mouse). Cells are rods  
746 (length: 1.2-2.7 µm, diameter ca. 0.5µm) when grown on YCFA or mGAM Blood agar under anaerobic conditions for 2-4  
747 weeks. In total, 93 CAZymes were identified within the genome of the type strain and only starch was predicted to be utilised  
748 as a carbon source. KEGG analysis identified pathways for the production of acetate from acetyl-CoA (EC:2.3.1.8, 2.7.2.1),  
749 propionate from propanoyl-CoA (EC:2.3.1.8, 2.7.2.1), L-cysteine and acetate from sulfide and L-serine (EC:2.3.1.30, 2.5.1.47)  
750 and L-glutamate from ammonia via L-glutamine (EC:6.3.1.2, 1.4.1.-). Antibiotic resistance was predicted based on the  
751 detection of tetracycline-resistant ribosomal protection protein. Ecological analysis suggested that the species is most  
752 prevalent within amplicon datasets from the mouse gut (16.3%). The type strain is **CLA-AA-M11<sup>T</sup>**. Its G+C content of genomic  
753 DNA is 50.3 mol%. It was isolated from a filtered (0.45 µm) faecal suspension of an SPF, Fsp27<sup>-/-</sup> mouse.

754 **Description of *Anaerotardibacter* gen. nov.** *Anaerotardibacter* (An.ae.ro.tar.di.bac'ter. Gr. pref. *an-*, not; Gr. masc. n. *aer*,  
755 air; L. masc. adj. *tardus*, slow; N.L. masc. n. *bacter*, a rod; N.L. masc. n. *Anaerotardibacter*, slow growing anaerobic rod,  
756 pertaining to the slow growing nature of the bacterium). The isolate shares highest 16S rRNA gene sequence similarity to  
757 *Eggerthella sinensis* (89.61%). GTDB-Tk assigned the genome to an unknown genus 'CAG-1427' within the family  
758 *Eggerthellaceae*. The phylogenomic tree analysis placed the isolate within the cluster containing multiple genera from the  
759 *Eggerthellaceae*, with the closest relative being *Denitrobacterium detoxificans*. However, the POCP value to this species was  
760 47.6%, while the highest value was to *Senegalimassilia anaerobia* (50.3%). These analyses support the creation of a novel  
761 genus to accommodate this isolate. The type species is *Anaerotardibacter muris*.

762 **Description of *Anaerotardibacter muris* sp. nov.** *Anaerotardibacter muris* (mu'ris L. gen. n. *muris* of a mouse). The species  
763 shares all features of the genus. Cells are short rods (0.6-1.2 µm in length) when grown on YCFA or mGAM Blood (5%) agar  
764 under anaerobic conditions for 1-3 weeks, as the bacterium is a slow grower. Very low DNA amount could be extracted when  
765 no enzymatic lysis was added during extraction. The total number of CAZymes identified in the genome was 73. No genes for  
766 carbon source utilisation were predicted. KEGG analysis identified pathways for the production of acetate from acetyl-CoA  
767 (EC:2.3.1.8, 2.7.2.1) and propionate from propanoyl-CoA (EC:2.3.1.8, 2.7.2.1). No antibiotic resistance genes were detected.  
768 Ecological analysis suggested that the species is most prevalent within amplicon datasets from the human gut (17.3% of 1,000  
769 samples positive), followed by wastewater (14.5%), and mouse gut (7.1%). The type strain is **CLA-AA-M13<sup>T</sup>**. Its G+C content  
770 of genomic DNA is 54.2 mol% It was isolated from the gut content of an SPF, Fsp27<sup>-/-</sup> mouse.

771 **Description of *Bacteroides muris* sp. nov.** *Bacteroides muris* (mu'ris L. gen. n. *muris* of a mouse). According to 16S rRNA gene  
772 sequence analysis, this bacterium was most closely related to *Bacteroides* spp. (max. 96.69% to *Bacteroides uniformis*). GTDB-  
773 Tk identified the genome as 'Bacteroides sp002491635'. Assignment to the genus *Bacteroides* was also supported by POCP  
774 analysis, with highest value of 67.38% to *B. uniformis*, and 54.0% to *B. fragilis* (type species). In the genome tree, the isolate  
775 formed a cluster with *B. uniformis* and *B. rodentium*. However, the corresponding ANI and GDGC values were below the  
776 species delineation thresholds (92.08%/48.20% and 90.92%/43.10%, respectively), justifying the proposal to create a novel  
777 species within the genus *Bacteroides*. The bacterium grows well on Columbia blood agar (5% sheep blood) within 24 hours at  
778 37°C under aerobic conditions. The total number of CAZymes identified within the genome was 410. The ability to utilise  
779 starch and cellulose as carbon source was identified. KEGG analysis revealed pathways for the production of acetate from  
780 acetyl-CoA (EC:2.3.1.8, 2.7.2.1), propionate from propanoyl-CoA (EC:2.3.1.8, 2.7.2.1), L-cysteine and acetate from sulfide and  
781 L-serine (EC:2.3.1.30, 2.5.1.47), L-glutamate from ammonia via L-glutamine (EC:6.3.1.2, 1.4.1.-), folate (vitamin B9) from 7,8-  
782 dihydrofolate (EC:1.5.1.3), and riboflavin (vitamin B2) from GTP (EC:3.5.4.25, 3.5.4.26, 1.1.1.193, 3.1.3.104, 4.1.99.12,



783 2.5.1.78, 2.5.1.9, 2.7.1.26, 2.7.7.2). The isolate may be resistant to antibiotics due to the detection of CblA beta-lactamase  
784 (ARO:3002998). The 16S rRNA gene sequence of the species was most prevalent in the mouse gut (39.3% of 1,000 samples  
785 positive, at an average relative abundance of 1.51%), followed by wastewater (10.9%), and human gut (10.2%). The type  
786 strain is **NM69\_E16B (=DSM110164<sup>T</sup>)**. Its G+C content of genomic DNA is 46.0 mol%. It was isolated from the caecal/colon  
787 content of an APC<sup>min/+</sup> Msh2<sup>-/-</sup> mouse.

788 **Description of *Clostridium mucosae* sp. nov.** *Clostridium mucosae* (mu.co'sae. N.L. gen. n. mucosae, of mucosa). The isolate  
789 shared the highest 16S rRNA gene sequence similarity with *Clostridium tertium* (99.22%), followed by *Clostridium*  
790 *sartagoforme* (98.17%). GTDB-Tk assigned the genome to a novel species within the genus *Clostridium*. This assignment was  
791 supported by the POCP value of 78.78% to *C. tertium* and 50.2% to *Clostridium butyricum*, the type species of this genus, and  
792 by the genome tree. The ANI and GGDC values between the genomes of the isolate and *C. tertium* or *C. sartagoforme* were  
793 below species delineation (91.01%/42.60% and 84.26%/28.40%, respectively), confirming that this isolate represents a novel  
794 species. The number of CAZymes identified within the genome was 307. Genome analysis predicted the ability to utilise  
795 glucose, arbutin, salicin, cellobiose, sucrose, trehalose, maltose, starch, and cellulose as carbon source. KEGG analysis  
796 identified pathways for the production of acetate from acetyl-CoA (EC:2.3.1.8, 2.7.2.1), propionate from propanoyl-CoA  
797 (EC:2.3.1.8, 2.7.2.1), L-cysteine and acetate from sulfide and L-serine (EC:2.3.1.30, 2.5.1.47), L-glutamate from ammonia via  
798 L-glutamine (EC:6.3.1.2, 1.4.1.-), folate (vitamin B9) from 7,8-dihydrofolate (EC:1.5.1.3), and riboflavin (vitamin B2) from GTP  
799 (EC:3.5.4.25, 3.5.4.26, 1.1.1.193, 3.1.3.104, 4.1.99.12, 2.5.1.78, 2.5.1.9, 2.7.1.26, 2.7.7.2). No antibiotic resistance genes were  
800 detected. The 16S rRNA gene sequence of the species was most prevalent in pig gut microbiota (60.4% of 1,000 samples  
801 positive), followed by activated sludge (52.6%), and human gut microbiota (48.5%). The type strain is **PG-426-IM-1<sup>T</sup>**  
802 **(=DSM100503<sup>T</sup>)**. Its G+C content of genomic DNA is 27.7 mol%. It was isolated from the ileal mucosa of a TNF<sup>deltaARE/+</sup> mouse.<sup>12</sup>

803 **Description of *Caniella* gen. nov.** *Caniella* (Ca.ni.el'la. N.L. fem. n. *Caniella*, in honour of Prof. Dr. Patrice Cani, UCLouvain,  
804 Brussels, Belgium, for his contribution to the field of microbe-host interactions in metabolic diseases). The closest relatives  
805 based on 16S rRNA gene sequence identity are species within genus *Olsenella* (max. 94.36% to *Olsenella phocaeensis*). GTDB-  
806 Tk assigned the genomes to an unknown genus within family *Atopobiaceae*. The highest POCP value was to *Olsenella*  
807 *scatoligenes* (50.0-52.4%), whilst the values to *Olsenella uli* (type species of *Olsenella*) and to *Atopobium minutum* (type  
808 species of *Atopobium*) were 48.6-52.1% and 45.3-48.4%, respectively. Phylogenomic analysis confirmed that the isolates fall  
809 within the family *Atopobiaceae*, separated from members of the genera *Olsenella* and *Atopobium*. Together, these analyses  
810 support the novel genus classification of the isolates. The type species is *Caniella muris*.

811 **Description of *Caniella muris* sp. nov.** *Caniella muris* (mu'ris L. gen. n. *muris* of a mouse). The species has all features of the  
812 genus. Cells usually grow as coccobacilli to short rods with slightly pointy ends (0.8-2.0 µm in length) in WCA medium under  
813 anaerobic conditions for 2-3 days. In total, 99-118 CAZymes were identified within the genome of strains within this species.  
814 Genome analysis predicted the ability to utilise arbutin, salicin, cellobiose, maltose, and starch. KEGG analysis identified the  
815 pathways for production of acetate from acetyl-CoA (EC:2.3.1.8, 2.7.2.1), propionate from propanoyl-CoA (EC:2.3.1.8,  
816 2.7.2.1), L-cysteine and acetate from sulfide and L-serine (EC:2.3.1.30, 2.5.1.47), L-glutamate from ammonia via L-glutamine  
817 (EC:6.3.1.2, 1.4.1.-), and folate from 7,8-dihydrofolate (EC:1.5.1.3). No antibiotic resistance genes were detected. Ecological  
818 analysis suggests that the species is most prevalent within amplicon datasets from the mouse gut (ca. 17% of 1,000 samples  
819 positive). The range of G+C content of genomic DNA of strains within the species is 69.0-70.0 mol%. The type strain, **CLA-SR-**  
820 **94<sup>T</sup> (=DSM 110323<sup>T</sup>)**, was isolated from the caecal content of a wild mouse. Strain NM08\_P-01 (=DSM 110563) was isolated  
821 from the caecal/colon content of an APC<sup>min/+</sup> Msh2<sup>-/-</sup> mouse. Strain CLA-SR-156 (=DSM 110983) and WCA-FA-Sto1.30.01  
822 (=DSM 105314) were isolated in Aachen, Germany, from the caecal content of a conventional laboratory mouse and stomach  
823 content of a wild mouse, respectively.

824 **Description of *Dubosiella muris* sp. nov.** *Dubosiella muris* (mu'ris L. gen. n. *muris* of a mouse). The closest relative to this  
825 isolate based on 16S rRNA gene sequence similarity is *Dubosiella newyorkensis* (91.10%), the type species of this genus.  
826 Despite this relatively low value that may indicate a novel genus, GTDB-Tk assigned the genome as a novel species within the  
827 genus *Dubosiella*. Both POCP and genome tree analysis further supported this genus classification, with a placement next to  
828 the aforementioned species and a corresponding POCP value of 73.82%, well above the genus delineation cut-off point of  
829 50%. The ANI (77.66%) and GGDC (18.40%) values to the genome of *D. newyorkensis* confirmed that the isolate represents a  
830 novel species. The isolate grows in Phenylethyl Alcohol Medium under anaerobic conditions within 3 days. In total, 168  
831 CAZymes were identified within the genome. The ability to utilise cellobiose and starch as carbon sources was predicted.  
832 KEGG analysis identified pathways for acetate production from acetyl-CoA (EC:2.3.1.8, 2.7.2.1), propionate from propanoyl-  
833 CoA (EC:2.3.1.8, 2.7.2.1), L-cysteine and acetate from sulfide and L-serine (EC:2.3.1.30, 2.5.1.47), and L-glutamate from  
834 ammonia via L-glutamine (EC:6.3.1.2, 1.4.1.-). The presence of the genes for tetracycline-resistant ribosomal protection  
835 protein (ARO:0000002) may indicate antibiotic resistance. The 16S rRNA gene sequence of the species was most prevalent in  
836 the mouse gut (14.8% of 1,000 samples positive, at an average relative abundance of 2.62%), followed by pig gut (2.5%), and  
837 human skin (1.7%). The type strain is **NM09\_H32<sup>T</sup> (=DSM 110160<sup>T</sup>)**. Its G+C content of genomic DNA is 50.6 mol%. It was  
838 isolated from the caecal/colon content of an APC<sup>min/+</sup> Msh2<sup>-/-</sup> mouse.

839 **Description of *Flintibacter muris* sp. nov.** *Flintibacter muris* (mu'ris L. gen. n. *muris* of a mouse). This bacterium shares highest  
840 16S rRNA gene sequence identity to *Flintibacter butyricus* (97.32%), the type species of the genus *Flintibacter*. GTDB-Tk  
841 identified the genome as an unknown species within the genus *Lawsonibacter*. However, *Flintibacter* spp. are classified under  
842 the genus *Lawsonibacter* in GTDB, although this genus was validly published later.<sup>85</sup> The highest POCP value (69.42%) is to *F.*  
843 *butyricus* and only 46.58% to *Lawsonibacter asaccharolyticus* (the type species of this genus). The genome tree analysis also

844 identified *F. butyricus* as the closest relative. However, the ANI and GGDC value of 84.8% and 30.1%, respectively, between  
845 the latter species and the isolate confirmed its status of a novel species. The type strain forms rods when grown on BHI  
846 Medium under anaerobic conditions for 2 days. The total number of CAZymes identified in the genome was 165. The ability  
847 to utilise glucose and starch as carbon source was predicted. KEGG analysis identified pathways for acetate production from  
848 acetyl-CoA (EC:2.3.1.8, 2.7.2.1), propionate from propanoyl-CoA (EC:2.3.1.8, 2.7.2.1), L-cysteine and acetate from sulfide and  
849 L-serine (EC:2.3.1.30, 2.5.1.47), L-glutamate from ammonia via L-glutamine (EC:6.3.1.2, 1.4.1.-), and folate (vitamin B9) from  
850 7,8-dihydrofolate (EC:1.5.1.3). As butyrate biosynthesis was not predicted, manual examination of the Prokka annotation  
851 identified genes assigned as 3-hydroxybutyryl-CoA dehydrogenase (EC 1.1.1.157), butyryl-CoA:acetate CoA-transferase (EC  
852 2.8.3.-), 3-aminobutyryl-CoA aminotransferase (EC 2.6.1.111), and putative butyrate kinase 2 (EC 2.7.2.7). The presence of  
853 genes for tetracycline-resistant ribosomal protection protein (ARO:0000002) indicates antibiotic resistance. The 16S rRNA  
854 gene sequence of the species was most prevalent in the mouse gut (74.7% of 1,000 samples positive, at an average relative  
855 abundance of 0.98%), followed by chicken gut (71.5%), and pig gut (52.9%). The type strain is **CLA-AV-17<sup>T</sup> (=DSM 110149<sup>T</sup>)**.  
856 Its G+C content of genomic DNA is 55.8 mol%. It was isolated from the caecal content of an SPF mouse.

857 **Description of *Hominisplanchenecus murintestinalis* sp. nov.** *Hominisplanchenecus murintestinalis* (mur.in.tes.ti.na'lis. L.  
858 mas. or fem. n. *mus*, a mouse; N.L. masc. adj. *intestinalis*, intestinal; N.L. masc. adj. *murintestinalis*, of the mouse intestine).  
859 Strains CLA-AA-M05 and NM72\_1-8 show highest 16S rRNA gene sequence identities to *Murimonas intestini* (91.57-91.13%),  
860 followed by *Marvinbryantia formatexigens* (91.39-91.47%). Phylogenomic analysis placed the genome of the isolates amongst  
861 members of multiple genera within family *Lachnospiraceae*. GTDB-Tk assigned the isolates to the genus 'CAG-56' (family  
862 *Lachnospiraceae*), the same genus as the recently described species *Hominisplanchenecus faecis*.<sup>86</sup> The highest POCP value  
863 was 50.6-51.9% to *H. faecis* (DSM 113194), whilst that to *M. intestini* (type species) and *M. formatexigens* (type species) were  
864 38.7-40.6% and 42.1-42.5%, respectively. However, ANI and GGDC values of the isolates to *H. faecis* were 71.4% and 20.5-  
865 22.9%, respectively, supporting the creation of a novel species to accommodate the isolates. Cells are rods (>2.0 µm in length),  
866 some are string like (longer than 10 µm), when grown in BHI medium under anaerobic conditions for 1-3 days. In total, 180-  
867 191 CAZymes were identified within the genomes. Gene prediction suggested the ability to utilise glucose and starch as  
868 carbon source. KEGG analysis identified pathways for the production of acetate from acetyl-CoA (EC:2.3.1.8, 2.7.2.1),  
869 propionate from propanoyl-CoA (EC:2.3.1.8, 2.7.2.1), L-glutamate from ammonia via L-glutamine (EC:6.3.1.2, 1.4.1.-),  
870 cobalamin (vitamin B12) from cobinamide (EC:2.5.1.17, 6.3.5.10, 6.2.1.10, 2.7.1.156), folate from 7,8-dihydrofolate  
871 (EC:1.5.1.3), and riboflavin (vitamin B2) from GTP (EC:3.5.4.25, 3.5.4.26, 1.1.1.193, 3.1.3.104, 4.1.99.12, 2.5.1.78, 2.5.1.9,  
872 2.7.1.26, 2.7.7.2). No antibiotic resistance genes were detected. Ecological analysis suggested that the isolates are most  
873 prevalent within amplicon datasets from the mouse gut (41.6-42.2%) at an average relative abundance of 0.24%. The G+C  
874 content of genomic DNA is 45.8-45.9%. The type strain, **CLA-AA-M05<sup>T</sup> (=DSM 111139<sup>T</sup>)**, was isolated from the caecal content  
875 of a SPF mouse in Aachen, Germany. Strain NM72\_1-8 (=DSM 110165) was isolated from an APC<sup>min/+ Msh2<sup>-/-</sup></sup> mouse in Toronto,  
876 Canada.

877 **Description of *Lactobacillus agrestimuris* sp. nov.** *Lactobacillus agrestimuris* (a.gres.ti.mu'ris. L. masc. adj. *agrestis*, wild; L.  
878 masc. or fem. n. *mus*, a mouse; N.L. gen. n. *agrestimuris*, of a wild mouse). The isolate has the highest 16S rRNA gene sequence  
879 similarity to *Lactobacillus* species (max. 96.83% to *Lactobacillus hamsteri*). GTDB-Tk assigned the genome to an unknown  
880 species within the genus *Lactobacillus*. The POCP value to *L. hamsteri* (75.0%) and to *Lactobacillus delbrueckii* (60.2%), the  
881 type species of the genus *Lactobacillus*, further supports this genus placement. Genome tree analysis identified *L. hamsteri*  
882 as the closest relative. As none of the closely related *Lactobacillus* species with a valid name has an ANI value >95% to the  
883 genome of the isolate, including *L. hamsteri* (ANI, 81.4%; GGDC, 21.6%), the creation of a novel species is required to  
884 accommodate the isolate. Cells were generally short rods (1.0 - 2.0 µm) when grown on WCA medium under aerobic or  
885 anaerobic conditions. The total number of CAZyme in the genome was 124. Genome analysis predicted the ability to utilise  
886 glucose as carbon source. KEGG analysis identified pathways for acetate production from acetyl-CoA (EC:2.3.1.8, 2.7.2.1) and  
887 propionate from propanoyl-CoA (EC:2.3.1.8, 2.7.2.1). No antibiotic resistance genes were detected. The 16S rRNA gene  
888 sequence of the species was most prevalent in the chicken gut (84.8% of 1,000 samples positive, at an average relative  
889 abundance of 9.94%), followed by human vagina (84.4%), and pig gut (68.1%). The type strain is **CLA-SR-99<sup>T</sup> (=DSM110155<sup>T</sup>)**.  
890 Its G+C content of genomic DNA is 34.8 mol%. It was isolated from the caecal content of a wild mouse.

891 **Description of *Lactococcus muris* sp. nov.** *Lactococcus muris* (mu'ris L. gen. n. *muris* of a mouse). Based on 16S rRNA gene  
892 sequence analysis (883 bp), the isolate is phylogenetically related to multiple species within the genus *Lactococcus*, with  
893 highest sequence identity to *Lactococcus garvieae* subsp. *garvieae* (96.72%). GTDB-Tk classified the genome as "Lactococcus  
894 sp002492185". The highest POCP value was 73.72% to *L. garvieae* and that to the type species of the genus, *L. lactis*, was  
895 61.4%. This together with genome tree analysis confirmed classification of the isolate within the genus *Lactococcus*. The  
896 status of a novel species was confirmed by ANI (82.6%) and GGDC (26.7-26.8%) values to *L. garvieae*. The total number of  
897 CAZymes identified in the genome was 142. Genome analysis predicted the ability to utilise arbutin, salicin, cellobiose, and  
898 starch as carbon sources. KEGG analysis identified pathways for acetate production from acetyl-CoA (EC:2.3.1.8, 2.7.2.1),  
899 propionate from propanoyl-CoA (EC:2.3.1.8, 2.7.2.1), L-cysteine and acetate from sulfide and L-serine (EC:2.3.1.30, 2.5.1.47),  
900 and folate (vitamin B9) from 7,8-dihydrofolate (EC:1.5.1.3) No antibiotic resistance genes were identified. The 16S rRNA gene  
901 sequence of the species was most prevalent in wastewater (11.1% of 1,000 samples positive), followed by pig gut (8.8%), and  
902 activated sludge (6.5%). The type strain is **HZI-1<sup>T</sup> (=DSM 109779<sup>T</sup>)**. Its G+C content of genomic DNA is 39.2 mol%. It was  
903 isolated from the caecal content of an SPF mouse.

904 **Description of *Lactococcus ileimucosae* sp. nov.** *Lactococcus ileimucosae* (*i.le.i.mu.co'sae*. L. neut. n. *ileum*, ileum; N.L. fem.  
905 n. *mucosa*, mucosa; N.L. gen. n. *ileimucosae*, of ileal mucosa, the mouse tissue used for isolation). The closest relatives based  
906 on 16S rRNA gene sequences were species within the genus *Lactococcus* (max. 98.14% to *Lactococcus formosensis*). GTDB-Tk  
907 classified the genome as an unknown species within the genus *Lactococcus*. The highest POCP value was to *L. formosensis*  
908 (74.8%), and that to *L. lactis* (the type species of this genus) was 61.0%, supporting assignment within the genus *Lactococcus*.  
909 This was confirmed by genome tree analysis. As none of the closest relatives shared ANI and GGDC values above the  
910 corresponding species delineation thresholds of 95% and 70%, respectively, including *L. formosensis* (ANI, 82.06%; GGDC,  
911 26.50%) and *Lactococcus garvieae* subsp. *garvieae* (a close relative in the genome tree; ANI, 82.16%; GGDC, 32.10%), a novel  
912 species is proposed to accommodate this isolate. Cells grow as spindle-shaped coccobacilli (ca. 1.0 µm in length) in BHI  
913 medium under anaerobic conditions. The number of CAZymes identified in the genome was 146. Genome analysis predicted  
914 the ability to utilise arbutin, salicin, cellobiose, starch as carbon source. KEGG analysis identified pathways for the production  
915 of acetate from acetyl-CoA (EC:2.3.1.8, 2.7.2.1), propionate from propanoyl-CoA (EC:2.3.1.8, 2.7.2.1), L-cysteine and acetate  
916 from sulfide and L-serine (EC:2.3.1.30, 2.5.1.47), and folate (vitamin B9) from 7,8-dihydrofolate (EC:1.5.1.3). No antibiotic  
917 resistance genes were detected. The 16S rRNA gene sequence of the species was most prevalent in the pig gut (8.9% of 1,000  
918 samples positive), followed by wastewater (7.7%), and insect gut (6.2%). The type strain is **M9-GB-M-SO-A<sup>T</sup>** (=DSM 107391<sup>T</sup>).  
919 Its G+C content of genomic DNA is 39.5 mol%. It was isolated from the jejunal/ileal mucosa of a wild mouse.

920 **Description of *Lepagella* gen. nov.** *Lepagella* (Le.pa.gel'la. N.L. fem. n. *Lepagella*, in honour of Dr. Patricia Lepage, INRAE,  
921 Jouy-en-Josas, France, for her contribution to the field of gut microbiome research in health and disease). The closest  
922 neighbours based on 16S rRNA gene sequence comparison are species within family *Muribaculaceae* (max. 86.91% to  
923 *Duncaniella freteri*). GTDB-Tk assigned the isolate to the species 'sp002493045', within the yet unknown genus 'CAG-485'  
924 (family *Muribaculaceae*). Phylogenetic analysis identified the genome to be in the same clade as *Muribaculum intestinale*.  
925 However, none of the close relatives with a valid name was characterized by a POCP value >50 %, including *M. intestinale*  
926 (type genus of the family; 41.9%) and *Duncaniella muris* (44.4%). This data supports the creation of a novel genus to  
927 accommodate the isolate. The type species is *Lepagella muris*.

928 **Description of *Lepagella muris* sp. nov.** *Lepagella muris* (mu'ris L. gen. n. *muris* of a mouse). The species has all features of  
929 the genus. It grows in Columbia Blood Medium (5 % sheep blood) under anaerobic conditions within 3 days. In total, 371  
930 CAZymes were identified within the genome. Gene prediction revealed the ability to utilise starch as carbon source. KEGG  
931 analysis identified pathways for the production of acetate from acetyl-CoA (EC:2.3.1.8, 2.7.2.1), propionate from propanoyl-  
932 CoA (EC:2.3.1.8, 2.7.2.1), L-cysteine and acetate from sulfide and L-serine (EC:2.3.1.30, 2.5.1.47), L-glutamate from ammonia  
933 via L-glutamine (EC:6.3.1.2, 1.4.1.-), cobalamin (vitamin B12) from cobinamide (EC:2.5.1.17, 6.3.5.10, 6.2.1.10, 2.7.1.156), and  
934 folate (vitamin B9) from 7,8-dihydrofolate (EC:1.5.1.3). Antibiotic resistance may be conferred via tetracycline-resistant  
935 ribosomal protection protein (ARO:0000002). The 16S rRNA gene sequence of the species was most prevalent in the mouse  
936 gut (31.1% of 1,000 samples positive, mean rel. abund. 2.73%), followed by human skin (5.1%), and pig gut (3.0%). The type  
937 strain is **NM04\_E33<sup>T</sup>** (=DSM 110157<sup>T</sup>). Its G+C content of genomic DNA is 46.1 mol%. It was isolated from caecal/colon content  
938 of an APC<sup>min/+</sup> Msh2<sup>-/-</sup> mouse.

939 **Description of *Limosilactobacillus caecicola* sp. nov.** *Limosilactobacillus caecicola* (cae.ci'co.la. L. neut. n. *caecum*, caecum;  
940 L. masc./fem. suff. *-cola*, dweller; from L. masc./fem. n. *incola*, inhabitant, dweller; N.L. n. *caecicola*, an inhabitant of the  
941 caecum). The closest relative based on 16S rRNA gene sequence identity is *Limosilactobacillus coleohominis* (98.66%). GTDB-  
942 Tk classified the genome as an unknown species within the genus *Limosilactobacillus*. The highest POCP value was 76.0 % to  
943 *L. coleohominis*, whilst that to *L. fermentum* (the type species of the genus *Limosilactobacillus*) was 66.9%. The genome tree  
944 also placed the bacterium within limosilactobacilli next to *L. coleohominis*. Genome comparison to the type strain of the latter  
945 species using ANI and GGDC indicates that the isolate represents a novel species (79.9% and 19.3%, respectively). Cells are  
946 straight to slightly curved rods (1-2 µm in length) when grown on WCA medium under anaerobic conditions for 2-3 days. In  
947 total, 115 CAZymes were identified within the genome. KEGG analysis identified pathways for acetate production from acetyl-  
948 CoA (EC:2.3.1.8, 2.7.2.1), and propionate from propanoyl-CoA (EC:2.3.1.8, 2.7.2.1). No carbon source utilisation (of those  
949 tested in Protologger) and antibiotic resistance genes were predicted. The 16S rRNA gene sequence of the species was most  
950 prevalent in the chicken gut (32.5% of 1,000 samples positive), followed by pig gut (27.8%), and human vagina (9.9%). The  
951 type strain is **CLA-SR-145<sup>T</sup>** (=DSM 110982<sup>T</sup>). Its G+C content of genomic DNA is 44.7 mol%. It was isolated from the caecal  
952 content of a wild mouse.

953 **Description of *Limosilactobacillus agrestimuris* sp. nov.** *Limosilactobacillus agrestimuris* (a.gres.ti.mu'ris. L. masc. adj.  
954 *agrestis*, wild; L. masc. or fem. n. *mus*, a mouse; N.L. gen. n. *agrestimuris*, of a wild mouse). The isolate shares highest 16S  
955 rRNA gene sequence identities to species within the genus *Limosilactobacillus* (max. 99.87% to *Limosilactobacillus*  
956 *urinaemulieris*). GTDB-Tk classified the genome as an unknown species within the genus *Limosilactobacillus*. The highest POCP  
957 value was to *Limosilactobacillus vaginalis* (82.6%), whilst value to *Limosilactobacillus fermentum* (the type species of this  
958 genus) was 63.3%. This supports placement of the isolate within the genus *Limosilactobacillus*. Genome tree analysis placed  
959 the isolate next to *L. vaginalis*. However, none of the close relatives (including *L. urinaemulieris* and *L. vaginalis*) share ANI  
960 and GGDC values above the species delineation cut-off points, confirming the status of this isolate as a novel species within  
961 the genus *Limosilactobacillus*. The bacterium grows well on WCA medium under anaerobic conditions within 1-3 days. The  
962 total number of CAZymes identified in the genome was 118. Genome analysis could not identify any genes related to carbon  
963 source utilisation, but predicted the ability to produce acetate, propionate, and folate. No antibiotic genes were detected.

964 The 16S rRNA gene sequence of the species was most prevalent in the chicken gut (91.2% of 1,000 samples positive, at an  
965 average relative abundance of 2.63%), followed by pig gut (81.0%), and mouse gut (40.5%). The type strain is **WCA-sto-4T**  
966 (=DSM 106037<sup>T</sup>). Its G+C content of genomic DNA is 39.7 mol%. It was isolated from the gut content of a wild mouse.

967 **Description of *Mediterraneibacter agrestimuris* sp. nov.** *Mediterraneibacter agrestimuris* (a.gres.ti.mu'ris. L. masc. adj.  
968 *agrestis*, wild; L. masc. or fem. n. *mus*, a mouse; N.L. gen. n. *agrestimuris*, of a wild mouse). The closest phylogenetic  
969 neighbours to the isolate based on 16S rRNA gene sequences was *Ruminococcus torques* (96.74%), followed by *Faecalicatena*  
970 *contorta* (96.31%) and *Mediterraneibacter glycyrrhizinilyticus* (96.31%). GTDB-Tk assigned the genome as an unknown species  
971 under the genus *Muricomes*. However, the POCP value to *Muricomes intestini* (type species), *Faecalicatena contorta* (type  
972 species), *Ruminococcus torques*, and *Ruminococcus flavefaciens* (type species) were 36.5%, 45.8%, 47.8%, and 22.7%,  
973 respectively, all below the genus delineation threshold. The highest POCP value was to *M. glycyrrhizinilyticus* (56.23%), and  
974 the value to *Mediterraneibacter massiliensis* (the type species of the genus *Mediterraneibacter*) was 50.11%. The genome  
975 tree analysis also identified *M. glycyrrhizinilyticus* as the closest relative. Moreover, the 16S rRNA gene sequence identity  
976 between the isolate and *M. intestini* is only 93.93%. These analyses indicate that the isolate belongs to the genus  
977 *Mediterraneibacter* and not *Muricomes*. None of the closely related species (including *M. glycyrrhizinilyticus*, ANI: 78.9%,  
978 GGDC: 21.5%) had ANI and GGDC values above the species cut-off value, confirming the status of this isolate as a novel  
979 species. Cells grow as rods (ca. 1.8-3.0 µm in length) in WCA medium under anaerobic conditions for 1-3 days. The total  
980 number of CAZymes identified in the genome was 263. Genome analysis predicted the ability to utilise starch, cellulose,  
981 sulfide, and L-serine. The genes for production of acetate, propionate, L-cysteine, L-glutamate, and folate were detected. The  
982 presence of the genes for tetracycline-resistant ribosomal protection protein (ARO:000002), *vanR* (ARO:3000574), and *vanS*  
983 (ARO:3000071) suggests antibiotic resistance. The 16S rRNA gene sequence of the species was most prevalent in wastewater  
984 (34.4% of 1,000 samples positive), followed by the human gut (27.5%); the prevalence in mouse gut was 11.0% (average  
985 relative abundance, 0.34%). The type strain is **CLA-SR-176<sup>T</sup>** (=DSM 111629<sup>T</sup>). Its G+C content of genomic DNA is 41.9 mol%. It  
986 was isolated from the caecal content of a wild mouse.

987 **Description of *Muribaculum caecicola* sp. nov.** *Muribaculum caecicola* (cae.ci'co.la. L. neut. n. *caecum*, caecum; L. masc./fem.  
988 suff. *-cola*, dweller; from L. masc./fem. n. *incola*, inhabitant, dweller; N.L. n. *caecicola*, an inhabitant of the caecum). The  
989 isolate shares closest 16S rRNA gene identity to *Muribaculum intestinale* (90.77%), the type species of the genus  
990 *Muribaculum*. GTDB-Tk identified the genome as 'Muribaculum sp002473395' under the genus *Muribaculum*. Both the POCP  
991 value of 57.0% to *M. intestinale* and topology of the genomic tree support this genus-level classification. The ANI and GGDC  
992 value to *M. intestinale* were 71.1% and 39.3%, respectively, confirming the novel species status of this isolate. It grows in  
993 Anaerobic Brain Heart Infusion under anaerobic conditions within 24 h. The total number of CAZymes identified in the  
994 genome was 189. Genome analysis predicted the ability to utilise starch and to produce acetate, propionate, L-glutamate,  
995 and riboflavin (vitamin B2). No antibiotic resistance genes were identified. The 16S rRNA gene sequence of the species was  
996 most prevalent in the mouse gut (27.4% of 1,000 samples positive). The type strain is **NM86\_A22<sup>T</sup>** (=DSM 110169<sup>T</sup>). Its G+C  
997 content of genomic DNA is 45.7 mol%. It was isolated from the caecal/colon content of an APC<sup>min/+</sup> Msh2<sup>-/-</sup> mouse.

998 **Description of *Muricaebacterium* gen. nov.** *Muricaebacterium* (Mu.ri.cae.ci.bac.te.ri.um. L. masc. n. *mus*, a mouse; L.  
999 neut. n. *caecum*, the caecum; bacterium, L. neut. n. a bacterium; *Muricaebacterium*, a microbe from the caecum of a  
1000 mouse). The closest phylogenetic neighbours based on 16S rRNA gene sequence similarity are species within the genus  
1001 *Olsenella* (max. 92.78% to *Olsenella umbonata*). GTDB-Tk classified the isolate as an unknown genus within the family  
1002 *Atopobiaceae*. The highest POCP value was 52.1% to *Olsenella uli*, the type species of the genus *Olsenella*, whilst 48.2 % to  
1003 *Atopobium minutum*, the type species of the genus *Atopobium*. Although the genome tree analysis placed the isolate within  
1004 the family *Atopobiaceae*, it branched separately from members of the genera *Olsenella* and *Atopobium*. Together with the  
1005 GTDB-Tk assignment aforementioned, this supports the creation of a novel genus status for the isolate. The type species is  
1006 *Muricaebacterium torontonense*.

1007 **Description of *Muricaebacterium torontonense* sp. nov.** *Muricaebacterium torontonense* (N.L. neut. adj. *torontonense*,  
1008 pertaining to Toronto (Canada), where the bacterium was isolated). The species has all features of the genus. Cells usually  
1009 grow singly, in pairs or in short serpentine chains in Sulfite Polymyxin Sulfadiazine medium under anaerobic conditions for up  
1010 to 3 days. In total, 94 CAZymes were identified within the genome of the type strain. Further genome analyses predicted the  
1011 ability to utilise arbutin, salicin, cellobiose, maltose, and starch. KEGG analysis identified the pathways for production of  
1012 acetate from acetyl-CoA (EC:2.3.1.8, 2.7.2.1), propionate from propanoyl-CoA (EC:2.3.1.8, 2.7.2.1), L-glutamate from  
1013 ammonia via L-glutamine (EC:6.3.1.2, 1.4.1.-), and folate (vitamin B9) from 7,8-dihydrofolate (EC:1.5.1.3). No antibiotic  
1014 resistance genes were detected. The 16S rRNA gene sequence of the species was most prevalent in the mouse gut (10.5% of  
1015 1,000 samples positive). The type strain is **NM07\_P-09<sup>T</sup>** (=DSM 110159<sup>T</sup>). Its molecular G+C content of genomic DNA is 58.8  
1016 mol%. It was isolated from the caecal content of an APC<sup>min/+</sup> Msh2<sup>-/-</sup> mouse.

1017 **Description of *Neobacillus muris* sp. nov.** *Neobacillus muris* (mu'ris L. gen. n. *muris* of a mouse). The closest phylogenetic  
1018 neighbour to the isolate based on 16S rRNA gene sequence similarity is *Neobacillus drentensis* (98.22%). GTDB-Tk assignment  
1019 to the genus *Neobacillus* was confirmed by POCP values >50% to multiple *Neobacillus* spp., including *N. drentensis* (64.37%)  
1020 and *Neobacillus cucumis* (65.54%). In addition to a lack of species assignment by GTDB-Tk, comparison to all close relatives  
1021 provided ANI values below 95%, supporting the assignment of a novel species within the genus *Neobacillus*. The isolate was  
1022 observed to have a large CAZyme repertoire, containing 348 CAZymes along with the pathways for utilisation of glucose,  
1023 trehalose, maltose, and starch. The antibiotic resistance genes, *vanR* (ARO:3000574), *vanZ* (ARO:3000116), and *vanS*  
1024 (ARO:3000071) were detected within the genome, along with a major facilitator superfamily (MFS) antibiotic efflux pump

1025 (ARO:0010002). Acetate, butyrate, and propionate were all predicted to be produced. Genome analysis also identified the  
1026 presence of pathways for the production of cobalamin (vitamin B12) from cobinamide (EC:2.5.1.17, 6.3.5.10, 6.2.1.10,  
1027 2.7.1.156), folate (vitamin B9) from 7,8-dihydrofolate (EC:1.5.1.3) and riboflavin (vitamin B2) from GTP (EC:3.5.4.25, 3.5.4.26,  
1028 1.1.1.193, 3.1.3.104, 4.1.99.12, 2.5.1.78, 2.5.1.9, 2.7.1.26, 2.7.7.2). The 16S rRNA gene sequence of the species was most  
1029 prevalent in the rhizosphere (71.2% of 1,000 samples positive), followed by soil (55.2%), and plant metagenomic samples  
1030 (49.1%). The type strain is **CLA-SR-152<sup>T</sup> (=DSM 110989<sup>T</sup>)**. Its G+C content of genomic DNA is 41.6 mol%. It was isolated from  
1031 caecal content of an SPF mouse.

1032 **Description of *Odoribacter lunatus* sp. nov.** *Odoribacter lunatus* (lu.na'tus. L. masc. adj. *lunatus*, crescent-shaped, pertaining  
1033 to the cell shape). According to 16S rRNA gene sequence analysis, the isolate is most closely related to *Odoribacter laneus*  
1034 (90.05%). GTDB-Tk assigned the genome as an unknown species within the genus *Odoribacter*. The highest POCP value was  
1035 to *Odoribacter laneus* (55.2%), whereas the value to *Odoribacter splanchnicus* (the type species of this genus) was 47.5%. The  
1036 genome tree also placed the isolate within a monophyletic clade with other two *Odoribacter* species. The ANI and GGDC value  
1037 of the isolate to these two *Odoribacter* species were all well below the species delineation cut-off point, therefore confirming  
1038 the novel status of the isolate within the genus *Odoribacter*. Cells are rods with pointy ends forming a crescent shape (length:  
1039 ca. 0.8-1.5 µm) when grown on mGAM agar under anaerobic conditions for 3-10 days. The total number of CAZymes identified  
1040 in the genome was 187. Genome analysis could not find any genes related to carbon source utilisation, but identified the  
1041 genes for production of acetate (from acetyl-CoA, EC:2.3.1.8, 2.7.2.1), propionate (from propanoyl-CoA, EC:2.3.1.8, 2.7.2.1),  
1042 L-glutamate (via L-glutamine, EC:6.3.1.2, 1.4.1.-), and riboflavin (vitamin B2; from GTP, EC:3.5.4.25, 3.5.4.26, 1.1.1.193,  
1043 3.1.3.104, 4.1.99.12, 2.5.1.78, 2.5.1.9, 2.7.1.26, 2.7.7.2). No antibiotic resistance genes were identified. The ecological analysis  
1044 based on 16S rRNA gene amplicons could not identify any ecosystem with the presence of this species. The type strain is **CLA-  
1045 AA-M09<sup>T</sup> (=DSM 112344<sup>T</sup>)**. Its G+C content of genomic DNA is 43.2 mol%. It was isolated from a filtered (0.45 µm) caecal  
1046 slurry from a wild mouse.

1047 **Description of *Otoolea* gen. nov.** *Otoolea* (O.too'le.a. N.L. fem. n. *Otoolea*, in honour of Prof. Dr. Paul O'Toole, University  
1048 College Cork, Ireland, for his contribution to the field of gut microbiome research). The isolate showed highest 16S rRNA gene  
1049 sequence similarities to species with family *Lachnospiraceae* (max. 94.20% to *Clostridium fessum*; classified under family  
1050 *Clostridiaceae* in LPSN). GTDB-Tk assigned the genome to the genus 'Clostridium\_Q' within family *Lachnospiraceae*. The  
1051 phylogenetic analysis identified the strain to be in a clade containing *Clostridium* species. However, none of the closest  
1052 relatives shared a POCP value above the genus delineation value (50 %), with a maximum value of 46.7% to *C. fessum*,  
1053 followed by *C. symbiosum* (45.3%). POCP value to *Clostridium butyricum*, the type species of this genus, was only 20.8 %. This  
1054 data supports the creation of a novel genus to accommodate the isolate. The type species is *Otoolea muris*.

1055 **Description of *Otoolea muris* sp. Nov.** *Otoolea muris* (mu'ris L. gen. n. *muris* of a mouse). The species has all features of the  
1056 genus. Cells are rods (1.0-5.0 µm in length) when grown in BHI medium under anaerobic conditions for 24 hours. In total, 310  
1057 CAZymes were identified in the genome. Gene prediction revealed the ability to utilise starch as carbon source. KEGG analysis  
1058 identified pathways for the production of acetate from acetyl-CoA (EC:2.3.1.8, 2.7.2.1), propionate from propanoyl-CoA  
1059 (EC:2.3.1.8, 2.7.2.1), L-cysteine and acetate from sulfide and L-serine (EC:2.3.1.30, 2.5.1.47), L-glutamate from ammonia via  
1060 L-glutamine (EC:6.3.1.2, 1.4.1.-), cobalamin (vitamin B12) from cobinamide (EC:2.5.1.17, 6.3.5.10, 6.2.1.10, 2.7.1.156), and  
1061 riboflavin (vitamin B2) from GTP (EC:3.5.4.25, 3.5.4.26, 1.1.1.193, 3.1.3.104, 4.1.99.12, 2.5.1.78, 2.5.1.9, 2.7.1.26, 2.7.7.2). No  
1062 antibiotic resistance genes were detected. The 16S rRNA gene sequence of the species was most prevalent in the mouse gut  
1063 (54.5% of 1,000 samples positive), followed by chicken gut (17.3%), and pig gut (12.7%). The type strain is **CLA-AA-M04<sup>T</sup>  
1064 (=DSM 111138<sup>T</sup>)**. Its G+C content of genomic DNA is 50.8 mol%. It was isolated from the caecal content of an SPF mouse.

1065 **Description of *Palleniella muris* sp. nov.** *Palleniella muris* (mu'ris L. gen. n. *muris* of a mouse). Based on previous analyses,  
1066 16S rRNA gene sequence similarities between members of the family *Prevotellaceae* have been shown to be uninformative  
1067 for the placement of novel isolates; this data is thus not included here.<sup>87</sup> Phylogenomic placement of the type strain identified  
1068 it as a member of the genus *Palleniella*, placed next to the type species of this genus, *Palleniella intestinalis*. ANI analysis to  
1069 all members of *Palleniella*, and the neighbouring genera (*Xylanibacter*, *Leyella*, *Hoylella*, *Segatella*, *Hallella*, and *Prevotella*),  
1070 confirmed that the type strain represents a novel species as all values were below the species delineation threshold of 95%.  
1071 The highest value was to *P. intestinalis* (92.05%). The isolate grows in Anaerobic Brain Heart Infusion under anaerobic  
1072 conditions within 3 days. In the genome, 306 CAZymes were identified along with pathways for the utilisation of starch. KEGG  
1073 analysis identified pathways for the production of acetate from acetyl-CoA (EC:2.3.1.8, 2.7.2.1), propionate from propanoyl-  
1074 CoA (EC:2.3.1.8, 2.7.2.1), L-glutamate from ammonia via L-glutamine (EC:6.3.1.2, 1.4.1.-), and folate (vitamin B9) from 7,8-  
1075 dihydrofolate (EC:1.5.1.3). Ecological analysis suggests that the species is most prevalent within amplicon datasets from the  
1076 mouse gut (2.3%) at an average relative abundance of 3.29%. The type strain is **NM73\_A23<sup>T</sup> (=DSM 110166<sup>T</sup>)**. Its G+C content  
1077 of genomic DNA is 47.1 mol%. It was isolated from the caecal/colon content of an APC<sup>min/+</sup> Msh2<sup>-/-</sup> mouse.

1078 **Description of *Parasutterella muris* sp. nov.** *Parasutterella muris* (mu'ris L. gen. n. *muris* of a mouse). The closest relative to  
1079 strain CLA-SR-150, CLA-RA-1, and NM82\_D38 based on 16S rRNA gene sequence identity was *Parasutterella*  
1080 *excrementihominis* (95.75-96.38%). GTDB-Tk classified the genome as an unknown species within the genus *Parasutterella*.  
1081 The highest POCP value was to *P. excrementihominis* (the type species of this genus; 74.1-78.8%), followed by *Turicimonas*  
1082 *muris* (71.4-74.5%). The genome tree analysis also identified *P. excrementihominis* as the closest relative. However, the ANI  
1083 and GGDC values to both *P. excrementihominis* and *T. muris* were all well below the species delineation cut-offs, justifying  
1084 the proposal to create a novel species within the genus *Parasutterella* to accommodate these isolates. Cells are rods (1.0-1.2  
1085 µm in length) when grown in WCA medium under anaerobic conditions for 1-5 days. The total number of CAZymes identified

1086 in the genomes were 91-94. Genome analysis predicted the ability to utilise sulfide and L-serine for production of L-cysteine  
1087 and acetate (EC:2.3.1.30, 2.5.1.47). No genes for carbon source utilisation were found. The 16S rRNA gene sequence of the  
1088 species was most prevalent in the mouse gut (27.3-27.9% of 1,000 samples positive), followed by chicken gut (3.6-4.1%). The  
1089 range of G+C content of genomic DNA of strains within this species is 48.9-49.4 mol%. The type strain is **CLA-SR-150<sup>T</sup> (=DSM**  
1090 **111000<sup>T</sup>)**. It was isolated from the caecal content of a conventionally colonized laboratory mouse. Strain CLA-RA-1 (=DSM  
1091 108034) and NM82\_D38 (=DSM 110635) were isolated from the gut content of a wild mouse and the caecal/colon content  
1092 of an APC<sup>min/+</sup> Msh2<sup>-/-</sup> mouse, respectively.

1093 **Description of *Petalouisia* gen. nov.** *Petalouisia* (Pe.tra.lou.i'si.a. N.L. fem. n. *Petalouisia*, in honour of Dr. Petra Louis,  
1094 Rowett Institute, Aberdeen, Scotland, for her contribution to the field of gut microbiology). Based on 16S rRNA gene  
1095 sequence similarities, the closest relatives to the isolate are *Ruminococcus gnavus* (90.93%), *Roseburia inulinivorans* (90.83%),  
1096 and *Enterocloster aldensis* (90.80%). GTDB-Tk assigned the isolate to the unknown genus 'g\_14-2' within family  
1097 *Lachnospiraceae*. Phylogenomic analysis confirmed that this genus falls within family *Lachnospiraceae* between members of  
1098 the genera *Eubacterium* and *Pseudobutyrvivibrio*. All POCP values to the closest relatives were below 50%, supporting the  
1099 creation of a novel genus to accommodate this isolate. The type species is *Petalouisia muris*.

1100 **Description of *Petalouisia muris* sp. nov.** *Petalouisia muris* (mu'ris L. gen. n. *muris* of a mouse). The species shares all  
1101 features of the genus. It grows in Anaerobic Brucella Medium supplemented with blood under anaerobic conditions within 4  
1102 days. In total, 316 CAZymes were identified within the genome of the type strain. Glucose, arbutin, salicin, trehalose, starch,  
1103 and cellulose were predicted to be utilised carbon sources. KEGG analysis identified pathways for the production of acetate  
1104 from acetyl-CoA (EC:2.3.1.8, 2.7.2.1), propionate from propanoyl-CoA (EC:2.3.1.8, 2.7.2.1), L-cysteine and acetate from sulfide  
1105 and L-serine (EC:2.3.1.30, 2.5.1.47), and L-glutamate from ammonia via L-glutamine (EC:6.3.1.2, 1.4.1.-). Genome analysis  
1106 also identified the presence of pathways for the production of cobalamin (vitamin B12) from cobinamide (EC:2.5.1.17,  
1107 6.3.5.10, 6.2.1.10, 2.7.1.156), folate (vitamin B9) from 7,8-dihydrofolate (EC:1.5.1.3), and riboflavin (vitamin B2) from GTP  
1108 (EC:3.5.4.25, 3.5.4.26, 1.1.1.193, 3.1.3.104, 4.1.99.12, 2.5.1.78, 2.5.1.9, 2.7.1.26, 2.7.7.2). Antibiotic resistance may be  
1109 conferred by expression of the glycopeptide resistance gene cluster vanR (ARO:3000574). Ecological analysis suggested that  
1110 the species is most prevalent within amplicon datasets from the mouse gut (36.0%) at an average relative abundance of  
1111 0.85%. The type strain is **NM01\_1-7b<sup>T</sup> (=DSM 110156<sup>T</sup>)**. Its G+C content of genomic DNA is 44.0 mol% It was isolated from  
1112 the caecal/colon content of an APC<sup>min/+</sup> Msh2<sup>+/-</sup> mouse.

1113 **Description of *Pumilibacteraceae* fam. nov.** *Pumilibacteraceae* (Pu.mi.li.bac.te.ra.ce'ae. N.L. masc. n. *Pumilibacter*, type  
1114 genus of the family; L. fem. pl. suff. *-aceae*, ending to denote a family; N.L. fem. pl. n. *Pumilibacteraceae*, the family of the  
1115 genus *Pumilibacter*). The closest phylogenetic relatives based on 16S rRNA gene similarities are *Christensenella*,  
1116 *Caldicoprobacter*, and *Saccharofermentans* spp. (<85.5%) within the order *Eubacteriales*. Phylogenomic analysis confirmed  
1117 that the isolates form a monophyletic group distinct from all close relatives. The creation of a novel family was further  
1118 supported by GTDB-Tk placement as 'f\_CAG-552' within the order '*Christensenellales*' (not valid). Taxonomic classification of  
1119 these bacteria at the order level, and the corresponding nomenclature, will require amendments in the future. Members of  
1120 this new family were identified to be prevalent within the gastrointestinal tract of mice, although at sub-dominant levels  
1121 (mean relative abundance <0.5%). The type genus of this family is *Pumilibacter*.

1122 **Description of *Pumilibacter* gen. nov.** *Pumilibacter* (Pu.mi.li.bac.ter. L. masc. n. *pumilus*, dwarf; N.L. masc. n. *bacter*, rod,  
1123 referring to a bacterium in biology; N.L. masc. n. *Pumilibacter*, dwarf bacterium, pertaining to the small size of the type  
1124 species). The closest phylogenetic relative based on 16S rRNA gene sequence identity are *Saccharofermentans acetigenes*  
1125 (83.99%, to CLA-AA-M08) and *Christensenella hongkongensis* (85.65%, to CLA-AA-M10). POCP values to all close relatives  
1126 were below 30% and GTDB-Tk placement assigned the type species to an unknown genus within family 'f\_CAG-552'. The type  
1127 species is *Pumilibacter muris*.

1128 **Description of *Pumilibacter intestinalis* sp. nov.** *Pumilibacter intestinalis* (in.tes.ti.na'lis. N.L. fem. adj. *intestinalis*, pertaining  
1129 to the intestine). The species has all features of the genus. Additional phylogenetic relatives based on 16S rRNA gene  
1130 sequences are *Ruminiclostridium josui* (84.32%), *Ruminiclostridium cellulolyticum* (84.11%), and *Vallitalea guaymasensis*  
1131 (83.95%). Assignment to the genus *Pumilibacter* was confirmed by a POCP value of 69.7% between the genome of the type  
1132 strain and that of the type species of the genus, *Pumilibacter muris*. Cells are rods (ca. 2.0 µm in length) to long rods (>5.0 µm  
1133 in length) with a diameter of ca. 0.4 µm when grown on YCFA or mGAM blood agar under anaerobic conditions for 7 days. In  
1134 total, 155 CAZymes were identified within the genome and only starch was predicted to be utilised as a carbon source. KEGG  
1135 analysis identified pathways for the production of acetate from acetyl-CoA (EC:2.3.1.8, 2.7.2.1), propionate from propanoyl-  
1136 CoA (EC:2.3.1.8, 2.7.2.1), L-cysteine and acetate from sulfide and L-serine (EC:2.3.1.30, 2.5.1.47), and L-glutamate from  
1137 ammonia via L-glutamine (EC:6.3.1.2, 1.4.1.-). Antibiotic resistance was predicted based on the detection of tetracycline-  
1138 resistant ribosomal protection protein. Ecological analysis suggested that the species is most prevalent within amplicon  
1139 datasets from the mouse gut (39.9%). The type strain is **CLA-AA-M10<sup>T</sup>**. Its G+C content of genomic DNA is 49.6%. It was  
1140 isolated from a filtered (0.45 µm) caecal suspension of an SPF mouse.

1141 **Description of *Pumilibacter muris* sp. nov. 1** *Pumilibacter muris* (mu'ris L. gen. n. *muris* of a mouse). The species has all  
1142 features of the genus. Additional phylogenetic relatives based on 16S rRNA gene sequences are *Xylanivirga thermophila*  
1143 (83.77%), *Ruminiclostridium josui* (83.68%), and *Hespellia porcina* (83.57%). Separation from the other novel species within  
1144 this genus represented by strain CLA-AA-M10 (described below) was confirmed via an ANI value of 76.4% and GGDC value of  
1145 25% between the two genomes. Cells are very small and spherical (diameter: 0.3-0.5 µm) when grown on YCFA agar under

1146 anaerobic conditions for 7 days. In total, 121 CAZymes were identified within the genome of the type strain and only starch  
1147 was predicted to be utilised as a carbon source. KEGG analysis identified pathways for the production of acetate from acetyl-  
1148 CoA (EC:2.3.1.8, 2.7.2.1), propionate from propanoyl-CoA (EC:2.3.1.8, 2.7.2.1), L-cysteine and acetate from sulfide and L-  
1149 serine (EC:2.3.1.30, 2.5.1.47), and L-glutamate from ammonia via L-glutamine (EC:6.3.1.2, 1.4.1.-). No antibiotic resistance  
1150 genes were identified within the genome. Ecological analysis suggested that the species is most prevalent within amplicon  
1151 datasets from the mouse gut (32.8%). The type strain is **CLA-AA-M08<sup>T</sup>**. Its G+C content of genomic DNA is 46.81%. It was  
1152 isolated from a filtered (0.45 µm) caecal suspension of an SPF mouse.

1153 **Description of *Senimuribacter* gen. nov. *Senimuribacter*** (Se.ni.mu.ri.bac.ter. L. masc. adj. *senex*, old; L. masc. n. or fem. *mus*,  
1154 a mouse; N.L. masc. n. *bacter*, rod; N.L. masc. n. *Senimuribacter*, rod-shaped bacterium isolated from old mouse). The closest  
1155 relatives based on 16S rRNA gene similarity are members of the genus *Eubacterium* (*Eubacterium sulci*, 91.54-92.20%,  
1156 *Eubacterium infirmum*, 91.30-92.20%) and *Aminipila* (*Aminipila butyrica*, 90.74-91.77%). Phylogenomic analysis indicated that  
1157 the isolate falls between members of the genera *Eubacterium* and *Mogibacterium*. The creation of a novel genus was further  
1158 supported by GTDB-Tk placement as 'g\_Emergencia', a genus proposed in 2016 but never validated.<sup>88</sup> POCP values to all close  
1159 relatives were <40%, greatly below the genus delineation threshold. The type species is *Senimuribacter intestinalis*.

1160 **Description of *Senimuribacter intestinalis* sp. nov. *Senimuribacter intestinalis*** (in.tes.ti.na'lis. N.L. fem. adj. *intestinalis*,  
1161 pertaining to the intestine). The species shares all features of the genus. The description of this species is based on two strains,  
1162 YCFAG-7-CC-SB-Schm-I and C1.7. Cells are rods (0.8-1.7 µm in length) when grown in WCA medium under anaerobic  
1163 conditions for 2-5 days. Strains of this species contain 102-113 CAZymes within their genome but no carbohydrate utilisation  
1164 pathways were identified. KEGG analysis identified pathways for the production of acetate from acetyl-CoA (EC:2.3.1.8,  
1165 2.7.2.1), butyrate from butanoyl-CoA (EC:2.8.3.8), propionate from propanoyl-CoA (EC:2.3.1.8, 2.7.2.1), L-cysteine and  
1166 acetate from sulfide and L-serine (EC:2.3.1.30, 2.5.1.47), folate (vitamin B9) from 7,8-dihydrofolate (EC:1.5.1.3), and riboflavin  
1167 (vitamin B2) from GTP (EC:3.5.4.25, 3.5.4.26, 1.1.1.193, 3.1.3.104, 4.1.99.12, 2.5.1.78, 2.5.1.9, 2.7.1.26, 2.7.7.2). Ecological  
1168 analysis suggested that the species is most prevalent within amplicon datasets from the mouse gut (ca. 51%). The type strain  
1169 is **YCFAG-7-CC-SB-Schm-I<sup>T</sup> (=DSM 106208<sup>T</sup>)**. Its G+C content of genomic DNA is 43.9 mol%. It was isolated from caecal content  
1170 of a 40-week-old SPF mouse in Freising, Germany. Strain C1.7 (=DSM 109599) was isolated from caecal content of an SPF  
1171 mouse in Braunschweig (Germany), respectively.

1172 **Description of *Stenotrophomonas muris* sp. nov. *Stenotrophomonas muris*** (mu'ris L. gen. n. *muris* of a mouse). The isolate  
1173 shared highest 16S rRNA gene sequence similarities to species within the genus *Stenotrophomonas* (*Stenotrophomonas*  
1174 *maltophilia* and *Stenotrophomonas pavanii*, 99.72%). GTDB-Tk classified the genome under the genus *Stenotrophomonas* as  
1175 '*Stenotrophomonas maltophilia\_F*'. The highest POCP value was to the genome of *S. maltophilia* (87.40%), which also  
1176 supports classification within the genus *Stenotrophomonas*. The genome tree placed the genome in the same clade as *S.*  
1177 *maltophilia*, *S. pavanii*, and *Pseudomonas geniculata* (synonym: *Stenotrophomonas geniculata*). However, none of these  
1178 species shared ANI and GGDC value above 95% and 70%, respectively, with the genome of this isolate, confirming its status  
1179 as a novel species. In total, 261 CAZymes were identified within the genome, along with the pathway for starch utilisation.  
1180 KEGG analysis identified pathways for L-glutamate production from ammonia via L-glutamine (EC:6.3.1.2, 1.4.1.-). The  
1181 following antibiotic resistance genes were detected: resistance-nodulation-cell division (RND) antibiotic efflux pump  
1182 (ARO:0010004), *aph(3')* (ARO:3000126), and L1 family beta-lactamase (ARO:3004215). The 16S rRNA gene sequence of the  
1183 species was most prevalent in the rhizosphere (53.1% of 1,000 samples positive), followed by plant microbiota (43.5%), and  
1184 wastewater (40.3%). The type strain is **PT2-440Y<sup>T</sup> (=DSM28631<sup>T</sup>)**. Its G+C content of genomic DNA is 66.7 mol%. It was isolated  
1185 from the caecal content of a TNF<sup>delta</sup>ARE<sup>+/+</sup> mouse.<sup>12</sup>

1186 **Description of *Streptococcus caecimuris* sp. nov. *Streptococcus caecimuris*** (cae.ci.mu'ris. L. neut. adj. *caecum*, caecum; L.  
1187 gen. masc./fem. n. *muris*, of a mouse; N.L. gen. n. *caecimuris*, from the caecum of a mouse). Based on 16S rRNA gene sequence  
1188 analysis, the isolate is considered to belong to the species *Streptococcus parasanguinis* (99.18% identity). However, GTDB-Tk  
1189 classified the genome as '*Streptococcus parasanguinis\_B*'. The isolate has POCP values >50 % to multiple *Streptococcus*  
1190 species, including *S. parasanguinis* (89.4%, the highest value), and *S. pyogenes* (the type species of this genus, 54.6%).  
1191 Genome tree analysis confirmed the genus assignment by placing the isolate within the monophyletic cluster of *Streptococcus*  
1192 species. ANI values <95 % to *Streptococcus* spp. with a valid name (highest to *S. parasanguinis*, ANI: 94.8%, GGDC: 55.90%)  
1193 support the proposal to create a novel species. The bacterium grows in BHI medium under anaerobic conditions, with visible  
1194 turbidity observed within 2-3 days. The total number of CAZymes identified in the genome was 136. Further genome analyses  
1195 predicted the ability to utilise glucose, cellobiose, and starch. KEGG analysis identified the pathways for production of acetate  
1196 from acetyl-CoA (EC:2.3.1.8, 2.7.2.1), propionate from propanoyl-CoA (EC:2.3.1.8, 2.7.2.1), L-cysteine and acetate from sulfide  
1197 and L-serine (EC:2.3.1.30, 2.5.1.47), and folate (vitamin B9) from 7,8-dihydrofolate (EC:1.5.1.3). The detection of the genes  
1198 for ATP-binding cassette (ABC) antibiotic efflux pump (ARO:0010001) may indicate antibiotic resistance. The 16S rRNA gene  
1199 sequence of the species was most prevalent in the human oral cavity (91.3% of 1,000 samples positive, at an average relative  
1200 abundance of 9.11%), followed by human lung (81.3%, at an average relative abundance of 9.10%), and human gut (81.2%,  
1201 at an average relative abundance of 1.74%). The type strain is **CLA-AV-18<sup>T</sup> (=DSM 110150<sup>T</sup>)**. Its G+C content of genomic DNA  
1202 is 42.1 mol%, similar to *S. parasanguinis* (41.7 mol%). It was isolated from the caecal content of an SPF mouse.

1203 **Description of *Terrisporobacter muris* sp. nov. *Terrisporobacter muris*** (mu'ris L. gen. n. *muris* of a mouse). The closest 16S  
1204 rRNA gene sequence similarity was to *Terrisporobacter mayombeii* (99.23%) and *Terrisporobacter glycolicus* (99.16%). GTDB-  
1205 Tk classified the genome within the genus *Terrisporobacter*. The highest POCP value of the genome was to *T. mayombeii*  
1206 (87.45%) and *T. glycolicus* (87.18%) and the genome tree analysis placed the isolate next to *T. glycolicus*. These analyses

1207 confirm the placement of the isolate within the genus *Terrisporobacter*. However, the ANI and GGDC values to the two  
1208 *Terrisporobacter* species aforementioned (87.45%/34.60% and 87.18%/34.20%, respectively) were below species delineation  
1209 thresholds, which justifies the proposal to create a novel species within the genus *Terrisporobacter*. Of note, the isolate was  
1210 found to represent the same species as '*Terrisporobacter othiniensis*',<sup>89</sup> with ANI and GGDC values of 96.40% and 89.16%,  
1211 respectively. However, this name has never been validated. The number of CAZymes identified in the genome was 198.  
1212 Genome analysis predicted the ability to utilise glucose, arbutin, salicin, cellobiose, maltose, and starch as carbon source.  
1213 KEGG analysis identified pathways for the production of acetate from acetyl-CoA (EC:2.3.1.8, 2.7.2.1), butyrate from butanoyl-  
1214 CoA (EC:2.8.3.8), propionate from propanoyl-CoA (EC:2.3.1.8, 2.7.2.1), L-cysteine and acetate from sulfide and L-serine  
1215 (EC:2.3.1.30, 2.5.1.47), L-glutamate from ammonia via L-glutamine (EC:6.3.1.2, 1.4.1.-), cobalamin (vitamin B12) from  
1216 cobinamide (EC:2.5.1.17, 6.3.5.10, 6.2.1.10, 2.7.1.156), folate (vitamin B9) from 7,8-dihydrofolate (EC:1.5.1.3), and riboflavin  
1217 (vitamin B2) from GTP (EC:3.5.4.25, 3.5.4.26, 1.1.1.193, 3.1.3.104, 4.1.99.12, 2.5.1.78, 2.5.1.9, 2.7.1.26, 2.7.7.2). The antibiotic  
1218 resistance genes MFS type drug efflux (ARO:0010002) and tetracycline-resistant ribosomal protection protein (ARO:0000002)  
1219 were identified. The 16S rRNA gene sequence of the species was most prevalent in pig gut microbiota (75.8% of 1,000 samples  
1220 positive), followed by wastewater (54.8%), and activated sludge (53.2%). The type strain is **CCK3R4-PYG-107<sup>T</sup> (=DSM29186<sup>T</sup>)**.  
1221 Its G+C content of genomic DNA is 28.7 mol%. It was isolated from the caecal content of an SPF mouse.<sup>12</sup>

1222 **Description of *Veillonella agrestimuris* sp. nov.** *Veillonella agrestimuris* (a.gres.ti.mu'ris. L. masc. adj. *agrestis*, wild; L. masc.  
1223 or fem. n. *mus*, a mouse; N.L. gen. n. *agrestimuris*, of a wild mouse). The closest phylogenetic neighbours to the isolate are  
1224 species within the genus *Veillonella* (max. 98.32% to *Veillonella caviae*). GTDB-Tk classified the genome as an unknown species  
1225 within the genus *Veillonella*. The POCP value was >50 % to multiple *Veillonella* species, including *Veillonella parvula*, the type  
1226 species of this genus (80.0%). The genome tree analysis placed the isolate within a monophyletic cluster of *Veillonella* species.  
1227 ANI values <95 % to all close relatives with a valid name and to our other isolate from this genus ('*Veillonella intestinalis*;  
1228 described above) support the creation of a novel species. Cells are coccoid (ca. 0.5-0.8 µm in diameter) when grown in WCA  
1229 medium under anaerobic conditions for 3-4 days. The isolate appeared to have a limited CAZYme repertoire, with only 88  
1230 CAZymes identified. Genome analysis could not find any pathway for carbon source utilisation, but predicted the ability to  
1231 produce L-cysteine and acetate (from sulfide and L-serine; EC:2.3.1.30, 2.5.1.47), cobalamin (vitamin B12, from cobinamide;  
1232 EC:2.5.1.17, 6.3.5.10, 6.2.1.10, 2.7.1.156), and folate (from 7,8-dihydrofolate; EC:1.5.1.3). No antibiotic genes were identified.  
1233 The 16S rRNA gene sequence of the species was most prevalent in the pig gut (33.7% of 1,000 samples positive), followed by  
1234 human gut (20.3%), and human lung (18.3%). The type strain is **CLA-SR-113<sup>T</sup> (=DSM 110088<sup>T</sup>)**. Its G+C content of genomic  
1235 DNA is 39.1 mol%, similar to *V. caviae* (38.4 mol%). It was isolated from the caecal content of a wild mouse.

1236 **Description of *Veillonella intestinalis* sp. nov.** *Veillonella intestinalis* (in.tes.ti.na'lis. N.L. fem. adj. *intestinalis*, pertaining to  
1237 the intestine). Strain CLA-AV-13 and Trib-3-CC-2-C show highest 16S rRNA gene identity values to species within the genus  
1238 *Veillonella* (max. 96.64% to *Veillonella criceti*). GTDB-Tk classified the genomes as an unknown species within the genus  
1239 '*Veillonella\_A*' (family *Veillonellaceae*). The POCP value of the isolates were >50% to species within the genus *Veillonella*,  
1240 including *V. criceti* (the highest, 84.8-87.0%) and *Veillonella parvula*, the type species of this genus (66.7-69.2%). The genome  
1241 tree analysis placed the isolates within the same clade as *Veillonella seminalis* and *Veillonella magna*. ANI values <95 % to all  
1242 close relatives with a valid name, including *V. criceti* (ANI: 83.2-83.3%, GGDC: 26.9%) support the proposal to create a novel  
1243 species to accommodate the isolates. Cells are coccobacilli (0.5-0.8 µm in length) when grown in BHI or WCA media under  
1244 anaerobic conditions for 1-3 days. Genome analysis could not identify any genes for the utilisation of carbon sources, but  
1245 detected the genes for production of acetate (from acetyl-CoA; EC:2.3.1.8, 2.7.2.1), propionate (from propanoyl-CoA;  
1246 EC:2.3.1.8, 2.7.2.1), folate (from 7,8-dihydrofolate; EC:1.5.1.3), and riboflavin (vitamin B2, from GTP; EC:3.5.4.25, 3.5.4.26,  
1247 1.1.1.193, 3.1.3.104, 4.1.99.12, 2.5.1.78, 2.5.1.9, 2.7.1.26, 2.7.7.2). The detection of genes for lincosamide  
1248 nucleotidyltransferase (LNU; ARO:3000221) may indicate antibiotic resistance. The 16S rRNA gene sequence of the species  
1249 was most prevalent in the pig gut (19.7% of 1,000 samples positive), followed by wastewater (8.4%), and human gut (5.6%).  
1250 The G+C content of genomic DNA of the species is 38.2-38.3 mol%, similar to *V. criceti* (38.4 mol%). The type strain is **CLA-  
1251 AV-13<sup>T</sup> (=DSM 110113<sup>T</sup>)**. It was isolated from the caecal content of a wild mouse in Aachen, Germany. Strain Trib-3-CC-2-C  
1252 (=DSM 105313) was also isolated from the caecal content of another wild mouse in Freising, Germany).

1253 **Description of *Vermiculatibacterium* gen. nov.** *Vermiculatibacterium* (Ver.mi.cu.la.ti.bac.te.ri.um. L. masc. adj. *vermiculatus*,  
1254 in the form of worms; N.L. neut. n. *bacterium*, a small rod, and in biology, a bacterium; N.L. neut. n. *Vermiculatibacterium*, a  
1255 worm-shaped bacterium). The closest relative to the isolate based on 16S rRNA gene sequence identity is *Flintibacter*  
1256 *butyricus* (95.14%). GTDB-Tk classified the genome in the genus '*Marseille-P3106*' within family *Oscillospiraceae*. Phylogenetic  
1257 analysis showed the isolate as a separate branch within the cluster containing members of multiple genera within family  
1258 *Oscillospiraceae* (*Oscillibacter*, *Intestinimonas*, *Flavonifractor*, and *Pseudoflavonifractor*). The highest POCP value was 50.1%  
1259 to *Intestinimonas butyriciproducens* (type species of this genus), whereas values to the other type species of neighbouring  
1260 genera, *Oscillibacter valericigenes* (34.1%), *Pseudoflavonifractor capillosus* (43.2%), *Flavonifractor plautii* (46.9%), and *F.*  
1261 *butyricus* (39.7%) were all clearly below the genus delineation threshold. Based on the GTDB-Tk assignment, genomic tree  
1262 analysis, and borderline POCP value to *I. butyriciproducens*, we propose to create the novel genus *Vermiculatibacterium* to  
1263 accommodate this isolate. The type species is *Vermiculatibacterium agrestimuris*.

1264 **Description of *Vermiculatibacterium agrestimuris* sp. nov.** *Vermiculatibacterium agrestimuris* (a.gres.ti.mu'ris. L. masc. adj.  
1265 *agrestis*, wild; L. masc. or fem. n. *mus*, a mouse; N.L. gen. n. *agrestimuris*, of a wild mouse). The species has all features of the  
1266 genus. Cells grow as straight to slightly curved rods with pointy ends, looking like short worms (ca. 1.6-2.2 0 µm in length)  
1267 when grown on YCFA or mGAM blood agar under anaerobic conditions for 2-5 days. In total, 100 CAZymes were identified in



1268 the genome, with only starch predicted to be used as carbon source. KEGG analysis identified pathways for the production  
1269 of acetate from acetyl-CoA (EC:2.3.1.8, 2.7.2.1), butyrate from butanoyl-CoA (EC:2.8.3.8), and propionate from propanoyl-  
1270 CoA (EC:2.3.1.8, 2.7.2.1). Antibiotic resistance may be conferred by the presence of tetracycline-resistant ribosomal  
1271 protection protein (ARO:0000002). The 16S rRNA gene sequence of the species was most prevalent in the mouse gut (50.8%  
1272 of 1,000 samples positive, mean rel. abund. 0.20%), followed by pig gut (10.5%), and bovine gut (6.2%). The type strain is **CLA-  
1273 AA-M16<sup>T</sup> (=DSM 112226<sup>T</sup>)**. Its G+C content of genomic DNA is 60.5 mol%. It was isolated from the filtered (0.45 µm) caecal  
1274 suspension of a wild mouse.

1275 **Description of *Weizmannia agrestimuris* sp. nov.** *Weizmannia agrestimuris* (a.gres.ti.mu'ris. L. masc. adj. *agrestis*, wild; L.  
1276 masc. or fem. n. *mus*, a mouse; N.L. gen. n. *agrestimuris*, of a wild mouse). Based on 16S rRNA gene sequence analysis, the  
1277 bacterium is considered to belong to the species *Weizmannia coagulans*, the type species of this genus (99.65% sequence  
1278 identity). The highest POCP value (81.8% to *W. coagulans*) and genome tree analysis, which placed the isolate within the  
1279 monophyletic cluster of *Weizmannia* species, confirmed the genus status. However, GTDB-Tk assigned the genome to the  
1280 species '*Weizmannia coagulans\_A*'. Moreover, the ANI and GGDC values to *W. coagulans* ATCC 7050<sup>T</sup> were 94.7% and 59.4%,  
1281 respectively, supporting the proposal to create a novel species. The isolate was found to be the same species as *Weizmannia*  
1282 *coagulans* 36D1,<sup>90</sup> with ANI and GGDC values of 98.3% and 85.3%, respectively. However, strain 36D1 has never been  
1283 described to represent a novel species. The isolate grows on WCA medium under anaerobic conditions; visible turbidity can  
1284 be observed within 3 days. Genome analysis predicted the ability to utilise arbutin, salicin, cellobiose, sucrose, trehalose, and  
1285 starch. The genes for production of the following metabolites were also detected: acetate (from acetyl-CoA; EC:2.3.1.8,  
1286 2.7.2.1), propionate (from propanoyl-CoA; EC:2.3.1.8, 2.7.2.1), L-cysteine and acetate (from sulfide and L-serine; C:2.3.1.30,  
1287 2.5.1.47), L-glutamate (from ammonia via L-glutamine; EC:6.3.1.2, 1.4.1.-), folate (from 7,8-dihydrofolate; EC:1.5.1.3), and  
1288 riboflavin (B2, from GTP; EC:3.5.4.25, 3.5.4.26, 1.1.1.193, 3.1.3.104, 4.1.99.12, 2.5.1.78, 2.5.1.9, 2.7.1.26, 2.7.7.2). In addition,  
1289 sulfate reduction to sulfide was also predicted (EC:2.7.7.4, 2.7.1.25, 1.8.4.8, 1.8.1.2). No antibiotic resistance genes were  
1290 identified. The 16S rRNA gene sequence of the species was most prevalent in the rhizosphere (20.1% of 1,000 samples  
1291 positive), followed by pig gut (12.8%). The type strain is **aMCA-6-a-A<sup>T</sup> (=DSM 106041<sup>T</sup>)**. Its G+C content of genomic DNA is  
1292 46.7 mol%, similar to *W. coagulans* (46.9 mol%). It was isolated from the caecal content of a wild mouse.

1293 **Description of *Xylanibacter caecicola* sp. nov.** *Xylanibacter caecicola* (cae.ci'co.la. L. neut. n. *caecum*, caecum; L. masc./fem.  
1294 suff. *-cola*, dweller; from L. masc./fem. n. *incola*, inhabitant, dweller; N.L. n. *caecicola*, an inhabitant of the caecum). Based  
1295 on previous analyses, 16S rRNA gene sequence similarities between members of the family *Prevotellaceae* have been shown  
1296 to be uninformative for the placement of novel isolates; this data is thus not included here.<sup>87</sup> Phylogenomic placement of the  
1297 type strain identified it as a member of the genus *Xylanibacter*, placed between *Xylanibacter rara* and *Xylanibacter oryzae*,  
1298 but forming its own branch. ANI analysis to all members of *Xylanibacter*, and the neighbouring genera (*Palleniella*, *Leyella*,  
1299 *Hoyleseella*, *Segatella*, *Hallella*, and *Prevotella*), confirmed that the type strain represents a novel species with all values being  
1300 below 90%. In the genome, 270 CAZymes were identified along with pathways for the utilisation of starch and cellulose. KEGG  
1301 analysis identified pathways for the production of acetate from acetyl-CoA (EC:2.3.1.8, 2.7.2.1), propionate from propanoyl-  
1302 CoA (EC:2.3.1.8, 2.7.2.1), L-glutamate from ammonia via L-glutamine (EC:6.3.1.2, 1.4.1.-), folate (vitamin B9) from 7,8-  
1303 dihydrofolate (EC:1.5.1.3), and riboflavin (vitamin B2) from GTP (EC:3.5.4.25, 3.5.4.26, 1.1.1.193, 3.1.3.104, 4.1.99.12,  
1304 2.5.1.78, 2.5.1.9, 2.7.1.26, 2.7.7.2). Ecological analysis suggests that the species is most prevalent within amplicon datasets  
1305 from the mouse gut (9.4%) at an average relative abundance of 1.53%. The type strain is **PCHR<sup>T</sup> (=DSM 105245<sup>T</sup>)**. Its G+C  
1306 content of genomic DNA is 46.2 mol%. It was isolated from the caecum and colon content of a SPF mouse.

1307

## 1308 Data availability

1309 The 16S rRNA gene amplicon datasets generated in this work were deposited at the NCBI under  
1310 experiment-specific Project IDs: ageing mice (PRJNA807268); wildling mice (PRJNA807849); OMM mice  
1311 (gnotobiotic facility A in Aachen, PRJNA807946; F1 generation, PRJNA807912; gnotobiotic facility B in  
1312 Hannover, PRJNA808033); cultures from filtered gut content (PRJNA812903). The near full-length 16S  
1313 rRNA gene sequences and draft genomes of the isolates were deposited at the European Nucleotide  
1314 Archive and are accessible under Project no. PRJEB50452. They can also be downloaded via the project  
1315 data repository at <https://github.com/ClavelLab/miBC>.

1316

## 1317 Acknowledgements

1318 We are grateful to: Marzena Wyszkon (Leibniz Institute DSMZ) for processing strains for long-term  
1319 conservation; Franziska Burkart, Alicia Geppert, and Anika Methner (Leibniz Institute DSMZ) for  
1320 preparation of the OMM strain mixtures; Johannes Masson, Soheila Razavi, and Theresa Streidl

1321 (University Hospital of RWTH Aachen) as well as Haiying Huang (Helmholtz Center Munich) for  
1322 contributing to strain isolation; Wolf-Dietrich Hardt (ETH Zurich) for providing *E. coli* strains; Ntana  
1323 Kousetzi (AG Clavel, University Hospital of RWTH Aachen) and Klaus Neuhaus (TU Munich) for their  
1324 help with sequencing; the DFG-funded NGS Competence Center Tübingen (INST 37/1049-1) for  
1325 genome sequencing of *E. coli* strains; Andrea Leufgen (Institute of Molecular Medicine, University  
1326 Hospital of RWTH Aachen) for support with mouse sampling and sample processing for flow cytometry;  
1327 Sigrid Kisling and Dirk Haller (TU Munich) as well as Stefan Rosshart (University of Freiburg) for  
1328 providing mouse samples. This work was performed with support by the IZKF Core Facilities  
1329 Sequencing and Cytometry (Oliver Pabst) at the University Hospital of RWTH Aachen.

1330

### 1331 **Authors contributions**

1332 BS, JO, and TC initiated the project; AA, SAVJ, TCAH, TR, MB, TS, and TC planned experiments; AA, SAVJ,  
1333 RdO, AP, MB, AvS, CE, RB, FH, EO-YW, EMB, NTo, and VC performed experiments; SAVJ, RdO, and MB  
1334 performed animal experiments; AA, SAVJ, TCAH, RdO, AP, NTr, AvS, CE, RB, NTo, and VC analysed data;  
1335 TCAH and NT performed bioinformatic analyses; AA, SAV, TCAH, TR, RdO, AP, Ntr, TS, and TC  
1336 interpreted data; AA, TCAH, TR, and BA curated data; WWN, AB, RT, H-PH, FK, BS, TS, and JO gave  
1337 access to essential material and infrastructure; AA, SAVJ, TCAH, and TC wrote the paper and created  
1338 the figures; JO and TC secured primary funding; TC coordinated the project; all authors reviewed the  
1339 manuscript and agreed with its final content.

1340

### 1341 **Competing interests**

1342 TC has ongoing scientific collaborations with Cytena GmbH and HiPP GmbH and is member of the  
1343 scientific advisory board of Savanna Ingredients GmbH.

1344

### 1345 **Funding**

1346 The work was funded by the German Research Foundation (DFG): Project-ID 403224013 (SFB 1382) to  
1347 FK and TC; Project-ID 395357507 (SFB 1371) to KN, BS, and TC; Project-ID 460129525  
1348 (NFDI4Microbiota) and Project CL481/4-1 to TC. Project HO4245/3-1 to H-PH.

1349

### 1350 **References**

- 1351 1 Quince, C., Walker, A. W., Simpson, J. T., Loman, N. J. & Segata, N. Shotgun metagenomics,  
1352 from sampling to analysis. *Nat Biotechnol* **35**, 833-844 (2017).
- 1353 2 Hitch, T. C. A. *et al.* Recent advances in culture-based gut microbiome research. *Int J Med*  
1354 *Microbiol* **311**, 151485 (2021).
- 1355 3 Thomas, A. M. & Segata, N. Multiple levels of the unknown in microbiome research. *BMC Biol*  
1356 **17**, 48 (2019).
- 1357 4 Forster, S. C. *et al.* A human gut bacterial genome and culture collection for improved  
1358 metagenomic analyses. *Nat Biotechnol* **37**, 186-192 (2019).

- 1359 5 Groussin, M. *et al.* Elevated rates of horizontal gene transfer in the industrialized human  
1360 microbiome. *Cell* **184**, 2053-2067 e2018 (2021).
- 1361 6 Lagier, J. C. *et al.* Culturing the human microbiota and culturomics. *Nat Rev Microbiol*, 540-550  
1362 (2018).
- 1363 7 Liu, C. *et al.* Enlightening the taxonomy darkness of human gut microbiomes with a cultured  
1364 biobank. *Microbiome* **9**, 119 (2021).
- 1365 8 Zou, Y. *et al.* 1,520 reference genomes from cultivated human gut bacteria enable functional  
1366 microbiome analyses. *Nat Biotechnol* **37**, 179-185 (2019).
- 1367 9 Frese, S. A. *et al.* The evolution of host specialization in the vertebrate gut symbiont  
1368 *Lactobacillus reuteri*. *PLoS Genet* **7**, e1001314 (2011).
- 1369 10 Seedorf, H. *et al.* Bacteria from diverse habitats colonize and compete in the mouse gut. *Cell*  
1370 **159**, 253-266 (2014).
- 1371 11 Youngblut, N. D. *et al.* Vertebrate host phylogeny influences gut archaeal diversity. *Nat*  
1372 *Microbiol* (2021).
- 1373 12 Lagkourdos, I. *et al.* The Mouse Intestinal Bacterial Collection (miBC) provides host-specific  
1374 insight into cultured diversity and functional potential of the gut microbiota. *Nat Microbiol* **1**,  
1375 16131 (2016).
- 1376 13 Lagkourdos, I. *et al.* Sequence and cultivation study of Muribaculaceae reveals novel species,  
1377 host preference, and functional potential of this yet undescribed family. *Microbiome* **7**, 28  
1378 (2019).
- 1379 14 Liu, C. *et al.* The Mouse Gut Microbial Biobank expands the coverage of cultured bacteria. *Nat*  
1380 *Commun* **11**, 79 (2020).
- 1381 15 Beresford-Jones, B. S. *et al.* The Mouse Gastrointestinal Bacteria Catalogue enables translation  
1382 between the mouse and human gut microbiotas via functional mapping. *Cell Host Microbe* **30**,  
1383 124-138 e128 (2022).
- 1384 16 Pryor, R. *et al.* Host-Microbe-Drug-Nutrient Screen Identifies Bacterial Effectors of Metformin  
1385 Therapy. *Cell* **178**, 1299-1312 e1229 (2019).
- 1386 17 Wilson, M. R. *et al.* The human gut bacterial genotoxin colibactin alkylates DNA. *Science* **363**  
1387 (2019).
- 1388 18 Yoo, W. *et al.* High-fat diet-induced colonocyte dysfunction escalates microbiota-derived  
1389 trimethylamine N-oxide. *Science* **373**, 813-818 (2021).
- 1390 19 Zhu, W. *et al.* Precision editing of the gut microbiota ameliorates colitis. *Nature* **553**, 208-211  
1391 (2018).
- 1392 20 Lourenco, M. *et al.* The Spatial Heterogeneity of the Gut Limits Predation and Fosters  
1393 Coexistence of Bacteria and Bacteriophages. *Cell Host Microbe* **28**, 390-401 e395 (2020).
- 1394 21 Lagkourdos, I. *et al.* IMNGS: A comprehensive open resource of processed 16S rRNA  
1395 microbial profiles for ecology and diversity studies. *Sci Rep* **6**, 33721 (2016).
- 1396 22 Rosshart, S. P. *et al.* Laboratory mice born to wild mice have natural microbiota and model  
1397 human immune responses. *Science* **365** (2019).
- 1398 23 Lesker, T. R. *et al.* An Integrated Metagenome Catalog Reveals New Insights into the Murine  
1399 Gut Microbiome. *Cell Rep* **30**, 2909-2922 e2906 (2020).
- 1400 24 Hitch, T. C. A. *et al.* Automated analysis of genomic sequences facilitates high-throughput and  
1401 comprehensive description of bacteria. *ISME Communications* **1**, 16 (2021).
- 1402 25 Robertson, B. R. *et al.* *Mucispirillum schaedleri* gen. nov., sp. nov., a spiral-shaped bacterium  
1403 colonizing the mucus layer of the gastrointestinal tract of laboratory rodents. *Int J Syst Evol*  
1404 *Microbiol* **55**, 1199-1204 (2005).

- 1405 26 Waters, J. L. & Ley, R. E. The human gut bacteria Christensenellaceae are widespread,  
1406 heritable, and associated with health. *BMC Biol* **17**, 83 (2019).
- 1407 27 Roy, U. *et al.* Distinct Microbial Communities Trigger Colitis Development upon Intestinal  
1408 Barrier Damage via Innate or Adaptive Immune Cells. *Cell Rep* **21**, 994-1008 (2017).
- 1409 28 Kumar, N., Hitch, T. C. A., Haller, D., Lagkouvardos, I. & Clavel, T. MiMiC: a bioinformatic  
1410 approach for generation of synthetic communities from metagenomes. *Microb Biotechnol* **14**,  
1411 1757-1770 (2021).
- 1412 29 Dou, X., Gao, N., Yan, D. & Shan, A. Sodium Butyrate Alleviates Mouse Colitis by Regulating Gut  
1413 Microbiota Dysbiosis. *Animals (Basel)* **10** (2020).
- 1414 30 Tong, L. C. *et al.* Propionate Ameliorates Dextran Sodium Sulfate-Induced Colitis by Improving  
1415 Intestinal Barrier Function and Reducing Inflammation and Oxidative Stress. *Front Pharmacol*  
1416 **7**, 253 (2016).
- 1417 31 Brugiroux, S. *et al.* Genome-guided design of a defined mouse microbiota that confers  
1418 colonization resistance against *Salmonella enterica* serovar Typhimurium. *Nat Microbiol* **2**,  
1419 16215 (2016).
- 1420 32 Darnaud, M. *et al.* A standardized gnotobiotic mouse model harboring a minimal 15-member  
1421 mouse gut microbiota recapitulates SOPF/SPF phenotypes. *Nat Commun* **12**, 6686 (2021).
- 1422 33 Wymore Brand, M. *et al.* The Altered Schaedler Flora: Continued Applications of a Defined  
1423 Murine Microbial Community. *ILAR J* **56**, 169-178 (2015).
- 1424 34 Herp, S. *et al.* *Mucispirillum schaedleri* Antagonizes *Salmonella* Virulence to Protect Mice  
1425 against Colitis. *Cell Host Microbe* **25**, 681-694 e688 (2019).
- 1426 35 Marion, S. *et al.* Biogeography of microbial bile acid transformations along the murine gut. *J*  
1427 *Lipid Res* **61**, 1450-1463 (2020).
- 1428 36 Nowosad, C. R. *et al.* Tunable dynamics of B cell selection in gut germinal centres. *Nature* **588**,  
1429 321-326 (2020).
- 1430 37 Streidl, T. *et al.* The gut bacterium *Extibacter muris* produces secondary bile acids and  
1431 influences liver physiology in gnotobiotic mice. *Gut Microbes* **13**, 1-21 (2021).
- 1432 38 Yilmaz, B. *et al.* Long-term evolution and short-term adaptation of microbiota strains and sub-  
1433 strains in mice. *Cell Host Microbe* **29**, 650-663 e659 (2021).
- 1434 39 Zund, M. *et al.* High throughput sequencing provides exact genomic locations of inducible  
1435 prophages and accurate phage-to-host ratios in gut microbial strains. *Microbiome* **9**, 77 (2021).
- 1436 40 Loy, A. *et al.* Lifestyle and Horizontal Gene Transfer-Mediated Evolution of *Mucispirillum*  
1437 *schaedleri*, a Core Member of the Murine Gut Microbiota. *mSystems* **2** (2017).
- 1438 41 Eberl, C. *et al.* Reproducible Colonization of Germ-Free Mice With the Oligo-Mouse-Microbiota  
1439 in Different Animal Facilities. *Front Microbiol* **10**, 2999 (2019).
- 1440 42 Herp, S., Durai Raj, A. C., Salvado Silva, M., Woelfel, S. & Stecher, B. The human symbiont  
1441 *Mucispirillum schaedleri*: causality in health and disease. *Med Microbiol Immunol* **210**, 173-  
1442 179 (2021).
- 1443 43 Gehrig, J. L. *et al.* Effects of microbiota-directed foods in gnotobiotic animals and  
1444 undernourished children. *Science* **365** (2019).
- 1445 44 Schwarzer, M. *et al.* *Lactobacillus plantarum* strain maintains growth of infant mice during  
1446 chronic undernutrition. *Science* **351**, 854-857 (2016).
- 1447 45 Zheng, J. *et al.* A taxonomic note on the genus *Lactobacillus*: Description of 23 novel genera,  
1448 emended description of the genus *Lactobacillus* Beijerinck 1901, and union of *Lactobacillaceae*  
1449 and *Leuconostocaceae*. *Int J Syst Evol Microbiol* **70**, 2782-2858 (2020).

- 1450 46 Lecuyer, E. *et al.* Segmented filamentous bacterium uses secondary and tertiary lymphoid  
1451 tissues to induce gut IgA and specific T helper 17 cell responses. *Immunity* **40**, 608-620 (2014).
- 1452 47 Pabst, O., Cerovic, V. & Hornef, M. Secretory IgA in the Coordination of Establishment and  
1453 Maintenance of the Microbiota. *Trends Immunol* **37**, 287-296 (2016).
- 1454 48 Kabbert, J. *et al.* High microbiota reactivity of adult human intestinal IgA requires somatic  
1455 mutations. *J Exp Med* **217** (2020).
- 1456 49 Campbell, C. *et al.* Bacterial metabolism of bile acids promotes generation of peripheral  
1457 regulatory T cells. *Nature* **581**, 475-479 (2020).
- 1458 50 Hang, S. *et al.* Bile acid metabolites control TH17 and Treg cell differentiation. *Nature* **576**, 143-  
1459 148 (2019).
- 1460 51 Song, X. *et al.* Microbial bile acid metabolites modulate gut RORgamma(+) regulatory T cell  
1461 homeostasis. *Nature* **577**, 410-415 (2020).
- 1462 52 Ramanan, D. *et al.* An Immunologic Mode of Multigenerational Transmission Governs a Gut  
1463 Treg Setpoint. *Cell* **181**, 1276-1290 e1213 (2020).
- 1464 53 Geuking, M. B. & Burkhard, R. Microbial modulation of intestinal T helper cell responses and  
1465 implications for disease and therapy. *Mucosal Immunol* **13**, 855-866 (2020).
- 1466 54 Ivanov, I. *et al.* Induction of intestinal Th17 cells by segmented filamentous bacteria. *Cell* **139**,  
1467 485-498 (2009).
- 1468 55 Forster, S. C. *et al.* Novel gut pathobionts confound results in a widely used mouse model of  
1469 human inflammatory disease. *bioRxiv* (2022).
- 1470 56 Rautio, M. *et al.* Reclassification of *Bacteroides putredinis* (Weinberg *et al.*, 1937) in a new  
1471 genus *Alistipes* gen. nov., as *Alistipes putredinis* comb. nov., and description of *Alistipes*  
1472 *fingoldii* sp. nov., from human sources. *Syst Appl Microbiol* **26**, 182-188 (2003).
- 1473 57 Aranda-Diaz, A. *et al.* Establishment and characterization of stable, diverse, fecal-derived in  
1474 vitro microbial communities that model the intestinal microbiota. *Cell Host Microbe* (2022).
- 1475 58 Afrizal, A. *et al.* Anaerobic single-cell dispensing facilitates the cultivation of human gut  
1476 bacteria. *Environ Microbiol* (2022).
- 1477 59 Cheng, A. G. *et al.* In vivo augmentation of a complex gut bacterial community. (2022).
- 1478 60 Greuter, D., Loy, A., Horn, M. & Rattei, T. probeBase--an online resource for rRNA-targeted  
1479 oligonucleotide probes and primers: new features 2016. *Nucleic Acids Res* **44**, D586-589  
1480 (2016).
- 1481 61 Yoon, S. H. *et al.* Introducing EzBioCloud: a taxonomically united database of 16S rRNA gene  
1482 sequences and whole-genome assemblies. *Int J Syst Evol Microbiol* **67**, 1613-1617 (2017).
- 1483 62 Stackebrandt, E., Mondotte, J. A., Fazio, L. L. & Jetten, M. Authors need to be prudent when  
1484 assigning names to microbial isolates. *Antonie Van Leeuwenhoek* **115**, 1-5 (2022).
- 1485 63 Lu, Y., Welsh, J. P., Chan, W. & Swartz, J. R. Escherichia coli-based cell free production of  
1486 flagellin and ordered flagellin display on virus-like particles. *Biotechnol Bioeng* **110**, 2073-2085  
1487 (2013).
- 1488 64 Godon, J. J., Zumstein, E., Dabert, P., Habouzit, F. & Moletta, R. Molecular microbial diversity  
1489 of an anaerobic digester as determined by small-subunit rDNA sequence analysis. *Appl Environ*  
1490 *Microbiol* **63**, 2802-2813 (1997).
- 1491 65 Bolger, A. M., Lohse, M. & Usadel, B. Trimmomatic: a flexible trimmer for Illumina sequence  
1492 data. *Bioinformatics* **30**, 2114-2120 (2014).
- 1493 66 Bushnell, B. *BBMap: A Fast, Accurate, Splice-Aware Aligner*,  
1494 <<https://www.osti.gov/servlets/purl/1241166>> (2014).

- 1495 67 Bankevich, A. *et al.* SPAdes: a new genome assembly algorithm and its applications to single-  
1496 cell sequencing. *J Comput Biol* **19**, 455-477 (2012).
- 1497 68 Parks, D. H., Imelfort, M., Skennerton, C. T., Hugenholtz, P. & Tyson, G. W. CheckM: assessing  
1498 the quality of microbial genomes recovered from isolates, single cells, and metagenomes.  
1499 *Genome Res* **25**, 1043-1055 (2015).
- 1500 69 Jain, C., Rodriguez, R. L., Phillippy, A. M., Konstantinidis, K. T. & Aluru, S. High throughput ANI  
1501 analysis of 90K prokaryotic genomes reveals clear species boundaries. *Nat Commun* **9**, 5114  
1502 (2018).
- 1503 70 Maehler, M. *et al.* FELASA recommendations for the health monitoring of mouse, rat, hamster,  
1504 guinea pig and rabbit colonies in breeding and experimental units. *Lab Anim* **48**, 178-192  
1505 (2014).
- 1506 71 Basic, M. *et al.* Monitoring and contamination incidence of gnotobiotic experiments performed  
1507 in microisolator cages. *Int J Med Microbiol* **311**, 151482 (2021).
- 1508 72 Gremse, F. *et al.* Imanytics Preclinical: Interactive Analysis of Biomedical Volume Data.  
1509 *Theranostics* **6**, 328-341 (2016).
- 1510 73 Edgar, R. C. UPARSE: highly accurate OTU sequences from microbial amplicon reads. *Nat*  
1511 *Methods* **10**, 996-998 (2013).
- 1512 74 Reitmeier, S. *et al.* Handling of spurious sequences affects the outcome of high-throughput  
1513 16S rRNA gene amplicon profiling. *ISME Communications* **1**, 31 (2021).
- 1514 75 Buchfink, B., Xie, C. & Huson, D. H. Fast and sensitive protein alignment using DIAMOND. *Nat*  
1515 *Methods* **12**, 59-60 (2015).
- 1516 76 Li, D., Liu, C. M., Luo, R., Sadakane, K. & Lam, T. W. MEGAHIT: an ultra-fast single-node solution  
1517 for large and complex metagenomics assembly via succinct de Bruijn graph. *Bioinformatics* **31**,  
1518 1674-1676 (2015).
- 1519 77 Hyatt, D. *et al.* Prodigal: prokaryotic gene recognition and translation initiation site  
1520 identification. *BMC Bioinformatics* **11**, 119 (2010).
- 1521 78 Mistry, J. *et al.* Pfam: The protein families database in 2021. *Nucleic Acids Res* **49**, D412-D419  
1522 (2021).
- 1523 79 Finn, R. D., Clements, J. & Eddy, S. R. HMMER web server: interactive sequence similarity  
1524 searching. *Nucleic Acids Res* **39**, W29-37 (2011).
- 1525 80 Parte, A. C., Sarda Carbasse, J., Meier-Kolthoff, J. P., Reimer, L. C. & Goker, M. List of  
1526 Prokaryotic names with Standing in Nomenclature (LPSN) moves to the DSMZ. *Int J Syst Evol*  
1527 *Microbiol* (2020).
- 1528 81 Yarza, P. *et al.* Uniting the classification of cultured and uncultured bacteria and archaea using  
1529 16S rRNA gene sequences. *Nat Rev Microbiol* **12**, 635-645 (2014).
- 1530 82 Meier-Kolthoff, J. P., Klenk, H. P. & Goker, M. Taxonomic use of DNA G+C content and DNA-  
1531 DNA hybridization in the genomic age. *Int J Syst Evol Microbiol* **64**, 352-356 (2014).
- 1532 83 Qin, Q. L. *et al.* A proposed genus boundary for the prokaryotes based on genomic insights. *J*  
1533 *Bacteriol* **196**, 2210-2215 (2014).
- 1534 84 Meier-Kolthoff, J. P., Carbasse, J. S., Peinado-Olarte, R. L. & Goker, M. TYGS and LPSN: a  
1535 database tandem for fast and reliable genome-based classification and nomenclature of  
1536 prokaryotes. *Nucleic Acids Res* **50**, D801-D807 (2022).
- 1537 85 Sakamoto, M., Iino, T., Yuki, M. & Ohkuma, M. *Lawsonibacter asaccharolyticus* gen. nov., sp.  
1538 nov., a butyrate-producing bacterium isolated from human faeces. *Int J Syst Evol Microbiol* **68**,  
1539 2074-2081 (2018).

- 1540 86 Afrizal, A. *et al.* Anaerobic single-cell dispensing facilitates the cultivation of human gut  
1541 bacteria. *Environ Microbiol* (2022).
- 1542 87 Hitch, T. C. A. *et al.* A taxonomic note on the genus *Prevotella*: Description of four novel genera  
1543 and emended description of the genera *Hallella* and *Xylanibacter*. *Syst Appl Microbiol* (2022).
- 1544 88 Bessis, S., Ndongo, S., Lagier, J. C., Fournier, P. E. & Raoult, D. "Emergencia timonensis," a new  
1545 bacterium isolated from the stool of a healthy patient. *New Microbes New Infect* **12**, 73-75  
1546 (2016).
- 1547 89 Lund, L. C. *et al.* Draft Genome Sequence of "Terrisporobacter othiniensis" Isolated from a  
1548 Blood Culture from a Human Patient. *Genome Announc* **3** (2015).
- 1549 90 Rhee, M. S. *et al.* Complete Genome Sequence of a thermotolerant sporogenic lactic acid  
1550 bacterium, *Bacillus coagulans* strain 36D1. *Stand Genomic Sci* **5**, 331-340 (2011).
- 1551 91 Asnicar, F. *et al.* Microbiome connections with host metabolism and habitual diet from 1,098  
1552 deeply phenotyped individuals. *Nat Med* **27**, 321-332 (2021).
- 1553 92 Letunic, I. & Bork, P. Interactive Tree Of Life (iTOL) v5: an online tool for phylogenetic tree  
1554 display and annotation. *Nucleic Acids Res* **49**, W293-W296 (2021).
- 1555 93 Parks, D. H. *et al.* A complete domain-to-species taxonomy for Bacteria and Archaea. *Nat*  
1556 *Biotechnol* **38**, 1079-1086 (2020).
- 1557 94 Stamatakis, A. RAxML version 8: a tool for phylogenetic analysis and post-analysis of large  
1558 phylogenies. *Bioinformatics* **30**, 1312-1313 (2014).
- 1559 95 Gundogdu, A., Bolkvadze, D. & Kilic, H. In vitro Effectiveness of Commercial Bacteriophage  
1560 Cocktails on Diverse Extended-Spectrum Beta-Lactamase Producing *Escherichia coli* Strains.  
1561 *Front Microbiol* **7**, 1761 (2016).

1562

## 1563 **Figure legends**

1564 **Figure 1:** Phylogenomic tree of the mouse intestinal bacterial collection. The genomes used are listed  
1565 in **Supplementary Table S1**. The tree was constructed using PhyloPhlAn v3.0.60<sup>91</sup> and visualized and  
1566 further processed in iTOL.<sup>92</sup> For contextualization, isolates that were part of the first version of miBC<sup>12</sup>  
1567 are written in grey. Colours indicate phyla. Strains that are the first cultured members of novel taxa  
1568 are indicated with orange dots surrounding their names. For all new isolates, the grey boxes and blue  
1569 bars in the outer rings indicate the prevalence and mean relative abundance, respectively, of the  
1570 corresponding 16S rRNA gene sequence in 11,485 amplicon datasets from mice.<sup>21</sup>

1571

1572 **Figure 2:** Comparison to other published collections of isolates and determination of cultured fractions.  
1573 **(A)** Shared and unique diversity within miBC and mGMB<sup>14</sup> based on 16S rRNA genes. Sequences with  
1574 a pairwise identity >98.7% were considered to represent the same species. MGBC<sup>15</sup> does not provide  
1575 full-length 16S rRNA gene sequences and was not included in this analysis. **(B)** Shared and unique  
1576 diversity within miBC, mGM, and MGBC<sup>15</sup> based on genomes. ANI values >95% were used to define  
1577 genomes representing the same species. **(C-F)** Cultured fractions (% of captured molecular species at  
1578 the conservative threshold of 97 % sequence identity due to sequence size) of 16S rRNA gene amplicon  
1579 data from mouse gut samples: **(C)** in the IMNGS database (n = 11,485),<sup>21</sup> or **(D-F)** generated in the  
1580 present study, including **(D)** caecum from wildling mice, **(E)** caecum from SPF mice in our own animal  
1581 facility in Aachen (1), **(F)** various gut regions and different ages in two independent mouse facilities (2,  
1582 TU Munich; 3, Medical School Hannover). Dots are colored as follows: pink, miBC; blue, mGMB; violet,

1583 mGMB plus unique diversity within miBC. **(G)** The percentage of proteins within the iMGMC gene  
1584 catalog assignable to genomes within each collection was determined sequentially from miBC, mGMB  
1585 and MGBC.

1586

1587 **Figure 3:** Diversity of small-sized bacteria in the mouse gut. **(A)** Phylogenomic tree of bacteria within  
1588 the order *Eubacteriales*. The tree was constructed as in Figure 1. For clear visualisation, branches were  
1589 collapsed whenever appropriate; in such cases, the number of species represented by the triangles are  
1590 written in brackets after the corresponding family names. The genomes from isolates obtained in the  
1591 present study (bold letters) are accessible via the project repository (see Data Availability section).  
1592 Metagenome-assembled genomes were obtained from GTDB<sup>93</sup>; they are shown with their  
1593 abbreviation from the database and corresponding accession number in brackets. **(B)** Scanning  
1594 electron micrograph of strain CLA-AA-M08, for which the name *Pumilibacter intestinalis* within the  
1595 novel family *Pumilibacteraceae* is proposed. Sample preparation is described in the methods section.  
1596 **(C)** Phylogenetic tree based on the 16S rRNA gene amplicon sequences of dominant (>1 % relative  
1597 abundance) operational taxonomic units (OTUs) obtained after culturing filtrates of mouse gut  
1598 content. The OTU IDs were determined using EzBioCloud<sup>61</sup> and are labelled using the closest relative  
1599 with a valid name; the corresponding sequence identity is in brackets. Bold letters indicate OTUs  
1600 considered to represent novel taxa at the conservative threshold of <97 % identity due to amplicons.  
1601 Orange stars indicate the novel taxa first cultured and described in the present study. Blue letters  
1602 indicate taxa exclusively found in the cultures from mouse gut filtrates and not in any other samples  
1603 (original gut content or cultures thereof without pre-processing by filtration). **(D)** Presence of  
1604 dominant OTUs (>1 % relative abundance) across the different types of samples and cultures. See  
1605 methods section for detailed information. Three mouse caecal samples were cultured after filtration  
1606 (F) or without (NF) in three different media (AAM, mGAMB, YCFA) in triplicates. The 16S rRNA gene  
1607 amplicon profiles in these cultures were compared to that of the original samples (O). The grey  
1608 gradient in these original samples indicate relative abundances as follows (from dark grey to white):  
1609 >10%, 1-5%, 0.1-1%, <0.1%. Across the samples and culture media in this map, bars indicate the  
1610 number of triplicate cultures positive for the corresponding OTU at >1 % relative abundance. Only  
1611 those OTUs detected in at least one culture replicate across the entire set of samples are shown in this  
1612 map. The complete dataset can be found in **Supplementary Table S2**. The bars in dark blue indicated  
1613 OTUs that could be cultured from gut filtrates. These OTUs are numbered as in panel C, with dark blue  
1614 numbers indicating those found exclusively in cultures from gut filtrates; those in grey letters were  
1615 also found in cultures from unfiltered samples.

1616

1617 **Figure 4:** Modular design of synthetic communities (SYNs) to influence the severity of DSS-induced  
1618 colitis in gnotobiotic mice. **(A)** Functional diversity of the original samples and the predicted SYNs as  
1619 determined by multi-dimensional plotting of Jaccard distances based on binary protein family vectors  
1620 calculated from shotgun metagenomic data. **(B)** List of bacterial strains included in the two SYNs (red,  
1621 sensitive to colitis; blue, resistant). The two strains written in black letters were selected in both cases.  
1622 The bars indicate how often a strain was selected within sample-specific SYNs in each group of mice  
1623 (sensitive Vs. resistant). **(C)** Number of shared and unique Pfams between the two categories of SYNs.  
1624 **(D)** Pfam-based functional coverage of the input metagenomic samples by the two SYNs.

1625



1626 **Figure 5:** Colonization profiles in gnotobiotic mice inoculated with the original version of Oligo-Mouse  
1627 Microbiota (OMM12) and its extended version OMM19.1. Detailed information on the strains added  
1628 to the original OMM12 model is given in **Supplementary Figure S3**. These bacteria are written in bold  
1629 letters below the x-axis. The number of mice included in each group are written in the figure **(A)**  
1630 Bacterial composition in different gut regions in gnotobiotic facility A (RWTH Aachen) as obtained by  
1631 high-throughput 16S rRNA gene amplicon sequencing. Samples from the caecum were also analysed  
1632 by qPCR; these data can be seen in **Supplementary Figure S4**. All the bacteria detected in any of the  
1633 experiments are consistently shown in the same order in all figure panels. For the sake of clarity,  
1634 bacteria occurring at a relative abundance <1 % are shown in separate graphs and the y-axes have  
1635 been optimized for visualisation of the values (right panels). Data in the caecum of mice in Facility A  
1636 was used as a reference point in all figure panels (OMM12, blue bars; OMM19.1, violet bars. All values  
1637 are shown as mean  $\pm$  standard deviations. The total numbers of mice analysed in each experiment are  
1638 indicated in brackets in the corresponding colour code legend. The numbers of mice positive for a  
1639 species are shown in grey above the corresponding plot whenever inferior to the total number of mice.  
1640 Abbreviations: SI, small intestine; Cae, caecum; Co, colon. **(B)** Bacterial composition in the caecum of  
1641 mice from the F1 generation (Facility A). Detailed description as in A. **(C)** Bacterial composition in the  
1642 caecum of mice from a second gnotobiotic facility (Facility B, Medical School Hannover). Detailed  
1643 description as in A. P-values: \* <0.05, \*\* <0.01, \*\*\* <0.001 (Mann-Whitney U-test; OMM12 vs.  
1644 OMM19.1).

1645  
1646 **Figure 6:** Differential effects of OMMs on the mouse physiology. Corresponding colonization profiles  
1647 are shown in Fig. 4a. **(A)** Body and caecum weight measured at culling. The total number of mice in  
1648 each group was: GF, n = 17; OMM12, n = 22; OMM19.1, n = 15; SPF, n = 23). **(B)** Body imaging data  
1649 obtained as described in the method section (GF, n = 12; OMM12, n = 15; OMM19.1, n = 9; SPF, n =  
1650 15). **(C)** Immune phenotyping by flow cytometry. All leukocytes were initially gated as live CD45+ cells.  
1651 CD4+ T cells were identified as TCR $\beta$ + CD4+ and further subdivided into ROR $\gamma$ t+ FoxP3- (Th17), FoxP3+  
1652 (Treg), and FoxP3+ ROR $\gamma$ t+ subsets, as indicated. IgA+ plasma cells were identified as IgA+ B220- Ly6c+.  
1653 The parent gate is indicated in the individual graphs. Other data can be seen in **Supplementary Fig. S5**.  
1654 Different letters indicate values that are statistically significant between groups (Kruskal-Wallis test  
1655 followed by Mann-Whitney U-test for pairwise comparisons). Numbers of mice were: (i) small intestine  
1656 (SI) and colon (Co); GF, n = 11; OMM12, n = 9; OMM19.1, n = 10; SPF, n = 10; (ii) mesenteric lymph  
1657 nodes (MLNs); GF, n = 10; OMM12, n = 9; OMM19.1, n = 9; SPF, n = 9; (iii) Peyer's patches (PP); GF, n  
1658 = 8; OMM12, n = 9; OMM19.1, n = 8; SPF, n = 16).

1659  
1660 **Supplementary Figure S1:** Phylogenomic diversity and comparative features of *E. coli* strains. **(A)**  
1661 Genomes of the 21 *E. coli* strains in miBC (bold letters) and those from reference strains (grey arrows)  
1662 and species of neighbouring genera were used for protein-coding gene prediction using prodigal  
1663 (v2.6.3)<sup>77</sup> and subsequent tree calculation using PhyloPhlAn (v3.0.60)<sup>91</sup> based on 400 universal marker  
1664 genes at low diversity scale using RaxML (v8.2.12).<sup>94</sup> The tree was visualized in iTOL (v6.5),<sup>92</sup> with the  
1665 scale bar depicting the average number of amino acid substitutions per site. It was rooted using the  
1666 type strain of *Klebsiella aerogenes*. Genome assemblies of the miBC strains are accessible via ENA  
1667 under project ID PRJEB50452. For other strains, high-quality genomes were retrieved from GTDB  
1668 (Release 06-RS202)<sup>93</sup> or from the ATCC (American Type Culture Collection) website, whenever  
1669 accession numbers are not given in brackets. All genomes were controlled for quality using checkM

1670 (v1.0.12).<sup>68</sup> **(B)** Phenotypic traits of all *E. coli* isolates (bold letters). Individual strains were tested for  
1671 the presence of flagella in two manners (see methods): (i) transmission electron microscopy after  
1672 negative staining (see example micrographs at the bottom of the figure); (ii) using a Flagellin Bioactivity  
1673 Assay with HEK-Blue<sup>TM</sup>-hTLR5 cells. Sensitivity to phage infection was tested using spot assays and a  
1674 variety of lytic phages (see methods): (i) phages T4, T7, Qbeta, and MS2 (blue), for which the reference  
1675 *E. coli* strains ATCC 11303 and ATCC 23631 served as positive controls; (ii) three phages newly isolated  
1676 from sewage water (grey);<sup>20</sup> (iii) therapeutic phage cocktails obtained from the Eliava Phage Therapy  
1677 Center, Tbilisi, Georgia (bluish green).<sup>95</sup> The ability to ferment lactose was tested using EnteroPluri-  
1678 Test (Liofilchem®). For all readouts, filled circles indicate positive reactions (*i.e.*, presence of flagella,  
1679 sensitivity to phages, lactose fermentation). For the HEK-cell assays, the colour gradient (light to dark)  
1680 indicates the intensity of TLR5 induction (low to strong).

1681  
1682 **Supplementary Figure S2:** Faecal microbiota of mice at different ages. **(A)** Multidimensional plot of  
1683 generalized UniFrac distances (*beta*-diversity) coloured according to animal facilities and gut locations  
1684 (this colour code was consistently used in all figure panels). **(B)** *Beta*-diversity throughout sampling  
1685 time points for each facility and gut location pair. Respective control mice (culled at the age of 10  
1686 weeks at each the earliest and latest sampling time point) are shown in grey (light grey, earliest time  
1687 point; dark grey, latest time point). Plots per gut location were scaled to the same distance allowing  
1688 for direct comparison. **(C)** Richness in samples per mouse group as in panel b. **(D)** Heatmap of the  
1689 prevalence and relative abundance of significant phyla, families and phylotypes identified to display  
1690 time-dependent changes. The color gradient of relative abundances (from low, light grey, to high, dark  
1691 grey) was scaled independently for each row (min. and max. relative abundance values are given in  
1692 scare brackets next to the taxon name). Samples in which the specific taxon was not detected appear  
1693 in white. Boxes indicate significant changes in the corresponding taxa and time point, the colour  
1694 indicating the direction of changes overtime (red, decrease; blue, increase). Phylotypes were  
1695 annotated using EZBioCloud<sup>61</sup> with the closest relative with a valid name stated along with the  
1696 corresponding percentage sequence identity in brackets.

1697  
1698 **Supplementary Figure S3:** Diversity of the strains included in Oligo-Mouse microbiota models (OMM12  
1699 and OligOMM19.1). The phylogenomic tree, the occurrence of each strain in mouse gut samples, and  
1700 their number of CAZymes were determined using Protologger. Branches are coloured according to  
1701 phyla: Deferribacteres, pink; Bacteroidetes, blue; Verrucomicrobia, violet; Proteobacteria, orange;  
1702 Actinobacteria, green; Firmicutes, ochre. The strains included in OMM12 are written in black and red  
1703 letters. The latter two species (*Acutalibacter muris* and *Bifidobacterium animalis*) showed unstable  
1704 colonization of gnotobiotic mice in previous studies<sup>31,41</sup> and were excluded from OMM19.1. Instead,  
1705 the nine strains added to create this model are written in brown, bold letters.

1706  
1707 **Supplementary Figure S4:** qPCR analysis of caecal content from OMM mice in facility A (Aachen). The  
1708 samples were analysed as described in the methods. The number of mice in each group is indicated in  
1709 the figure.

1710  
1711 **Supplementary Figure S5:** Detailed immune phenotyping of intestinal lamina propria (LP) (SI, small  
1712 intestine; Co, colon) and gut associated lymphoid tissues (MLNs, mesenteric lymph nodes; PPs, Peyer's

1713 patches) in OMM and control mice by flow cytometry. All leukocytes were initially gated as live CD45+  
1714 cells. **(A)** Myeloid cell populations were pre-gated as CD11b+ and individually identified as CD64+  
1715 Ly6C+ MHCII- monocytes, CD64+ Ly6C- macrophages, SSC<sup>hi</sup> Ly6G+ neutrophils and SSC<sup>hi</sup> Ly6G-  
1716 eosinophils. **(B)** Dendritic cells (DCs) were identified as CD11c+ MHCII+ CD64- B220- cells. **(C-D)** T cells  
1717 were identified as TCRβ+ and subdivided based on the expression of CD4 **(C)** and CD8 **(D)**. B cells **(E)**  
1718 were gated as B220+ MHCII+ in the SI, colon and MLNs and CD19+ cells in the PPs. All frequencies are  
1719 expressed as a percentage of live CD45+ cells. N = 9-11 mice per colonization group. Different letters  
1720 indicate values that are statistically significant between groups (Kruskall-Wallis test followed by Mann-  
1721 Whitney U-test for pairwise comparisons). Numbers of mice were: (i) small intestine (SI) and colon  
1722 (Co); GF, n = 11; OMM12, n = 9; OMM19.1, n = 10; SPF, n = 10; (ii) mesenteric lymph nodes (MLNs);  
1723 GF, n = 10; OMM12, n = 9; OMM19.1, n = 9; SPF, n = 9; (iii) Peyer's patches (PP); GF, n = 8; OMM12, n  
1724 = 9; OMM19.1, n = 8; SPF, n = 15).

1725

1726 **Supplementary Table S1:** Metadata of all strains included in miBC ([www.dsmz.de/miBC](http://www.dsmz.de/miBC)).

1727

1728 **Supplementary Table S2:** Formatted amplicon sequencing data from the culture experiments with  
1729 filtered (0.45 μm) mouse caecal slurries to obtain small-sized bacteria.



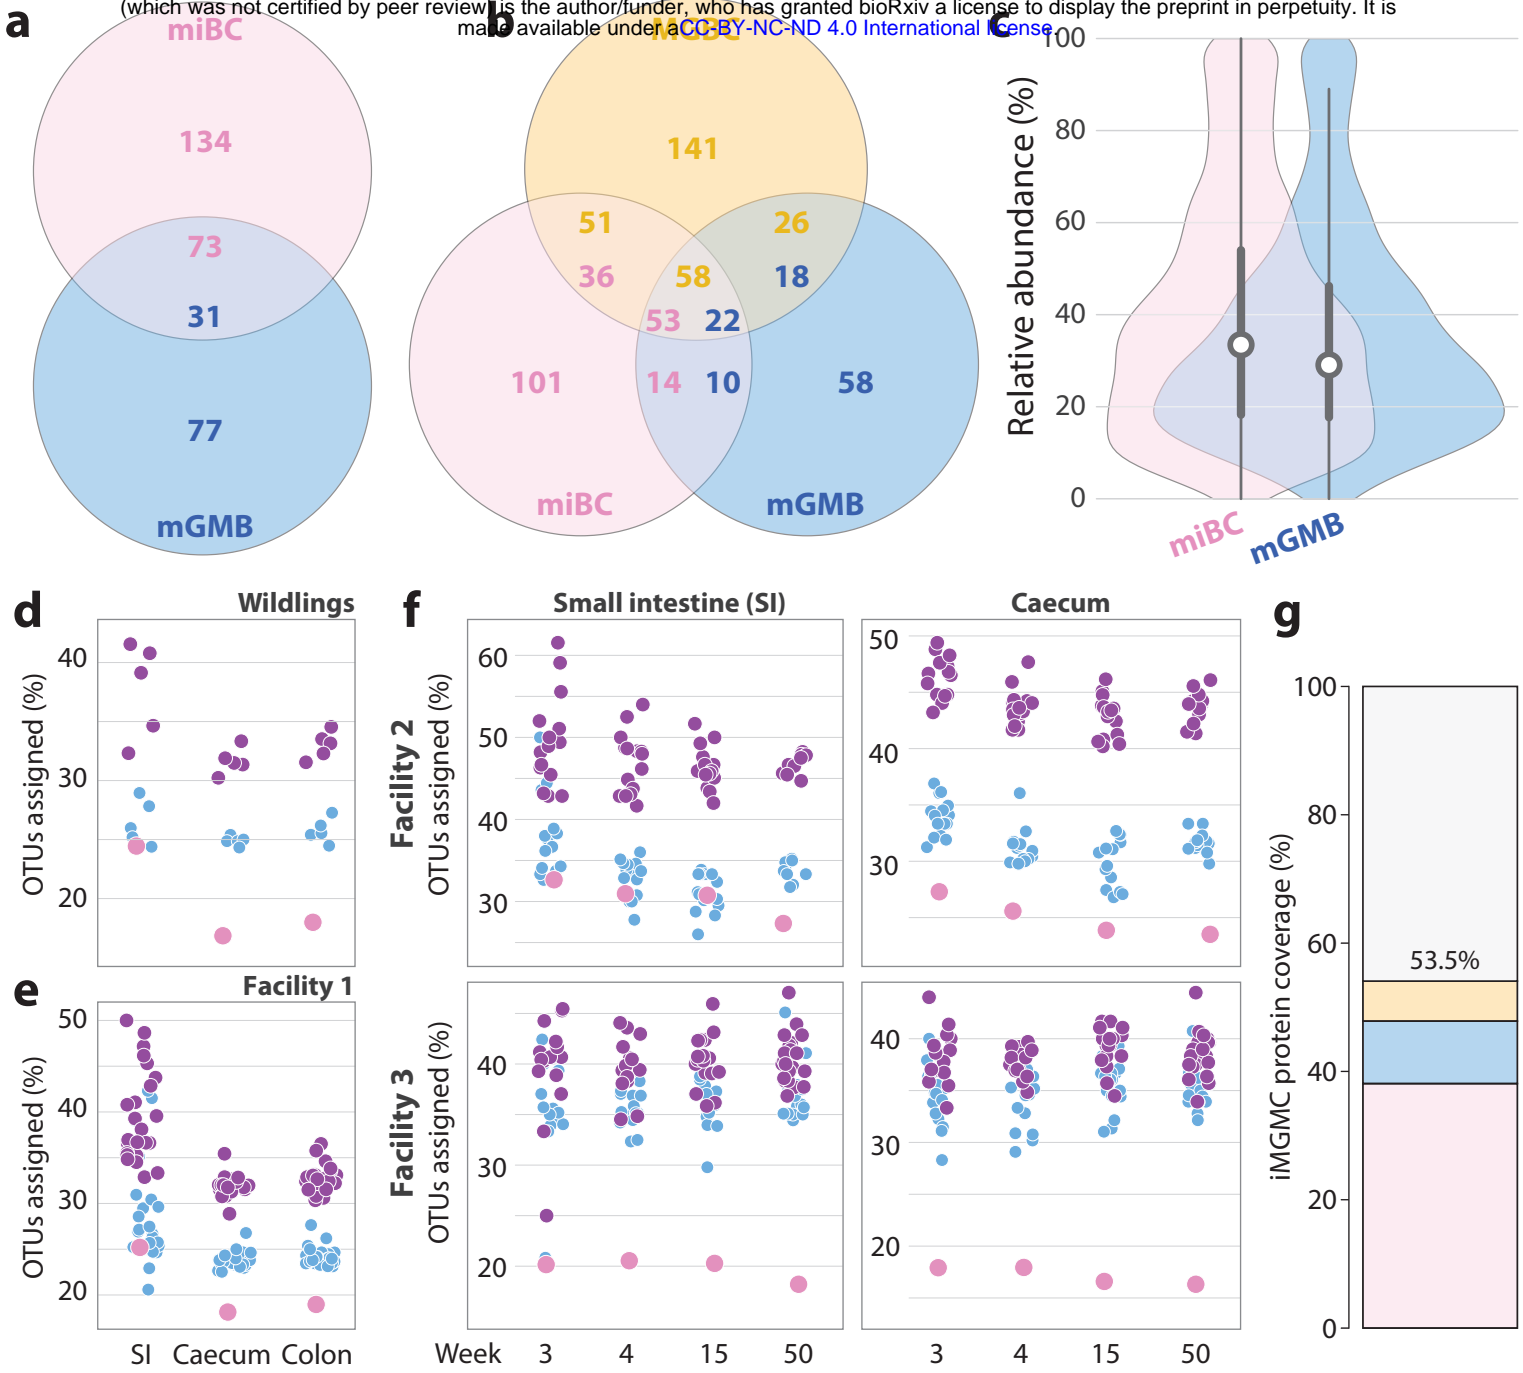

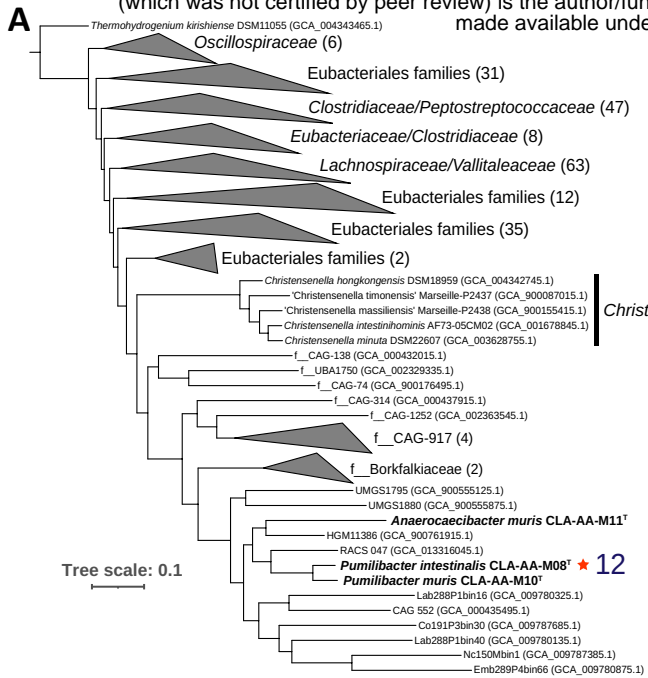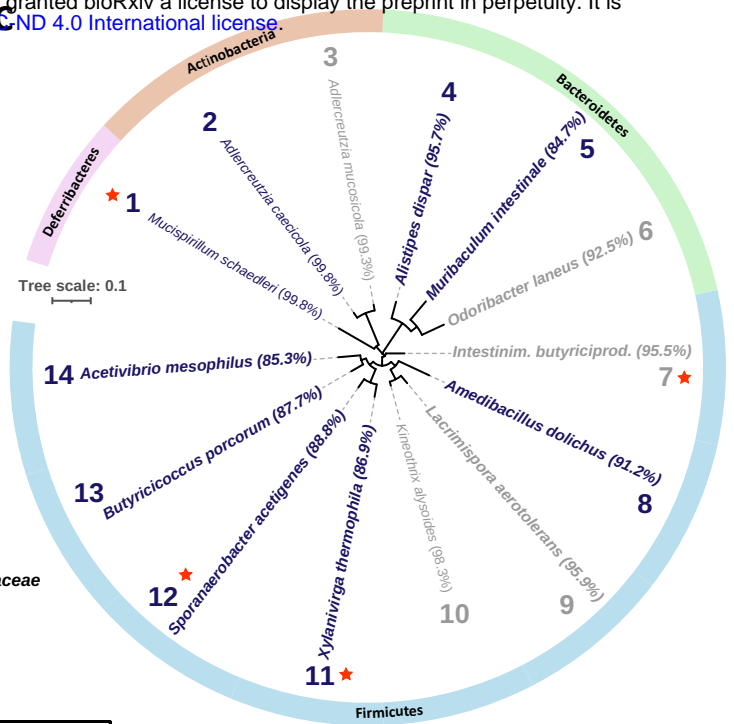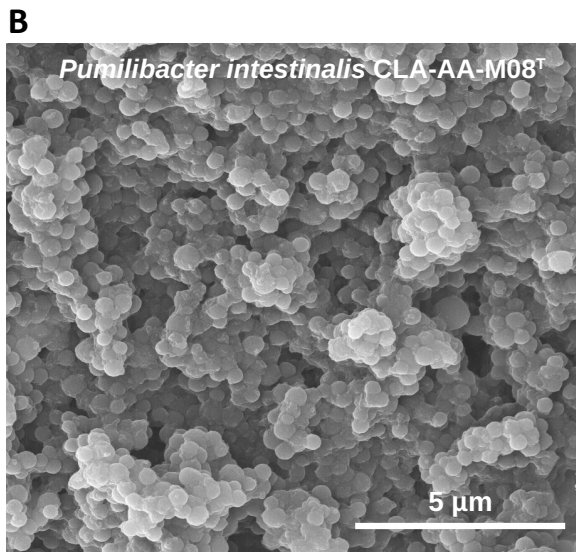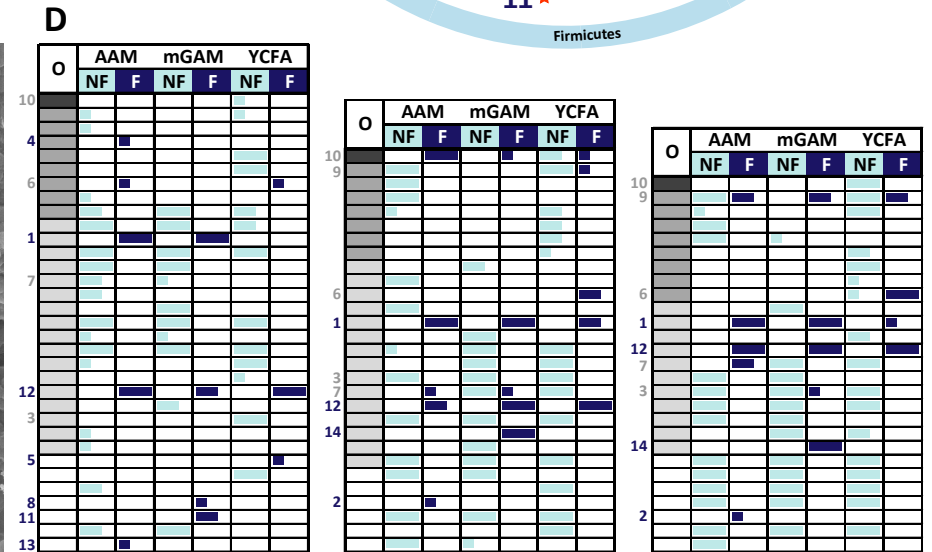

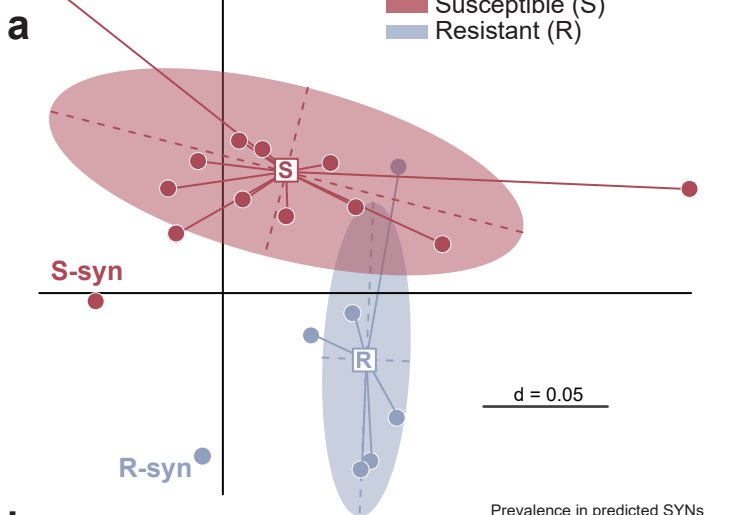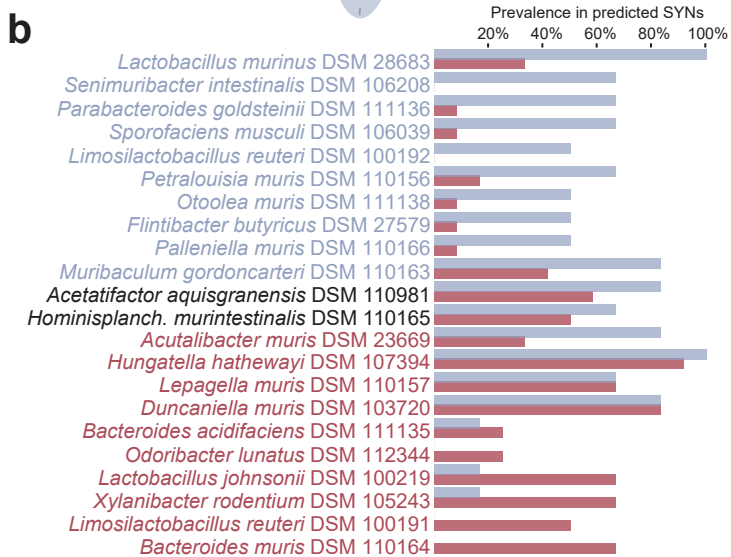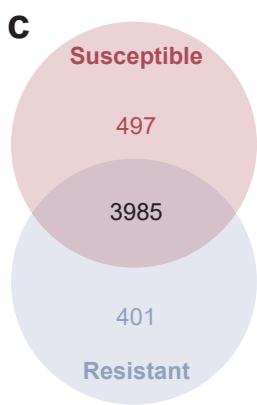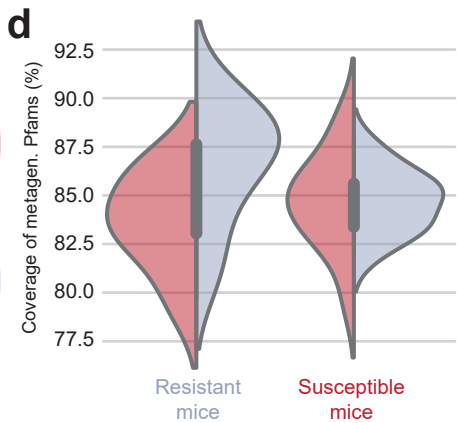

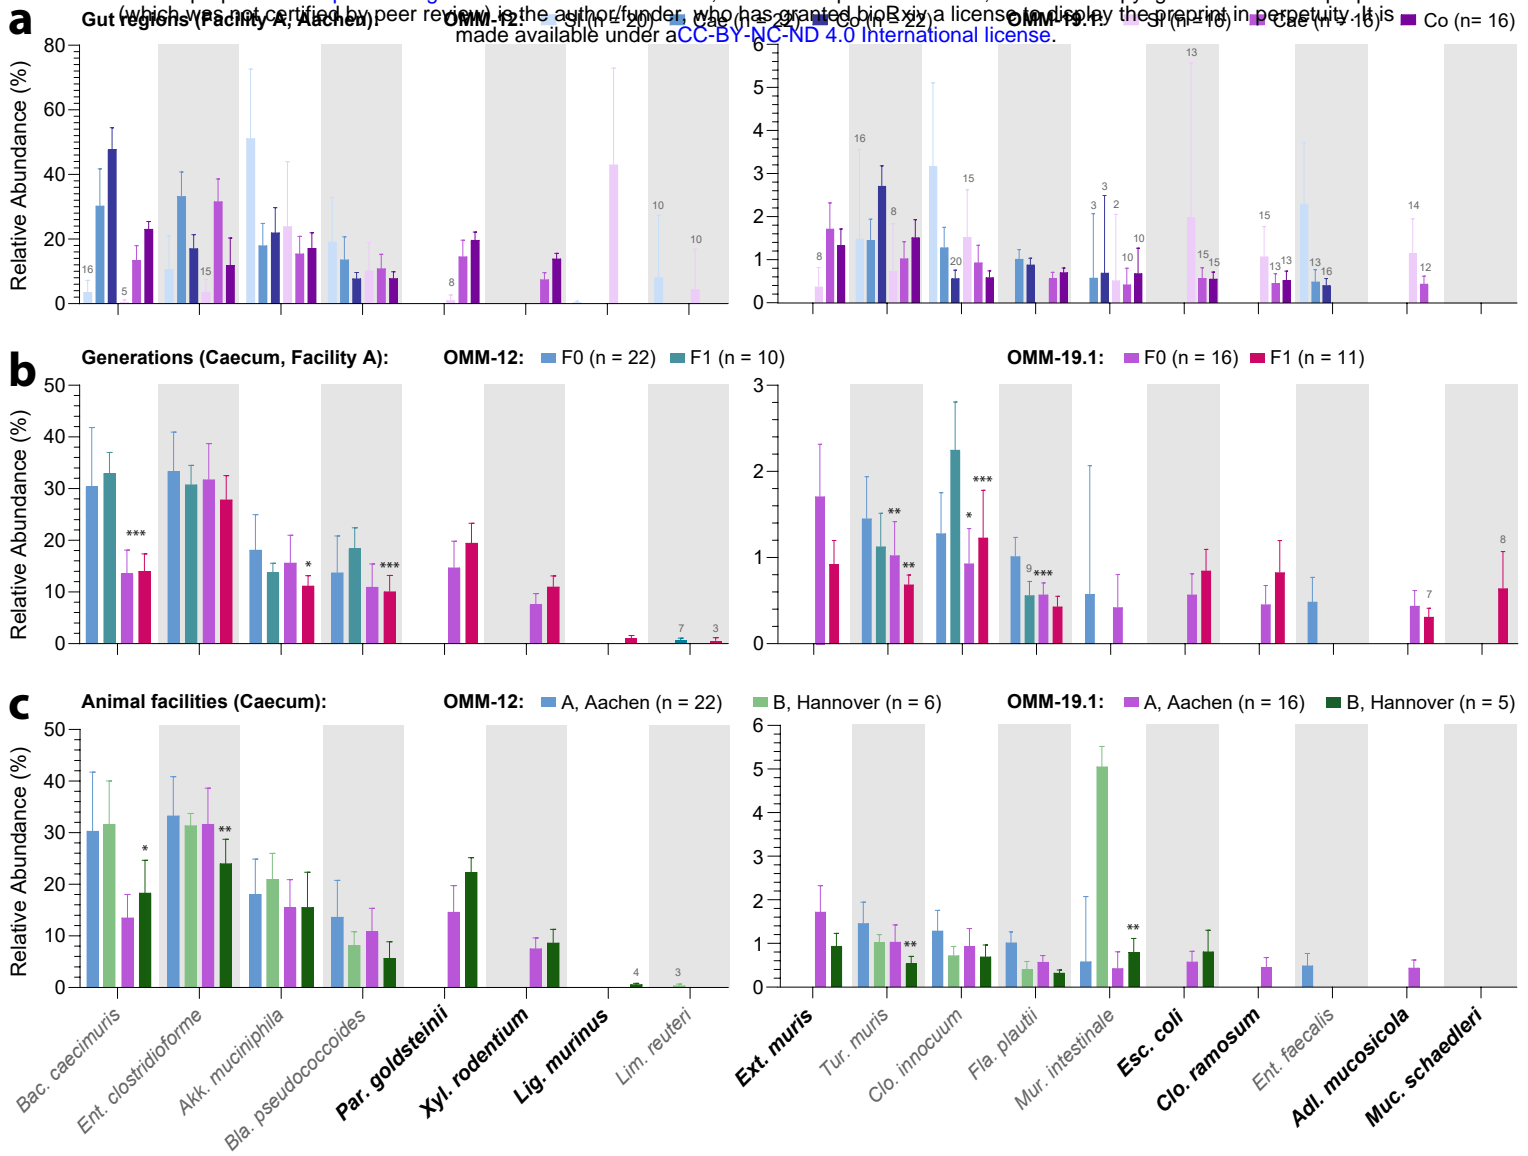



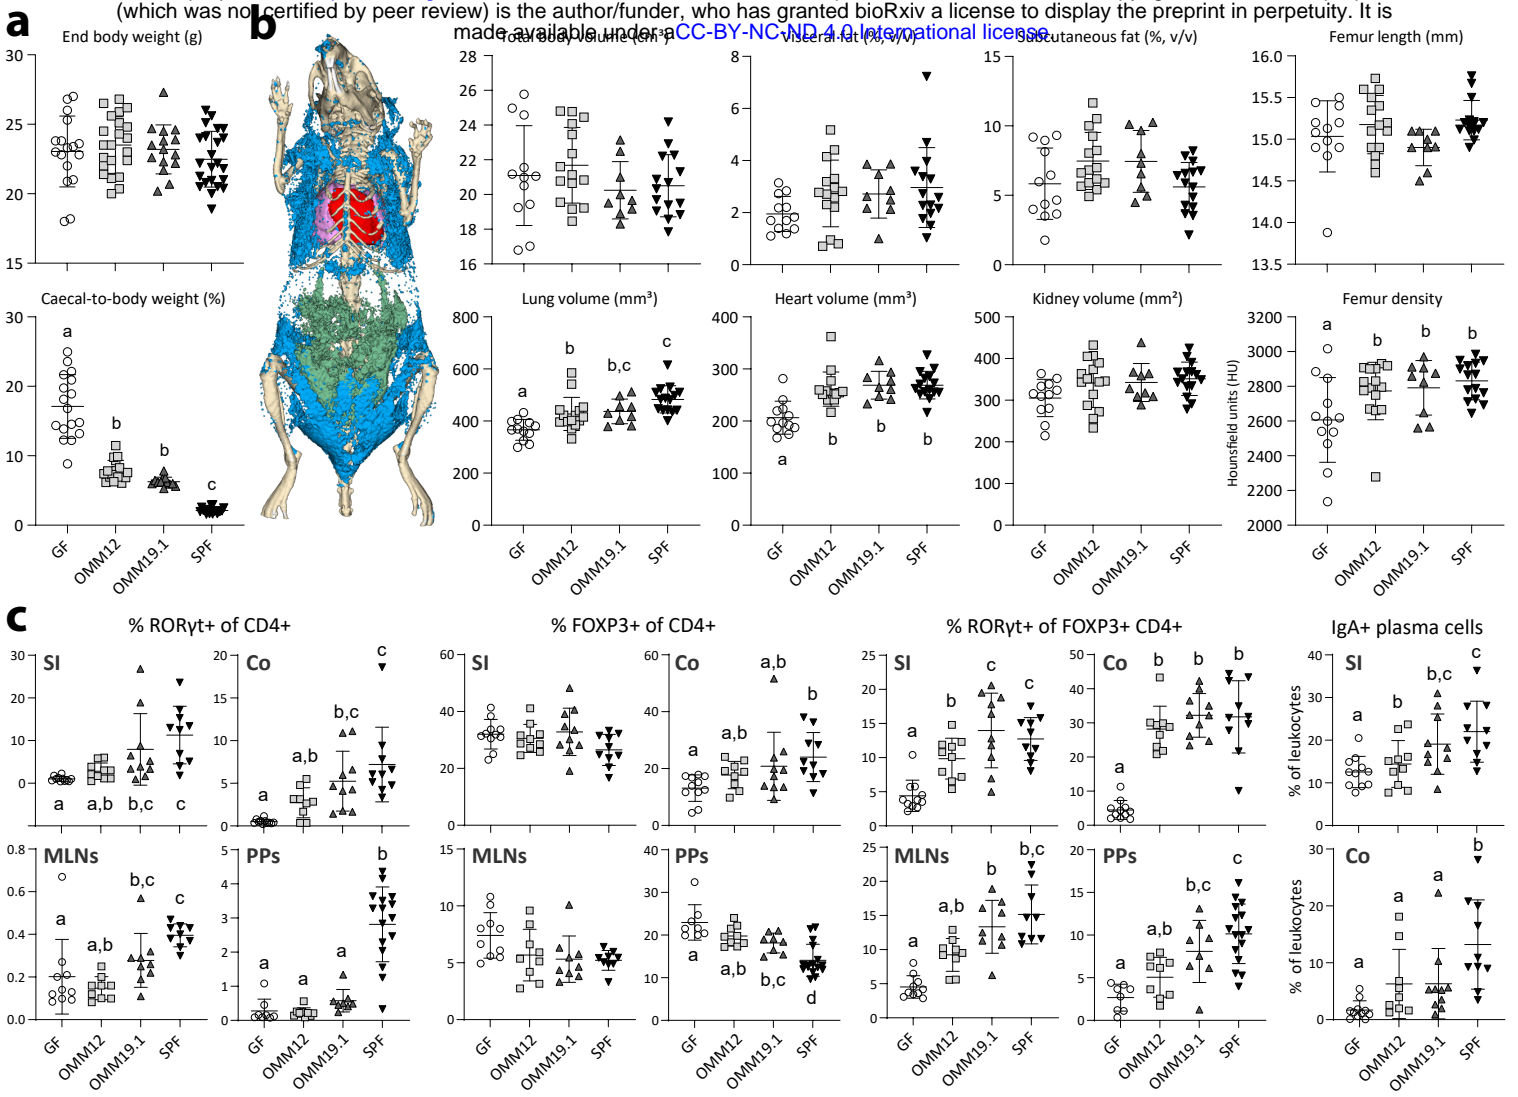

Source: https://www.biorxiv.org/content/10.1101/2022.03.07.483007v1.full.pdf
